# Supplementary material for: GmPGL1, a Thiamine Thiazole Synthase, Is Required for the Biosynthesis of Thiamine in Soybean
Source: PubMed Central journal article supplement (PMC6883718; doi:10.3389/fpls.2019.01546), 2019-11-22
Supplement: DataSheet_1.pdf [file DataSheet_1.pdf]

## Supplementary materials:

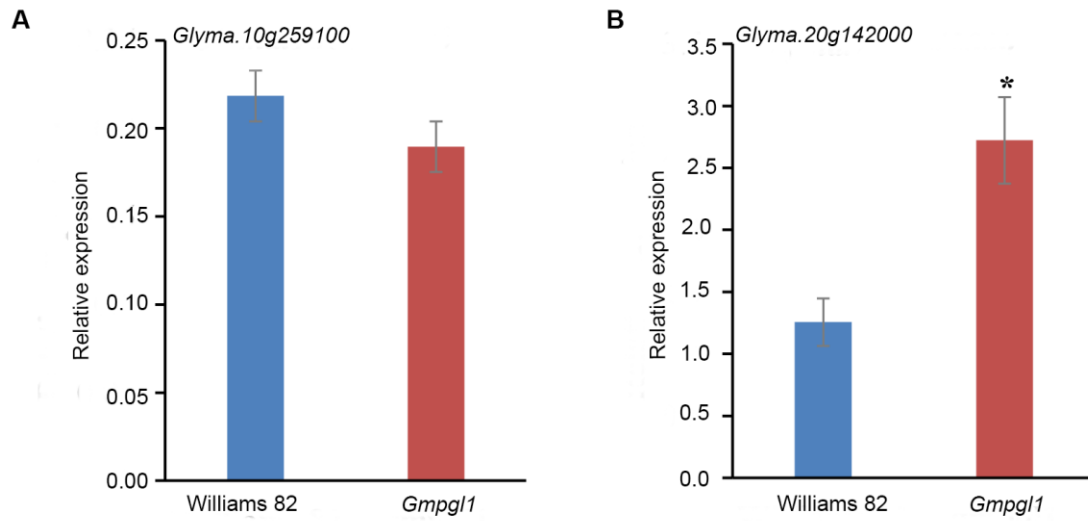

**Figure S1** Expression differences of (A) *Glyma.10G259100* and (B) *Glyma.20G142000* between Williams 82 and *Gmpgl1* mutant. The reference gene is *Con4* gene, values from three independent biological replicates. Asterisks indicate a statistically significant difference between the data of Williams 82 and *Gmpgl1* determined by student's *t*-test ( $P < 0.05$ ) and the error bars represent standard deviations.

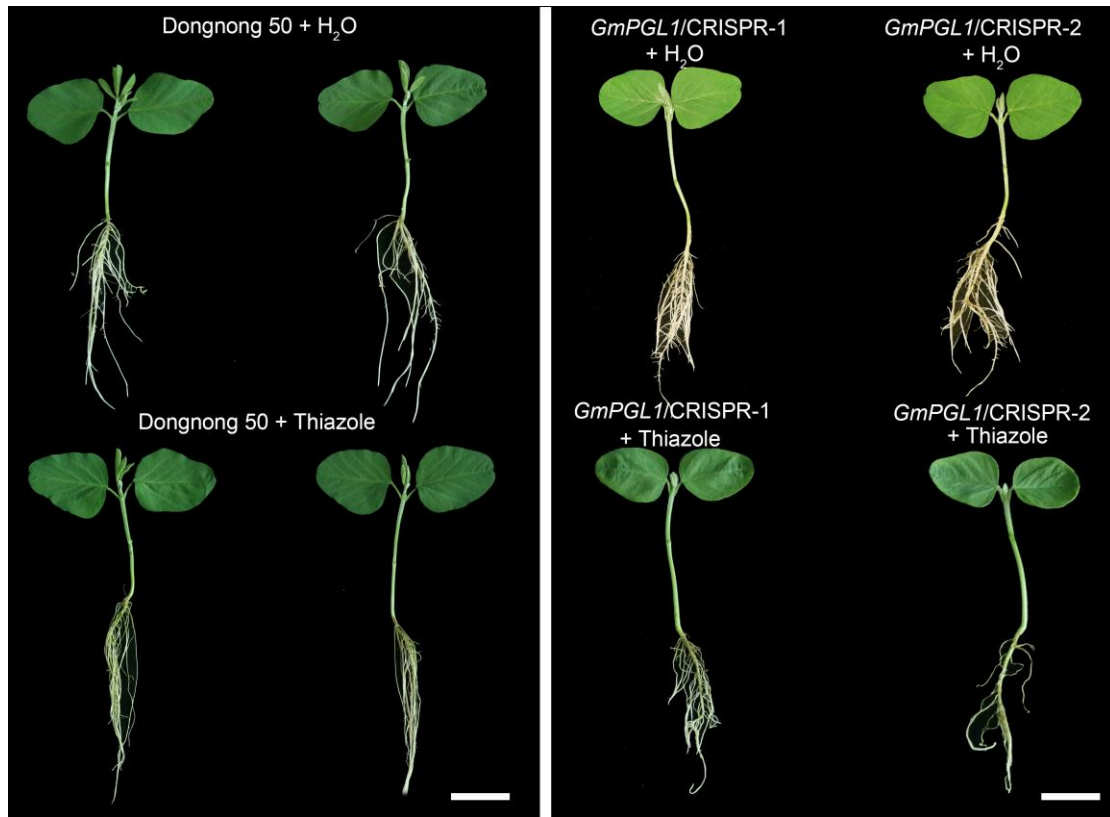

**Figure S2** Complementation of the CRISPR plants phenotype with thiazole. The 8-day old seedlings of Dongnong 50, *GmPGL1*/CRISPR-1 and *GmPGL1*/CRISPR-2 supplemented with water and 15 mM thiazole. Scale bars, 3 cm.

**TableS1** Primers used in this paper

---

| Primer | Primer sequence 5'-3'                   |
|--------|-----------------------------------------|
| OL8155 | CTGTACAAGCATATGATGGCTGCCATGGCAACCACA    |
| OL8156 | GATGAATTCGAGCTCTTAAGCATCAACAATTCCTCAGTG |
| OL8161 | AGTCCCAACAACACTATTCTACTTACC             |
| OL8162 | CATAATTAAGTAGGGACCAAACAG                |
| OL8321 | CCGTGTCTACTGTTCCACTGTCA                 |
| OL8322 | AACTGGTCTGCCACAAAATCCT                  |
| OL8323 | GTTCCCTCCGAAGCCCAATC                    |
| OL8324 | AAGGTTCTCCTCGCCCAGT                     |
| OL8370 | GCTCTGGGACCACGCTCA                      |
| OL8371 | TGGTGCGAACATGGGAAGG                     |
| OL8372 | GTCGCACCCACCACCAAGT                     |
| OL8373 | AGGATTGGAGGTCGTATGGG                    |
| OL8374 | GGTTTGATGTTGTTGGTCGTGC                  |
| OL8375 | GTCTGAGTTGGTAGTTGGGGGA                  |
| OL8473 | CCACTCCGCTCCCCTATCA                     |
| OL8474 | GAAGAGAGGGTTGTGGTTGCC                   |
| OL8475 | TCCACTCACCCTGAAACTGAAACA                |
| OL8476 | GAAGATGATGATTTGTTGAAGAGGG               |
| OL8477 | CCATAACATGGCTTCTTCCACC                  |
| OL8478 | CGGAGAGTAGGGGTGGCAT                     |
| OL9308 | CACCCACCACCAAGTTATTCTCA                 |
| OL9309 | CAACCTTAGCCTCCATCACG                    |

---

**Table S2 SNPs in candidate region**

Tables2 SNPs in candidate region

| Chromosome | Start    | End      | Reference | Mutation | Variation | Mutant bulk | WT bulk  | Mutant             | WT bulk    |
|------------|----------|----------|-----------|----------|-----------|-------------|----------|--------------------|------------|
|            |          |          |           |          | type      | genotype    | genotype | bulk read<br>depth | read depth |
| Chr10      | 46902903 | 46902903 | G         | C        | SNP       | 0 0         | 0 1      | 58 0               | 6 6        |
| Chr10      | 46903557 | 46903557 | A         | T        | SNP       | 0 0         | 0 1      | 58 1               | 2 13       |
| Chr10      | 46906121 | 46906121 | G         | C        | SNP       | 0 0         | 0 1      | 62 0               | 3 11       |
| Chr10      | 46911587 | 46911587 | C         | T        | SNP       | 0 0         | 0 1      | 38 1               | 8 8        |
| Chr10      | 46912036 | 46912036 | T         | C        | SNP       | 0 0         | 0 1      | 26 0               | 6 5        |
| Chr10      | 46916578 | 46916578 | T         | C        | SNP       | 0 0         | 0 1      | 38 0               | 6 16       |
| Chr10      | 46920246 | 46920246 | A         | G        | SNP       | 0 1         | 0 1      | 16 3               | 5 3        |
| Chr10      | 46940169 | 46940169 | G         | C        | SNP       | 0 0         | 0 1      | 38 1               | 2 19       |
| Chr10      | 46944668 | 46944668 | C         | T        | SNP       | 0 0         | 0 1      | 30 0               | 1 9        |
| Chr10      | 46948970 | 46948970 | T         | G        | SNP       | 0 0         | 0 1      | 44 1               | 8 8        |
| Chr10      | 46952446 | 46952446 | T         | C        | SNP       | 0 0         | 0 1      | 11 0               | 1 14       |
| Chr10      | 46952667 | 46952667 | G         | T        | SNP       | 0 0         | 0 1      | 23 0               | 4 4        |
| Chr10      | 46953277 | 46953277 | A         | G        | SNP       | 0 0         | 0 1      | 23 2               | 4 8        |
| Chr10      | 46953606 | 46953606 | A         | G        | SNP       | 0 0         | 0 1      | 20 0               | 5 3        |
| Chr10      | 46955858 | 46955858 | T         | C        | SNP       | 0 1         | 0 1      | 31 3               | 6 9        |
| Chr10      | 46957168 | 46957168 | A         | G        | SNP       | 0 0         | 0 1      | 27 1               | 4 7        |
| Chr10      | 46960908 | 46960908 | T         | G        | SNP       | 0 1         | 0 1      | 7 4                | 7 1        |
| Chr10      | 46969352 | 46969352 | A         | G        | SNP       | 0 0         | 0 1      | 36 0               | 4 11       |
| Chr10      | 46969393 | 46969393 | G         | A        | SNP       | 0 0         | 0 1      | 35 0               | 3 11       |
| Chr10      | 46969430 | 46969430 | T         | G        | SNP       | 0 0         | 0 1      | 37 0               | 2 7        |
| Chr10      | 46970086 | 46970086 | T         | C        | SNP       | 0 0         | 0 1      | 47 1               | 6 9        |
| Chr10      | 46970134 | 46970134 | G         | T        | SNP       | 0 0         | 0 1      | 60 2               | 7 9        |
| Chr10      | 46970202 | 46970202 | A         | G        | SNP       | 0 0         | 0 1      | 59 2               | 6 12       |
| Chr10      | 46970581 | 46970581 | G         | A        | SNP       | 0 0         | 0 1      | 42 2               | 4 13       |
| Chr10      | 46970620 | 46970620 | A         | C        | SNP       | 0 0         | 0 1      | 35 1               | 4 13       |
| Chr10      | 46970707 | 46970707 | T         | G        | SNP       | 0 0         | 0 1      | 11 0               | 2 6        |
| Chr10      | 46971259 | 46971259 | G         | A        | SNP       | 0 0         | 0 1      | 39 1               | 4 4        |
| Chr10      | 46971360 | 46971360 | G         | A        | SNP       | 0 1         | 0 1      | 41 4               | 12 6       |
| Chr10      | 46971477 | 46971477 | T         | C        | SNP       | 0 0         | 0 1      | 40 1               | 8 7        |
| Chr10      | 46972041 | 46972041 | T         | G        | SNP       | 0 0         | 0 1      | 58 1               | 7 22       |
| Chr10      | 46972222 | 46972222 | G         | A        | SNP       | 0 0         | 0 1      | 31 0               | 6 10       |
| Chr10      | 46972309 | 46972309 | T         | C        | SNP       | 0 0         | 0 1      | 26 0               | 3 9        |
| Chr10      | 46974377 | 46974377 | T         | C        | SNP       | 0 1         | 1 1      | 17 3               | 0 8        |
| Chr10      | 46974470 | 46974470 | A         | C        | SNP       | 0 1         | 0 1      | 16 3               | 4 4        |
| Chr10      | 46974514 | 46974514 | C         | T        | SNP       | 0 0         | 0 1      | 20 1               | 4 8        |
| Chr10      | 46975782 | 46975782 | G         | T        | SNP       | 0 0         | 0 1      | 28 1               | 5 10       |
| Chr10      | 46976047 | 46976047 | T         | C        | SNP       | 0 0         | 0 1      | 62 3               | 3 5        |

|       |          |          |   |   |     |     |     |       |       |
|-------|----------|----------|---|---|-----|-----|-----|-------|-------|
| Chr10 | 46976793 | 46976793 | T | A | SNP | 0 0 | 0 1 | 31 0  | 2 8   |
| Chr10 | 46977915 | 46977915 | A | T | SNP | 0 0 | 0 1 | 24 1  | 5 3   |
| Chr10 | 46982896 | 46982896 | G | A | SNP | 0 0 | 0 1 | 33 1  | 1 12  |
| Chr10 | 46983255 | 46983255 | T | C | SNP | 0 0 | 0 1 | 24 0  | 3 9   |
| Chr10 | 46983295 | 46983295 | C | T | SNP | 0 0 | 0 1 | 33 0  | 4 13  |
| Chr10 | 46991481 | 46991481 | G | A | SNP | 0 1 | 0 1 | 24 12 | 5 5   |
| Chr10 | 46991488 | 46991488 | C | T | SNP | 0 1 | 0 1 | 27 12 | 5 5   |
| Chr10 | 46991492 | 46991492 | G | A | SNP | 0 1 | 0 1 | 27 11 | 6 5   |
| Chr10 | 46991517 | 46991517 | T | A | SNP | 0 1 | 0 1 | 24 12 | 8 4   |
| Chr10 | 46991563 | 46991563 | T | G | SNP | 0 1 | 0 1 | 14 7  | 8 3   |
| Chr10 | 46991567 | 46991567 | T | G | SNP | 0 1 | 0 1 | 14 6  | 8 3   |
| Chr10 | 46991573 | 46991573 | G | C | SNP | 0 1 | 0 1 | 13 6  | 8 3   |
| Chr10 | 46991574 | 46991574 | G | A | SNP | 0 1 | 0 1 | 13 6  | 8 3   |
| Chr10 | 46992139 | 46992139 | C | T | SNP | 0 1 | 0 0 | 2 8   | 8 0   |
| Chr10 | 46992527 | 46992527 | A | G | SNP | 0 0 | 0 1 | 18 1  | 4 5   |
| Chr10 | 46992555 | 46992555 | C | T | SNP | 0 0 | 0 1 | 21 0  | 3 5   |
| Chr10 | 46992637 | 46992637 | G | A | SNP | 0 0 | 0 1 | 17 1  | 3 7   |
| Chr10 | 46993062 | 46993062 | C | T | SNP | 0 1 | 0 1 | 16 3  | 5 3   |
| Chr10 | 46993066 | 46993066 | A | G | SNP | 0 1 | 0 1 | 17 5  | 6 3   |
| Chr10 | 46993071 | 46993071 | C | T | SNP | 0 1 | 0 1 | 16 8  | 6 3   |
| Chr10 | 46993080 | 46993080 | A | G | SNP | 0 1 | 0 1 | 17 8  | 6 4   |
| Chr10 | 46993112 | 46993112 | T | A | SNP | 0 1 | 0 1 | 22 24 | 8 8   |
| Chr10 | 46993115 | 46993115 | C | G | SNP | 0 1 | 0 1 | 22 24 | 8 8   |
| Chr10 | 46993120 | 46993120 | T | C | SNP | 0 1 | 0 1 | 22 24 | 9 8   |
| Chr10 | 46993124 | 46993124 | T | C | SNP | 0 1 | 0 1 | 27 25 | 9 8   |
| Chr10 | 46993130 | 46993130 | T | A | SNP | 0 1 | 0 1 | 27 27 | 8 8   |
| Chr10 | 46993132 | 46993132 | T | G | SNP | 0 1 | 0 1 | 27 27 | 8 8   |
| Chr10 | 46993176 | 46993176 | T | A | SNP | 0 1 | 0 1 | 27 34 | 13 11 |
| Chr10 | 46993340 | 46993340 | G | C | SNP | 0 1 | 0 1 | 62 7  | 12 6  |
| Chr10 | 46993341 | 46993341 | T | A | SNP | 0 1 | 0 1 | 62 7  | 12 6  |
| Chr10 | 46993344 | 46993344 | G | A | SNP | 0 1 | 0 1 | 63 7  | 12 6  |
| Chr10 | 46996328 | 46996328 | C | T | SNP | 0 0 | 0 1 | 44 2  | 9 15  |
| Chr10 | 46996512 | 46996512 | C | T | SNP | 0 1 | 0 1 | 37 3  | 10 9  |
| Chr10 | 46996533 | 46996533 | A | C | SNP | 0 0 | 0 1 | 45 3  | 8 11  |
| Chr10 | 46998332 | 46998332 | T | G | SNP | 0 0 | 0 1 | 19 0  | 6 3   |
| Chr10 | 46999153 | 46999153 | A | G | SNP | 0 0 | 0 1 | 31 0  | 8 13  |
| Chr10 | 46999442 | 46999442 | G | A | SNP | 0 0 | 0 1 | 53 1  | 5 12  |
| Chr10 | 46999527 | 46999527 | T | A | SNP | 0 0 | 0 1 | 38 0  | 2 10  |
| Chr10 | 46999906 | 46999906 | G | A | SNP | 0 0 | 0 1 | 29 1  | 5 3   |
| Chr10 | 47000002 | 47000002 | T | C | SNP | 0 0 | 0 1 | 33 1  | 6 4   |
| Chr10 | 47000062 | 47000062 | A | G | SNP | 0 0 | 0 1 | 38 1  | 6 7   |
| Chr10 | 47000271 | 47000271 | T | A | SNP | 0 0 | 0 1 | 67 3  | 7 4   |

|       |          |          |   |   |     |     |     |      |       |
|-------|----------|----------|---|---|-----|-----|-----|------|-------|
| Chr10 | 47000400 | 47000400 | G | T | SNP | 0 0 | 0 1 | 51 4 | 7 3   |
| Chr10 | 47000539 | 47000539 | G | A | SNP | 0 0 | 0 1 | 62 2 | 4 7   |
| Chr10 | 47000565 | 47000565 | T | C | SNP | 0 0 | 0 1 | 56 2 | 4 7   |
| Chr10 | 47000566 | 47000566 | A | G | SNP | 0 0 | 0 1 | 56 2 | 4 7   |
| Chr10 | 47001280 | 47001280 | G | A | SNP | 0 0 | 0 1 | 15 0 | 2 7   |
| Chr10 | 47001845 | 47001845 | T | C | SNP | 0 0 | 0 1 | 15 0 | 3 5   |
| Chr10 | 47001890 | 47001890 | A | T | SNP | 0 0 | 0 1 | 21 0 | 4 5   |
| Chr10 | 47003374 | 47003374 | G | A | SNP | 0 0 | 0 1 | 57 2 | 6 19  |
| Chr10 | 47004735 | 47004735 | A | G | SNP | 0 0 | 0 1 | 50 3 | 7 13  |
| Chr10 | 47005020 | 47005020 | T | C | SNP | 0 0 | 0 1 | 40 3 | 4 15  |
| Chr10 | 47005705 | 47005705 | G | A | SNP | 0 1 | 0 1 | 38 3 | 6 6   |
| Chr10 | 47005886 | 47005886 | T | C | SNP | 0 0 | 0 1 | 36 0 | 4 4   |
| Chr10 | 47006032 | 47006032 | G | A | SNP | 0 0 | 0 1 | 48 0 | 7 4   |
| Chr10 | 47006221 | 47006221 | A | G | SNP | 0 0 | 0 1 | 36 0 | 8 10  |
| Chr10 | 47006267 | 47006267 | A | G | SNP | 0 0 | 0 1 | 31 0 | 10 10 |
| Chr10 | 47006304 | 47006304 | A | G | SNP | 0 0 | 0 1 | 23 0 | 7 7   |
| Chr10 | 47006335 | 47006335 | C | T | SNP | 0 0 | 0 1 | 15 0 | 5 5   |
| Chr10 | 47007600 | 47007600 | G | A | SNP | 0 0 | 0 1 | 23 0 | 1 10  |
| Chr10 | 47007625 | 47007625 | G | A | SNP | 0 0 | 1 1 | 25 0 | 0 9   |
| Chr10 | 47007628 | 47007628 | A | C | SNP | 0 0 | 1 1 | 25 0 | 0 9   |
| Chr10 | 47007638 | 47007638 | C | A | SNP | 0 0 | 1 1 | 28 0 | 0 9   |
| Chr10 | 47007668 | 47007668 | T | G | SNP | 0 0 | 1 1 | 21 0 | 0 9   |
| Chr10 | 47007962 | 47007962 | C | G | SNP | 0 0 | 0 1 | 47 0 | 2 12  |
| Chr10 | 47008187 | 47008187 | C | A | SNP | 0 0 | 0 1 | 64 0 | 7 23  |
| Chr10 | 47008268 | 47008268 | A | T | SNP | 0 0 | 0 1 | 41 1 | 8 21  |
| Chr10 | 47008781 | 47008781 | G | A | SNP | 0 0 | 0 1 | 51 0 | 5 9   |
| Chr10 | 47008919 | 47008919 | T | G | SNP | 0 0 | 0 1 | 69 3 | 6 14  |
| Chr10 | 47008962 | 47008962 | G | T | SNP | 0 0 | 0 1 | 86 3 | 7 14  |
| Chr10 | 47010363 | 47010363 | G | A | SNP | 0 0 | 0 1 | 86 1 | 12 8  |
| Chr10 | 47010526 | 47010526 | A | G | SNP | 0 1 | 0 1 | 55 5 | 4 16  |
| Chr10 | 47010661 | 47010661 | G | A | SNP | 0 1 | 0 1 | 72 8 | 4 7   |
| Chr10 | 47012735 | 47012735 | A | G | SNP | 0 0 | 0 1 | 27 1 | 3 5   |
| Chr10 | 47012740 | 47012740 | T | C | SNP | 0 0 | 0 1 | 24 1 | 3 6   |
| Chr10 | 47012791 | 47012791 | G | A | SNP | 0 0 | 0 1 | 27 1 | 3 6   |
| Chr10 | 47012818 | 47012818 | C | T | SNP | 0 0 | 0 1 | 29 1 | 4 8   |
| Chr10 | 47012876 | 47012876 | T | A | SNP | 0 0 | 0 1 | 37 1 | 6 9   |
| Chr10 | 47013224 | 47013224 | G | T | SNP | 0 0 | 0 1 | 49 0 | 8 10  |
| Chr10 | 47013278 | 47013278 | T | C | SNP | 0 0 | 0 1 | 51 0 | 7 12  |
| Chr10 | 47020407 | 47020407 | C | T | SNP | 0 0 | 0 1 | 38 0 | 3 5   |
| Chr10 | 47033722 | 47033722 | G | T | SNP | 0 0 | 0 1 | 59 2 | 7 10  |
| Chr10 | 47034550 | 47034550 | G | A | SNP | 0 1 | 0 1 | 37 3 | 3 12  |
| Chr10 | 47036249 | 47036249 | A | G | SNP | 0 0 | 0 1 | 16 0 | 2 6   |

|       |          |          |   |   |     |     |     |      |       |
|-------|----------|----------|---|---|-----|-----|-----|------|-------|
| Chr10 | 47037254 | 47037254 | T | C | SNP | 0 0 | 0 1 | 19 1 | 4 5   |
| Chr10 | 47037536 | 47037536 | A | G | SNP | 0 0 | 0 1 | 36 2 | 6 9   |
| Chr10 | 47038720 | 47038720 | A | G | SNP | 0 0 | 0 1 | 56 2 | 6 9   |
| Chr10 | 47039436 | 47039436 | G | A | SNP | 0 0 | 0 1 | 48 1 | 11 11 |
| Chr10 | 47042136 | 47042136 | C | T | SNP | 0 0 | 0 1 | 72 3 | 5 15  |
| Chr10 | 47045556 | 47045556 | T | A | SNP | 0 0 | 0 1 | 19 0 | 6 5   |
| Chr10 | 47056691 | 47056691 | G | T | SNP | 0 0 | 0 1 | 18 0 | 2 6   |
| Chr10 | 47058010 | 47058010 | G | C | SNP | 0 0 | 0 1 | 52 0 | 4 13  |
| Chr10 | 47058298 | 47058298 | G | A | SNP | 0 0 | 0 1 | 31 0 | 1 10  |
| Chr10 | 47059021 | 47059021 | A | G | SNP | 0 0 | 0 1 | 18 0 | 4 8   |
| Chr10 | 47059268 | 47059268 | A | G | SNP | 0 0 | 0 1 | 27 1 | 2 6   |
| Chr10 | 47059429 | 47059429 | G | A | SNP | 0 1 | 0 1 | 30 3 | 2 6   |
| Chr10 | 47060014 | 47060014 | A | C | SNP | 0 0 | 0 1 | 32 0 | 8 16  |
| Chr10 | 47060018 | 47060018 | C | T | SNP | 0 0 | 0 1 | 33 0 | 8 16  |
| Chr10 | 47060080 | 47060080 | A | T | SNP | 0 0 | 0 1 | 20 0 | 4 13  |
| Chr10 | 47061730 | 47061730 | A | T | SNP | 0 0 | 0 1 | 36 1 | 7 10  |
| Chr10 | 47062012 | 47062012 | A | G | SNP | 0 0 | 0 1 | 43 1 | 9 9   |
| Chr10 | 47063767 | 47063767 | A | G | SNP | 0 0 | 0 1 | 15 0 | 4 8   |
| Chr10 | 47063921 | 47063921 | C | A | SNP | 0 0 | 0 1 | 30 0 | 3 26  |
| Chr10 | 47063969 | 47063969 | A | G | SNP | 0 0 | 0 1 | 39 0 | 7 22  |
| Chr10 | 47065375 | 47065375 | A | G | SNP | 0 0 | 0 1 | 62 0 | 7 11  |
| Chr10 | 47065461 | 47065461 | T | A | SNP | 0 0 | 0 1 | 36 1 | 8 13  |
| Chr10 | 47065948 | 47065948 | T | C | SNP | 0 0 | 0 1 | 30 0 | 9 8   |
| Chr10 | 47066078 | 47066078 | A | T | SNP | 0 0 | 0 1 | 43 0 | 6 15  |
| Chr10 | 47066678 | 47066678 | A | C | SNP | 0 0 | 0 1 | 33 0 | 5 12  |
| Chr10 | 47068432 | 47068432 | T | C | SNP | 0 0 | 0 1 | 41 1 | 4 11  |
| Chr10 | 47068472 | 47068472 | A | T | SNP | 0 0 | 0 1 | 27 1 | 5 8   |
| Chr10 | 47068550 | 47068550 | T | G | SNP | 0 0 | 0 1 | 27 0 | 3 6   |
| Chr10 | 47070107 | 47070107 | C | G | SNP | 0 0 | 0 1 | 45 0 | 3 14  |
| Chr10 | 47070195 | 47070195 | C | A | SNP | 0 0 | 1 1 | 32 0 | 0 9   |
| Chr10 | 47071798 | 47071798 | T | C | SNP | 0 0 | 0 1 | 31 0 | 5 6   |
| Chr10 | 47072761 | 47072761 | G | T | SNP | 0 0 | 0 1 | 11 0 | 3 6   |
| Chr10 | 47075026 | 47075026 | A | T | SNP | 0 0 | 0 1 | 28 0 | 1 9   |
| Chr10 | 47075111 | 47075111 | C | T | SNP | 0 0 | 0 1 | 38 0 | 5 7   |
| Chr10 | 47075532 | 47075532 | T | C | SNP | 0 0 | 0 1 | 46 0 | 12 9  |
| Chr10 | 47075561 | 47075561 | A | T | SNP | 0 0 | 0 1 | 51 0 | 10 15 |
| Chr10 | 47076133 | 47076133 | C | T | SNP | 0 0 | 1 1 | 11 0 | 0 10  |
| Chr10 | 47076296 | 47076296 | G | A | SNP | 0 0 | 0 1 | 16 0 | 1 12  |
| Chr10 | 47076326 | 47076326 | T | A | SNP | 0 0 | 1 1 | 18 0 | 0 13  |
| Chr10 | 47076384 | 47076384 | G | A | SNP | 0 0 | 0 1 | 24 0 | 3 10  |
| Chr10 | 47076480 | 47076480 | T | A | SNP | 0 0 | 0 1 | 41 0 | 6 9   |
| Chr10 | 47076496 | 47076496 | T | G | SNP | 0 0 | 0 1 | 42 0 | 6 8   |

|       |          |          |   |   |     |     |     |       |       |
|-------|----------|----------|---|---|-----|-----|-----|-------|-------|
| Chr10 | 47077248 | 47077248 | A | C | SNP | 0 0 | 0 1 | 23 0  | 5 9   |
| Chr10 | 47078235 | 47078235 | C | T | SNP | 0 0 | 0 1 | 17 1  | 4 4   |
| Chr10 | 47078417 | 47078417 | T | C | SNP | 0 0 | 0 1 | 28 0  | 4 7   |
| Chr10 | 47078722 | 47078722 | G | T | SNP | 0 0 | 0 1 | 37 0  | 5 9   |
| Chr10 | 47080440 | 47080440 | T | C | SNP | 0 0 | 0 1 | 28 2  | 5 7   |
| Chr10 | 47081422 | 47081422 | C | T | SNP | 0 1 | 0 1 | 7 1   | 3 6   |
| Chr10 | 47081806 | 47081806 | A | T | SNP | 0 0 | 0 1 | 64 0  | 7 15  |
| Chr10 | 47081938 | 47081938 | C | A | SNP | 0 0 | 0 1 | 59 1  | 7 23  |
| Chr10 | 47082314 | 47082314 | A | C | SNP | 0 0 | 0 1 | 59 1  | 2 12  |
| Chr10 | 47082380 | 47082380 | A | C | SNP | 0 0 | 0 1 | 46 1  | 2 13  |
| Chr10 | 47089584 | 47089584 | G | C | SNP | 0 0 | 0 1 | 48 0  | 14 22 |
| Chr10 | 47089777 | 47089777 | A | C | SNP | 0 1 | 0 1 | 42 6  | 10 11 |
| Chr10 | 47090643 | 47090643 | C | T | SNP | 0 0 | 0 1 | 22 2  | 4 14  |
| Chr10 | 47092673 | 47092673 | A | G | SNP | 0 0 | 0 1 | 26 0  | 6 6   |
| Chr10 | 47092719 | 47092719 | A | G | SNP | 0 0 | 0 1 | 23 0  | 4 5   |
| Chr10 | 47092726 | 47092726 | C | T | SNP | 0 0 | 0 1 | 25 0  | 3 5   |
| Chr10 | 47095041 | 47095041 | G | C | SNP | 0 0 | 0 1 | 58 1  | 12 9  |
| Chr10 | 47095055 | 47095055 | G | A | SNP | 0 0 | 0 1 | 63 1  | 9 12  |
| Chr10 | 47099455 | 47099455 | T | C | SNP | 0 0 | 0 1 | 92 1  | 11 16 |
| Chr10 | 47103794 | 47103794 | G | C | SNP | 0 0 | 0 1 | 10 0  | 5 8   |
| Chr10 | 47111556 | 47111556 | C | T | SNP | 1 1 | 0 1 | 0 22  | 13 4  |
| Chr10 | 47113027 | 47113027 | T | A | SNP | 0 1 | 0 0 | 8 4   | 8 0   |
| Chr10 | 47113092 | 47113092 | A | G | SNP | 0 1 | 0 1 | 12 6  | 11 2  |
| Chr10 | 47154884 | 47154884 | T | G | SNP | 0 0 | 0 1 | 28 2  | 8 12  |
| Chr10 | 47155419 | 47155419 | T | C | SNP | 0 0 | 0 1 | 50 0  | 2 6   |
| Chr10 | 47155671 | 47155671 | G | T | SNP | 0 0 | 0 1 | 53 0  | 11 13 |
| Chr10 | 47155738 | 47155738 | G | A | SNP | 0 1 | 0 1 | 46 28 | 18 13 |
| Chr10 | 47155762 | 47155762 | G | A | SNP | 0 1 | 0 1 | 51 28 | 14 14 |
| Chr10 | 47155773 | 47155773 | C | T | SNP | 0 1 | 0 1 | 43 29 | 13 13 |
| Chr10 | 47155793 | 47155793 | C | T | SNP | 0 1 | 0 1 | 47 27 | 14 19 |
| Chr10 | 47155807 | 47155807 | G | C | SNP | 0 1 | 0 1 | 43 28 | 13 20 |
| Chr10 | 47155814 | 47155814 | T | G | SNP | 0 1 | 0 1 | 43 31 | 13 22 |
| Chr10 | 47155821 | 47155821 | C | T | SNP | 0 1 | 0 1 | 43 33 | 12 18 |
| Chr10 | 47155842 | 47155842 | C | T | SNP | 0 1 | 0 1 | 41 35 | 15 19 |
| Chr10 | 47155856 | 47155856 | C | T | SNP | 0 1 | 0 1 | 41 38 | 16 28 |
| Chr10 | 47155861 | 47155861 | G | C | SNP | 0 1 | 0 1 | 38 34 | 16 28 |
| Chr10 | 47155916 | 47155916 | G | T | SNP | 0 1 | 0 1 | 40 45 | 19 28 |
| Chr10 | 47155922 | 47155922 | A | G | SNP | 0 1 | 0 1 | 41 49 | 20 26 |
| Chr10 | 47155943 | 47155943 | G | C | SNP | 0 1 | 0 1 | 43 56 | 19 24 |
| Chr10 | 47165745 | 47165745 | A | G | SNP | 0 0 | 1 1 | 21 0  | 0 9   |
| Chr10 | 47166711 | 47166711 | A | G | SNP | 0 0 | 0 1 | 13 0  | 1 7   |
| Chr10 | 47166789 | 47166789 | C | T | SNP | 0 0 | 0 1 | 17 0  | 4 12  |

|       |          |          |   |   |     |     |     |      |       |
|-------|----------|----------|---|---|-----|-----|-----|------|-------|
| Chr10 | 47166790 | 47166790 | C | T | SNP | 0 0 | 0 1 | 18 0 | 4 12  |
| Chr10 | 47166847 | 47166847 | C | G | SNP | 0 0 | 0 1 | 21 0 | 6 12  |
| Chr10 | 47166867 | 47166867 | G | A | SNP | 0 0 | 0 1 | 21 0 | 5 12  |
| Chr10 | 47167066 | 47167066 | C | T | SNP | 0 0 | 0 1 | 48 0 | 5 4   |
| Chr10 | 47167089 | 47167089 | A | G | SNP | 0 0 | 0 1 | 37 0 | 6 3   |
| Chr10 | 47167229 | 47167229 | G | A | SNP | 0 0 | 0 1 | 36 0 | 3 8   |
| Chr10 | 47167232 | 47167232 | G | C | SNP | 0 0 | 0 1 | 40 0 | 3 8   |
| Chr10 | 47167403 | 47167403 | T | C | SNP | 0 0 | 0 1 | 38 1 | 5 9   |
| Chr10 | 47167531 | 47167531 | G | T | SNP | 0 0 | 0 1 | 41 2 | 4 9   |
| Chr10 | 47167626 | 47167626 | G | C | SNP | 0 0 | 0 1 | 28 0 | 2 11  |
| Chr10 | 47169012 | 47169012 | G | A | SNP | 0 0 | 0 1 | 67 0 | 13 8  |
| Chr10 | 47169073 | 47169073 | T | A | SNP | 0 0 | 0 1 | 63 0 | 7 7   |
| Chr10 | 47169758 | 47169758 | T | C | SNP | 0 0 | 0 1 | 30 0 | 4 12  |
| Chr10 | 47171383 | 47171383 | T | A | SNP | 0 0 | 0 1 | 47 1 | 4 10  |
| Chr10 | 47171805 | 47171805 | A | C | SNP | 0 0 | 0 1 | 45 0 | 1 12  |
| Chr10 | 47171956 | 47171956 | T | C | SNP | 0 0 | 0 1 | 48 0 | 3 10  |
| Chr10 | 47172517 | 47172517 | G | A | SNP | 0 0 | 0 1 | 49 0 | 1 13  |
| Chr10 | 47172602 | 47172602 | T | A | SNP | 0 0 | 0 1 | 51 0 | 2 9   |
| Chr10 | 47173896 | 47173896 | C | G | SNP | 0 0 | 0 1 | 22 0 | 2 10  |
| Chr10 | 47174782 | 47174782 | A | G | SNP | 0 0 | 0 1 | 57 3 | 6 21  |
| Chr10 | 47177175 | 47177175 | A | G | SNP | 0 0 | 0 1 | 63 0 | 6 14  |
| Chr10 | 47177587 | 47177587 | T | G | SNP | 0 0 | 0 1 | 59 2 | 7 11  |
| Chr10 | 47177869 | 47177869 | T | C | SNP | 0 0 | 0 1 | 57 1 | 16 10 |
| Chr10 | 47178190 | 47178190 | A | G | SNP | 0 0 | 0 1 | 46 0 | 7 12  |
| Chr10 | 47178304 | 47178304 | A | G | SNP | 0 0 | 0 1 | 44 0 | 15 7  |
| Chr10 | 47178732 | 47178732 | G | A | SNP | 0 0 | 0 1 | 65 4 | 10 7  |
| Chr10 | 47179599 | 47179599 | C | T | SNP | 0 0 | 0 1 | 42 0 | 5 9   |
| Chr10 | 47180003 | 47180003 | T | C | SNP | 0 0 | 0 1 | 44 1 | 6 7   |
| Chr10 | 47180310 | 47180310 | A | G | SNP | 0 0 | 0 1 | 49 0 | 2 10  |
| Chr10 | 47180670 | 47180670 | G | A | SNP | 0 0 | 0 1 | 54 0 | 2 6   |
| Chr10 | 47181007 | 47181007 | C | T | SNP | 0 0 | 0 1 | 24 0 | 4 11  |
| Chr10 | 47181915 | 47181915 | C | T | SNP | 0 0 | 0 1 | 10 0 | 1 7   |
| Chr10 | 47181967 | 47181967 | A | G | SNP | 0 0 | 0 1 | 22 0 | 4 6   |
| Chr10 | 47182019 | 47182019 | T | C | SNP | 0 0 | 0 1 | 17 0 | 4 7   |
| Chr10 | 47182739 | 47182739 | T | G | SNP | 0 0 | 0 1 | 34 0 | 4 17  |
| Chr10 | 47183297 | 47183297 | A | G | SNP | 0 0 | 1 1 | 11 0 | 0 8   |
| Chr10 | 47185076 | 47185076 | A | C | SNP | 0 0 | 0 1 | 43 0 | 4 10  |
| Chr10 | 47185420 | 47185420 | A | G | SNP | 0 0 | 0 1 | 29 0 | 2 14  |
| Chr10 | 47186241 | 47186241 | G | C | SNP | 0 0 | 0 1 | 35 0 | 3 8   |
| Chr10 | 47186595 | 47186595 | T | A | SNP | 0 0 | 0 1 | 53 0 | 9 22  |
| Chr10 | 47186597 | 47186597 | T | C | SNP | 0 0 | 0 1 | 53 0 | 9 22  |
| Chr10 | 47187383 | 47187383 | T | C | SNP | 0 0 | 0 1 | 48 0 | 4 11  |



|       |          |          |   |   |     |     |     |      |       |
|-------|----------|----------|---|---|-----|-----|-----|------|-------|
| Chr10 | 47187440 | 47187440 | G | A | SNP | 0 0 | 0 1 | 36 0 | 5 4   |
| Chr10 | 47188283 | 47188283 | T | C | SNP | 0 0 | 0 1 | 9 0  | 5 3   |
| Chr10 | 47188311 | 47188311 | A | C | SNP | 0 0 | 0 1 | 14 0 | 5 3   |
| Chr10 | 47188313 | 47188313 | G | T | SNP | 0 0 | 0 1 | 14 0 | 5 3   |
| Chr10 | 47188868 | 47188868 | C | T | SNP | 0 0 | 0 1 | 27 1 | 6 8   |
| Chr10 | 47188880 | 47188880 | G | A | SNP | 0 0 | 0 1 | 27 1 | 5 7   |
| Chr10 | 47189059 | 47189059 | A | G | SNP | 0 0 | 0 1 | 33 2 | 4 14  |
| Chr10 | 47189106 | 47189106 | C | T | SNP | 0 0 | 0 1 | 39 1 | 4 9   |
| Chr10 | 47189334 | 47189334 | A | G | SNP | 0 0 | 0 1 | 42 0 | 3 13  |
| Chr10 | 47190236 | 47190236 | A | G | SNP | 0 0 | 0 1 | 41 0 | 4 5   |
| Chr10 | 47190541 | 47190541 | A | G | SNP | 0 0 | 0 1 | 28 2 | 9 10  |
| Chr10 | 47190822 | 47190822 | T | C | SNP | 0 0 | 0 1 | 33 0 | 4 5   |
| Chr10 | 47191085 | 47191085 | A | G | SNP | 0 0 | 0 1 | 47 0 | 5 7   |
| Chr10 | 47191124 | 47191124 | G | A | SNP | 0 0 | 0 1 | 47 0 | 7 11  |
| Chr10 | 47191205 | 47191205 | A | G | SNP | 0 0 | 0 1 | 46 0 | 8 17  |
| Chr10 | 47192803 | 47192803 | C | T | SNP | 0 0 | 0 1 | 18 1 | 2 6   |
| Chr10 | 47194294 | 47194294 | A | C | SNP | 0 0 | 0 1 | 20 0 | 3 13  |
| Chr10 | 47195629 | 47195629 | C | A | SNP | 0 0 | 0 1 | 70 2 | 4 9   |
| Chr10 | 47197258 | 47197258 | G | A | SNP | 0 0 | 0 1 | 65 0 | 12 12 |
| Chr10 | 47197588 | 47197588 | T | C | SNP | 0 0 | 0 1 | 83 1 | 17 14 |
| Chr10 | 47197678 | 47197678 | A | C | SNP | 0 0 | 0 1 | 66 0 | 8 5   |
| Chr10 | 47198535 | 47198535 | C | T | SNP | 0 0 | 0 1 | 54 1 | 3 13  |
| Chr10 | 47198760 | 47198760 | A | T | SNP | 0 0 | 0 1 | 25 0 | 1 7   |
| Chr10 | 47198767 | 47198767 | C | G | SNP | 0 0 | 0 1 | 31 0 | 1 7   |
| Chr10 | 47199132 | 47199132 | G | T | SNP | 0 0 | 0 1 | 64 0 | 8 10  |
| Chr10 | 47199417 | 47199417 | C | T | SNP | 0 0 | 0 1 | 58 0 | 7 6   |
| Chr10 | 47200247 | 47200247 | A | T | SNP | 0 0 | 0 1 | 75 0 | 10 11 |
| Chr10 | 47200521 | 47200521 | T | C | SNP | 0 0 | 0 1 | 46 3 | 7 18  |
| Chr10 | 47203477 | 47203477 | C | T | SNP | 0 0 | 0 1 | 27 0 | 4 16  |
| Chr10 | 47207165 | 47207165 | G | A | SNP | 0 0 | 0 1 | 42 1 | 5 3   |
| Chr10 | 47207558 | 47207558 | G | C | SNP | 0 0 | 0 1 | 55 0 | 6 11  |
| Chr10 | 47207847 | 47207847 | C | A | SNP | 0 0 | 0 1 | 50 0 | 5 6   |
| Chr10 | 47208082 | 47208082 | C | T | SNP | 0 0 | 0 1 | 27 0 | 3 7   |
| Chr10 | 47208764 | 47208764 | C | T | SNP | 0 0 | 0 1 | 39 0 | 6 11  |
| Chr10 | 47208927 | 47208927 | A | T | SNP | 0 0 | 0 1 | 54 4 | 8 14  |
| Chr10 | 47209014 | 47209014 | A | G | SNP | 0 1 | 0 1 | 35 6 | 7 11  |
| Chr10 | 47209828 | 47209828 | A | G | SNP | 0 0 | 0 1 | 37 0 | 7 13  |
| Chr10 | 47209861 | 47209861 | C | T | SNP | 0 0 | 0 1 | 34 0 | 5 12  |
| Chr10 | 47209915 | 47209915 | A | G | SNP | 0 0 | 0 1 | 34 0 | 4 10  |
| Chr10 | 47209936 | 47209936 | C | T | SNP | 0 0 | 0 1 | 26 0 | 3 14  |
| Chr10 | 47209957 | 47209957 | A | G | SNP | 0 0 | 0 1 | 22 0 | 2 15  |
| Chr10 | 47210052 | 47210052 | C | A | SNP | 0 0 | 0 1 | 44 2 | 10 15 |

|       |          |          |   |   |     |     |     |      |       |
|-------|----------|----------|---|---|-----|-----|-----|------|-------|
| Chr10 | 47210069 | 47210069 | G | A | SNP | 0 0 | 0 1 | 46 2 | 9 15  |
| Chr10 | 47210562 | 47210562 | T | C | SNP | 0 0 | 0 1 | 70 0 | 6 13  |
| Chr10 | 47210635 | 47210635 | T | C | SNP | 0 0 | 0 1 | 56 0 | 6 12  |
| Chr10 | 47210893 | 47210893 | A | G | SNP | 0 0 | 0 1 | 51 1 | 8 16  |
| Chr10 | 47211259 | 47211259 | A | T | SNP | 0 0 | 0 1 | 68 0 | 3 12  |
| Chr10 | 47211333 | 47211333 | C | T | SNP | 0 0 | 0 1 | 68 0 | 8 16  |
| Chr10 | 47211398 | 47211398 | C | T | SNP | 0 0 | 0 1 | 52 0 | 10 13 |
| Chr10 | 47211423 | 47211423 | A | G | SNP | 0 0 | 0 1 | 47 0 | 9 12  |
| Chr10 | 47211433 | 47211433 | A | C | SNP | 0 0 | 0 1 | 48 0 | 6 10  |
| Chr10 | 47211508 | 47211508 | G | C | SNP | 0 0 | 0 1 | 53 2 | 2 7   |
| Chr10 | 47212007 | 47212007 | T | C | SNP | 0 0 | 0 1 | 17 0 | 8 6   |
| Chr10 | 47212119 | 47212119 | A | C | SNP | 0 0 | 0 1 | 23 0 | 3 6   |
| Chr10 | 47212152 | 47212152 | T | C | SNP | 0 0 | 0 1 | 20 0 | 2 7   |
| Chr10 | 47212504 | 47212504 | A | G | SNP | 0 0 | 0 1 | 20 0 | 2 6   |
| Chr10 | 47212885 | 47212885 | A | G | SNP | 0 0 | 0 1 | 25 0 | 2 7   |
| Chr10 | 47212925 | 47212925 | C | T | SNP | 0 0 | 0 1 | 21 0 | 4 9   |
| Chr10 | 47213658 | 47213658 | A | T | SNP | 0 0 | 0 1 | 62 0 | 1 9   |
| Chr10 | 47213794 | 47213794 | C | T | SNP | 0 0 | 1 1 | 61 0 | 0 10  |
| Chr10 | 47214896 | 47214896 | C | T | SNP | 0 0 | 0 1 | 46 0 | 8 10  |
| Chr10 | 47215982 | 47215982 | G | C | SNP | 0 0 | 0 1 | 54 1 | 12 12 |
| Chr10 | 47219786 | 47219786 | T | G | SNP | 0 0 | 0 1 | 51 0 | 13 12 |
| Chr10 | 47221188 | 47221188 | C | A | SNP | 0 0 | 0 1 | 27 0 | 6 8   |
| Chr10 | 47221297 | 47221297 | C | T | SNP | 0 0 | 0 1 | 21 0 | 8 12  |
| Chr10 | 47222377 | 47222377 | A | C | SNP | 0 0 | 0 1 | 50 0 | 9 8   |
| Chr10 | 47222493 | 47222493 | T | A | SNP | 0 0 | 0 1 | 45 0 | 5 6   |
| Chr10 | 47223116 | 47223116 | G | A | SNP | 0 0 | 0 1 | 53 0 | 4 10  |
| Chr10 | 47223793 | 47223793 | G | A | SNP | 0 0 | 0 1 | 26 0 | 4 7   |
| Chr10 | 47223945 | 47223945 | G | A | SNP | 0 0 | 0 1 | 26 0 | 3 11  |
| Chr10 | 47225871 | 47225871 | A | G | SNP | 0 0 | 0 1 | 68 0 | 6 16  |
| Chr10 | 47226706 | 47226706 | G | T | SNP | 0 0 | 0 1 | 50 0 | 7 8   |
| Chr10 | 47227094 | 47227094 | T | C | SNP | 0 0 | 0 1 | 62 0 | 2 17  |
| Chr10 | 47230664 | 47230664 | A | T | SNP | 0 0 | 0 1 | 35 1 | 5 13  |
| Chr10 | 47230848 | 47230848 | G | T | SNP | 0 0 | 0 1 | 35 1 | 7 6   |
| Chr10 | 47230876 | 47230876 | C | A | SNP | 0 0 | 0 1 | 35 1 | 9 6   |
| Chr10 | 47231760 | 47231760 | A | T | SNP | 0 0 | 1 1 | 14 0 | 0 12  |
| Chr10 | 47231785 | 47231785 | A | G | SNP | 0 0 | 1 1 | 15 0 | 0 12  |
| Chr10 | 47232092 | 47232092 | C | A | SNP | 0 0 | 1 1 | 31 1 | 0 10  |
| Chr10 | 47232119 | 47232119 | C | T | SNP | 0 0 | 1 1 | 28 1 | 0 9   |
| Chr10 | 47232790 | 47232790 | C | A | SNP | 0 0 | 0 1 | 32 0 | 8 7   |
| Chr10 | 47235331 | 47235331 | G | T | SNP | 0 0 | 0 1 | 49 0 | 9 10  |
| Chr10 | 47235379 | 47235379 | A | G | SNP | 0 0 | 0 1 | 50 0 | 6 12  |
| Chr10 | 47235598 | 47235598 | T | A | SNP | 0 0 | 0 1 | 41 1 | 2 17  |

|       |          |          |   |   |     |     |     |      |       |
|-------|----------|----------|---|---|-----|-----|-----|------|-------|
| Chr10 | 47240612 | 47240612 | C | G | SNP | 0 0 | 0 1 | 31 0 | 3 9   |
| Chr10 | 47240636 | 47240636 | T | G | SNP | 0 0 | 0 1 | 30 0 | 3 10  |
| Chr10 | 47240686 | 47240686 | A | G | SNP | 0 0 | 0 1 | 25 0 | 3 7   |
| Chr10 | 47241883 | 47241883 | C | A | SNP | 0 0 | 0 1 | 23 0 | 6 5   |
| Chr10 | 47242495 | 47242495 | A | G | SNP | 0 0 | 0 1 | 15 0 | 4 6   |
| Chr10 | 47242539 | 47242539 | A | T | SNP | 0 0 | 0 1 | 15 0 | 7 9   |
| Chr10 | 47242624 | 47242624 | G | A | SNP | 0 0 | 0 1 | 23 0 | 9 11  |
| Chr10 | 47242659 | 47242659 | T | C | SNP | 0 0 | 0 1 | 31 0 | 6 5   |
| Chr10 | 47242676 | 47242676 | A | G | SNP | 0 0 | 0 1 | 34 0 | 4 5   |
| Chr10 | 47242720 | 47242720 | A | T | SNP | 0 0 | 0 1 | 45 0 | 3 6   |
| Chr10 | 47242835 | 47242835 | A | G | SNP | 0 0 | 0 1 | 40 0 | 8 8   |
| Chr10 | 47242916 | 47242916 | A | T | SNP | 0 0 | 0 1 | 34 0 | 9 6   |
| Chr10 | 47243179 | 47243179 | A | G | SNP | 0 0 | 0 1 | 31 0 | 1 7   |
| Chr10 | 47243500 | 47243500 | C | A | SNP | 0 0 | 0 1 | 57 1 | 3 12  |
| Chr10 | 47243547 | 47243547 | A | C | SNP | 0 0 | 0 1 | 68 0 | 3 13  |
| Chr10 | 47243566 | 47243566 | C | T | SNP | 0 0 | 0 1 | 71 0 | 4 14  |
| Chr10 | 47243694 | 47243694 | C | T | SNP | 0 0 | 0 1 | 57 1 | 3 16  |
| Chr10 | 47243706 | 47243706 | T | G | SNP | 0 0 | 0 1 | 50 1 | 3 13  |
| Chr10 | 47243933 | 47243933 | C | T | SNP | 0 0 | 0 1 | 45 0 | 6 20  |
| Chr10 | 47244091 | 47244091 | T | C | SNP | 0 0 | 0 1 | 51 0 | 15 17 |
| Chr10 | 47244190 | 47244190 | C | G | SNP | 0 0 | 0 1 | 51 1 | 10 18 |
| Chr10 | 47244373 | 47244373 | T | A | SNP | 0 0 | 0 1 | 37 0 | 7 21  |
| Chr10 | 47244491 | 47244491 | T | C | SNP | 0 0 | 0 1 | 54 1 | 4 13  |
| Chr10 | 47245181 | 47245181 | C | T | SNP | 0 0 | 0 1 | 46 0 | 3 7   |
| Chr10 | 47245510 | 47245510 | A | G | SNP | 0 0 | 0 1 | 40 0 | 2 7   |
| Chr10 | 47245539 | 47245539 | A | T | SNP | 0 0 | 0 1 | 46 0 | 2 8   |
| Chr10 | 47246036 | 47246036 | C | A | SNP | 0 0 | 0 1 | 26 0 | 4 5   |
| Chr10 | 47246380 | 47246380 | T | A | SNP | 0 0 | 0 1 | 8 0  | 3 5   |
| Chr10 | 47247475 | 47247475 | C | T | SNP | 0 0 | 0 1 | 10 0 | 3 7   |
| Chr10 | 47247873 | 47247873 | T | A | SNP | 0 0 | 0 1 | 47 0 | 9 19  |
| Chr10 | 47247970 | 47247970 | A | G | SNP | 0 0 | 0 1 | 69 0 | 13 13 |
| Chr10 | 47248193 | 47248193 | T | A | SNP | 0 0 | 0 1 | 45 0 | 9 14  |
| Chr10 | 47248726 | 47248726 | T | G | SNP | 0 0 | 0 1 | 51 0 | 9 9   |
| Chr10 | 47248793 | 47248793 | T | C | SNP | 0 0 | 0 1 | 35 0 | 3 9   |
| Chr10 | 47248800 | 47248800 | T | C | SNP | 0 0 | 0 1 | 35 0 | 3 8   |
| Chr10 | 47249495 | 47249495 | G | A | SNP | 0 0 | 0 1 | 37 2 | 8 21  |
| Chr10 | 47249522 | 47249522 | A | G | SNP | 0 0 | 0 1 | 41 2 | 7 19  |
| Chr10 | 47249626 | 47249626 | C | G | SNP | 0 0 | 0 1 | 40 0 | 4 19  |
| Chr10 | 47249769 | 47249769 | T | G | SNP | 0 0 | 0 1 | 49 1 | 7 11  |
| Chr10 | 47249857 | 47249857 | A | T | SNP | 0 0 | 0 1 | 59 2 | 5 23  |
| Chr10 | 47249925 | 47249925 | G | C | SNP | 0 0 | 0 1 | 79 2 | 5 19  |
| Chr10 | 47249969 | 47249969 | A | G | SNP | 0 0 | 0 1 | 66 2 | 7 16  |

|       |          |          |   |   |     |     |     |      |       |
|-------|----------|----------|---|---|-----|-----|-----|------|-------|
| Chr10 | 47250145 | 47250145 | T | A | SNP | 0 0 | 0 1 | 63 0 | 12 14 |
| Chr10 | 47250390 | 47250390 | A | G | SNP | 0 0 | 0 1 | 45 0 | 4 10  |
| Chr10 | 47250407 | 47250407 | C | A | SNP | 0 0 | 0 1 | 43 0 | 5 9   |
| Chr10 | 47250725 | 47250725 | T | C | SNP | 0 0 | 0 1 | 42 0 | 3 11  |
| Chr10 | 47250794 | 47250794 | A | C | SNP | 0 0 | 0 1 | 37 0 | 3 12  |
| Chr10 | 47250823 | 47250823 | G | A | SNP | 0 0 | 0 1 | 27 0 | 2 10  |
| Chr10 | 47250826 | 47250826 | T | C | SNP | 0 0 | 0 1 | 27 0 | 2 9   |
| Chr10 | 47251089 | 47251089 | A | G | SNP | 0 1 | 0 1 | 10 1 | 2 6   |
| Chr10 | 47251872 | 47251872 | T | A | SNP | 0 0 | 0 1 | 24 0 | 1 7   |
| Chr10 | 47252097 | 47252097 | G | A | SNP | 0 0 | 0 1 | 33 0 | 3 8   |
| Chr10 | 47252142 | 47252142 | A | G | SNP | 0 0 | 0 1 | 38 0 | 3 11  |
| Chr10 | 47252291 | 47252291 | C | T | SNP | 0 0 | 0 1 | 41 0 | 4 9   |
| Chr10 | 47252593 | 47252593 | C | A | SNP | 0 0 | 0 1 | 62 0 | 8 11  |
| Chr10 | 47252643 | 47252643 | T | C | SNP | 0 0 | 0 1 | 49 0 | 8 12  |
| Chr10 | 47252706 | 47252706 | A | G | SNP | 0 0 | 0 1 | 62 0 | 10 11 |
| Chr10 | 47252791 | 47252791 | A | T | SNP | 0 0 | 0 1 | 61 0 | 9 14  |
| Chr10 | 47253104 | 47253104 | T | A | SNP | 0 0 | 0 1 | 47 1 | 5 16  |
| Chr10 | 47253158 | 47253158 | C | T | SNP | 0 0 | 0 1 | 51 0 | 6 17  |
| Chr10 | 47253218 | 47253218 | T | C | SNP | 0 0 | 0 1 | 48 1 | 6 15  |
| Chr10 | 47253671 | 47253671 | C | G | SNP | 0 0 | 0 1 | 36 1 | 3 13  |
| Chr10 | 47253790 | 47253790 | A | T | SNP | 0 0 | 0 1 | 52 0 | 5 8   |
| Chr10 | 47253810 | 47253810 | C | G | SNP | 0 0 | 0 1 | 53 0 | 6 8   |
| Chr10 | 47253892 | 47253892 | C | T | SNP | 0 0 | 0 1 | 51 0 | 10 9  |
| Chr10 | 47253913 | 47253913 | C | T | SNP | 0 0 | 0 1 | 46 0 | 10 9  |
| Chr10 | 47254108 | 47254108 | G | A | SNP | 0 0 | 0 1 | 50 0 | 7 9   |
| Chr10 | 47258556 | 47258556 | C | T | SNP | 0 0 | 0 1 | 37 0 | 12 10 |
| Chr10 | 47260460 | 47260460 | T | A | SNP | 0 0 | 0 1 | 30 2 | 3 6   |
| Chr10 | 47267451 | 47267451 | A | T | SNP | 0 0 | 0 1 | 15 2 | 1 8   |
| Chr10 | 47271380 | 47271380 | T | C | SNP | 0 0 | 0 1 | 33 0 | 4 8   |
| Chr10 | 47279181 | 47279181 | T | C | SNP | 0 0 | 0 1 | 38 2 | 6 15  |
| Chr10 | 47312528 | 47312528 | A | G | SNP | 0 0 | 0 1 | 44 0 | 9 5   |
| Chr10 | 47333510 | 47333510 | G | A | SNP | 0 0 | 0 1 | 22 0 | 8 5   |
| Chr10 | 47333975 | 47333975 | G | T | SNP | 0 0 | 0 1 | 23 0 | 1 7   |
| Chr10 | 47334144 | 47334144 | G | C | SNP | 0 0 | 0 1 | 29 0 | 5 14  |
| Chr10 | 47334147 | 47334147 | C | G | SNP | 0 0 | 0 1 | 30 0 | 5 15  |
| Chr10 | 47334405 | 47334405 | T | G | SNP | 0 0 | 0 1 | 24 1 | 6 10  |
| Chr10 | 47334480 | 47334480 | C | A | SNP | 0 0 | 0 1 | 41 1 | 2 17  |
| Chr10 | 47335325 | 47335325 | T | C | SNP | 0 0 | 0 1 | 36 0 | 7 9   |
| Chr10 | 47335389 | 47335389 | C | T | SNP | 0 0 | 0 1 | 54 0 | 9 8   |
| Chr10 | 47335925 | 47335925 | T | C | SNP | 0 0 | 1 1 | 38 0 | 0 8   |
| Chr10 | 47338067 | 47338067 | C | T | SNP | 0 0 | 0 1 | 21 0 | 5 7   |
| Chr10 | 47339871 | 47339871 | T | G | SNP | 0 0 | 0 1 | 26 2 | 6 7   |

|       |          |          |   |   |     |     |     |      |       |
|-------|----------|----------|---|---|-----|-----|-----|------|-------|
| Chr10 | 47341328 | 47341328 | G | A | SNP | 0 0 | 0 1 | 33 2 | 3 8   |
| Chr10 | 47341392 | 47341392 | T | C | SNP | 0 0 | 0 1 | 38 1 | 2 8   |
| Chr10 | 47342112 | 47342112 | C | T | SNP | 0 1 | 0 1 | 25 4 | 3 6   |
| Chr10 | 47342256 | 47342256 | T | C | SNP | 0 0 | 0 1 | 50 0 | 8 14  |
| Chr10 | 47342292 | 47342292 | G | A | SNP | 0 0 | 0 1 | 42 0 | 6 10  |
| Chr10 | 47342329 | 47342329 | A | G | SNP | 0 0 | 0 1 | 53 1 | 6 8   |
| Chr10 | 47342357 | 47342357 | G | A | SNP | 0 0 | 0 1 | 53 1 | 4 8   |
| Chr10 | 47342453 | 47342453 | C | G | SNP | 0 0 | 0 1 | 57 1 | 1 16  |
| Chr10 | 47342454 | 47342454 | C | T | SNP | 0 0 | 0 1 | 55 1 | 1 16  |
| Chr10 | 47342549 | 47342549 | A | T | SNP | 0 0 | 1 1 | 22 0 | 0 9   |
| Chr10 | 47342617 | 47342617 | T | G | SNP | 0 0 | 0 1 | 29 1 | 2 10  |
| Chr10 | 47342719 | 47342719 | T | A | SNP | 0 0 | 0 1 | 45 1 | 2 7   |
| Chr10 | 47342806 | 47342806 | A | G | SNP | 0 0 | 0 1 | 47 0 | 3 10  |
| Chr10 | 47342807 | 47342807 | G | A | SNP | 0 0 | 0 1 | 47 0 | 3 10  |
| Chr10 | 47342814 | 47342814 | A | G | SNP | 0 0 | 0 1 | 45 0 | 4 10  |
| Chr10 | 47342827 | 47342827 | A | G | SNP | 0 0 | 0 1 | 46 0 | 4 12  |
| Chr10 | 47342841 | 47342841 | T | C | SNP | 0 0 | 0 1 | 42 0 | 4 12  |
| Chr10 | 47342844 | 47342844 | G | A | SNP | 0 0 | 0 1 | 43 0 | 4 14  |
| Chr10 | 47342890 | 47342890 | C | T | SNP | 0 0 | 0 1 | 44 0 | 6 12  |
| Chr10 | 47342892 | 47342892 | T | C | SNP | 0 0 | 0 1 | 44 0 | 6 12  |
| Chr10 | 47342933 | 47342933 | A | G | SNP | 0 0 | 0 1 | 48 0 | 7 14  |
| Chr10 | 47342982 | 47342982 | T | G | SNP | 0 0 | 0 1 | 51 0 | 7 15  |
| Chr10 | 47342994 | 47342994 | C | T | SNP | 0 0 | 0 1 | 53 0 | 6 17  |
| Chr10 | 47342997 | 47342997 | G | A | SNP | 0 0 | 0 1 | 56 0 | 6 16  |
| Chr10 | 47343007 | 47343007 | T | C | SNP | 0 0 | 0 1 | 56 0 | 6 15  |
| Chr10 | 47343038 | 47343038 | T | C | SNP | 0 0 | 0 1 | 60 0 | 5 18  |
| Chr10 | 47343056 | 47343056 | A | C | SNP | 0 0 | 0 1 | 55 0 | 3 19  |
| Chr10 | 47343060 | 47343060 | C | T | SNP | 0 0 | 0 1 | 57 0 | 2 19  |
| Chr10 | 47343064 | 47343064 | A | C | SNP | 0 0 | 0 1 | 59 0 | 2 19  |
| Chr10 | 47343108 | 47343108 | C | T | SNP | 0 0 | 0 1 | 56 1 | 3 23  |
| Chr10 | 47343116 | 47343116 | G | C | SNP | 0 0 | 0 1 | 52 1 | 3 23  |
| Chr10 | 47343117 | 47343117 | T | C | SNP | 0 0 | 0 1 | 52 1 | 3 24  |
| Chr10 | 47343140 | 47343140 | G | A | SNP | 0 0 | 0 1 | 49 2 | 6 18  |
| Chr10 | 47343161 | 47343161 | T | G | SNP | 0 0 | 0 1 | 41 2 | 5 17  |
| Chr10 | 47343216 | 47343216 | G | A | SNP | 0 0 | 0 1 | 42 3 | 10 15 |
| Chr10 | 47343279 | 47343279 | C | T | SNP | 0 0 | 0 1 | 40 2 | 8 15  |
| Chr10 | 47343310 | 47343310 | A | C | SNP | 0 0 | 0 1 | 39 1 | 12 17 |
| Chr10 | 47343312 | 47343312 | G | C | SNP | 0 0 | 0 1 | 40 1 | 12 17 |
| Chr10 | 47343360 | 47343360 | A | G | SNP | 0 0 | 0 1 | 30 1 | 8 9   |
| Chr10 | 47343371 | 47343371 | T | C | SNP | 0 0 | 0 1 | 26 0 | 8 9   |
| Chr10 | 47343373 | 47343373 | A | G | SNP | 0 0 | 0 1 | 24 0 | 8 9   |
| Chr10 | 47343406 | 47343406 | A | G | SNP | 0 0 | 0 1 | 22 0 | 8 5   |

|       |          |          |   |   |     |     |     |      |       |
|-------|----------|----------|---|---|-----|-----|-----|------|-------|
| Chr10 | 47343898 | 47343898 | T | G | SNP | 0 0 | 0 1 | 25 1 | 4 6   |
| Chr10 | 47343914 | 47343914 | C | T | SNP | 0 0 | 0 1 | 23 1 | 4 6   |
| Chr10 | 47343927 | 47343927 | C | T | SNP | 0 0 | 0 1 | 25 1 | 4 6   |
| Chr10 | 47343943 | 47343943 | A | G | SNP | 0 0 | 0 1 | 27 1 | 4 6   |
| Chr10 | 47343967 | 47343967 | A | T | SNP | 0 0 | 0 1 | 26 0 | 4 5   |
| Chr10 | 47343992 | 47343992 | C | A | SNP | 0 0 | 0 1 | 32 0 | 5 5   |
| Chr10 | 47344018 | 47344018 | G | A | SNP | 0 0 | 0 1 | 29 0 | 2 6   |
| Chr10 | 47344075 | 47344075 | G | A | SNP | 0 0 | 0 1 | 29 0 | 7 9   |
| Chr10 | 47344174 | 47344174 | T | C | SNP | 0 0 | 0 1 | 35 0 | 13 9  |
| Chr10 | 47344203 | 47344203 | T | C | SNP | 0 0 | 0 1 | 43 0 | 11 8  |
| Chr10 | 47344233 | 47344233 | A | G | SNP | 0 0 | 0 1 | 43 0 | 8 7   |
| Chr10 | 47344265 | 47344265 | G | C | SNP | 0 0 | 0 1 | 35 0 | 5 5   |
| Chr10 | 47344287 | 47344287 | T | C | SNP | 0 0 | 0 1 | 34 0 | 6 4   |
| Chr10 | 47344317 | 47344317 | G | A | SNP | 0 0 | 0 1 | 27 1 | 4 5   |
| Chr10 | 47344326 | 47344326 | G | A | SNP | 0 0 | 0 1 | 26 0 | 3 5   |
| Chr10 | 47344343 | 47344343 | A | G | SNP | 0 0 | 0 1 | 26 0 | 3 7   |
| Chr10 | 47344422 | 47344422 | A | G | SNP | 0 0 | 0 1 | 27 0 | 6 6   |
| Chr10 | 47344440 | 47344440 | G | C | SNP | 0 0 | 0 1 | 31 0 | 4 6   |
| Chr10 | 47344457 | 47344457 | T | C | SNP | 0 0 | 0 1 | 29 0 | 4 6   |
| Chr10 | 47344461 | 47344461 | A | G | SNP | 0 0 | 0 1 | 28 0 | 4 6   |
| Chr10 | 47344469 | 47344469 | C | T | SNP | 0 0 | 0 1 | 31 0 | 4 6   |
| Chr10 | 47344480 | 47344480 | T | C | SNP | 0 0 | 0 1 | 31 0 | 4 6   |
| Chr10 | 47344490 | 47344490 | C | G | SNP | 0 0 | 0 1 | 28 0 | 5 4   |
| Chr10 | 47344499 | 47344499 | A | G | SNP | 0 0 | 0 1 | 29 0 | 7 4   |
| Chr10 | 47344905 | 47344905 | C | T | SNP | 0 0 | 0 1 | 30 0 | 6 6   |
| Chr10 | 47344981 | 47344981 | A | C | SNP | 0 0 | 0 1 | 26 0 | 4 13  |
| Chr10 | 47345058 | 47345058 | T | C | SNP | 0 0 | 0 1 | 22 0 | 3 10  |
| Chr10 | 47345506 | 47345506 | G | A | SNP | 0 0 | 0 1 | 53 1 | 4 10  |
| Chr10 | 47345620 | 47345620 | G | A | SNP | 0 0 | 0 1 | 46 0 | 12 14 |
| Chr10 | 47345669 | 47345669 | C | T | SNP | 0 0 | 0 1 | 50 0 | 11 14 |
| Chr10 | 47345684 | 47345684 | C | G | SNP | 0 0 | 0 1 | 53 0 | 11 14 |
| Chr10 | 47345862 | 47345862 | C | T | SNP | 0 0 | 0 1 | 52 0 | 7 9   |
| Chr10 | 47347126 | 47347126 | G | A | SNP | 0 0 | 0 1 | 45 0 | 4 10  |
| Chr10 | 47347196 | 47347196 | A | T | SNP | 0 0 | 1 1 | 46 1 | 1 16  |
| Chr10 | 47348624 | 47348624 | T | C | SNP | 0 0 | 0 1 | 33 1 | 7 14  |
| Chr10 | 47349096 | 47349096 | T | C | SNP | 0 0 | 0 1 | 36 1 | 7 7   |
| Chr10 | 47349207 | 47349207 | A | T | SNP | 0 0 | 0 1 | 25 0 | 7 4   |
| Chr10 | 47349932 | 47349932 | C | A | SNP | 0 0 | 0 1 | 30 0 | 3 11  |
| Chr10 | 47350822 | 47350822 | C | T | SNP | 0 0 | 0 1 | 31 0 | 7 11  |
| Chr10 | 47350996 | 47350996 | C | T | SNP | 0 0 | 0 1 | 24 0 | 1 9   |
| Chr10 | 47351019 | 47351019 | A | C | SNP | 0 0 | 0 1 | 21 0 | 4 10  |
| Chr10 | 47351024 | 47351024 | A | G | SNP | 0 0 | 0 1 | 24 0 | 4 10  |

|       |          |          |   |   |     |     |     |      |       |
|-------|----------|----------|---|---|-----|-----|-----|------|-------|
| Chr10 | 47351081 | 47351081 | T | C | SNP | 0 0 | 0 1 | 24 1 | 7 13  |
| Chr10 | 47351154 | 47351154 | T | C | SNP | 0 0 | 0 1 | 44 1 | 7 14  |
| Chr10 | 47351272 | 47351272 | G | T | SNP | 0 1 | 0 1 | 45 5 | 3 16  |
| Chr10 | 47351329 | 47351329 | G | C | SNP | 0 1 | 0 1 | 46 5 | 2 15  |
| Chr10 | 47351334 | 47351334 | C | T | SNP | 0 1 | 0 1 | 46 5 | 3 16  |
| Chr10 | 47351395 | 47351395 | G | A | SNP | 0 0 | 0 1 | 54 0 | 2 14  |
| Chr10 | 47351435 | 47351435 | G | A | SNP | 0 0 | 0 1 | 53 0 | 3 14  |
| Chr10 | 47351437 | 47351437 | T | C | SNP | 0 0 | 0 1 | 54 0 | 3 13  |
| Chr10 | 47351439 | 47351439 | G | A | SNP | 0 0 | 0 1 | 55 0 | 3 13  |
| Chr10 | 47351502 | 47351502 | A | G | SNP | 0 0 | 0 1 | 50 1 | 2 12  |
| Chr10 | 47351594 | 47351594 | G | A | SNP | 0 1 | 0 1 | 46 5 | 3 12  |
| Chr10 | 47351602 | 47351602 | T | C | SNP | 0 1 | 0 1 | 46 5 | 3 14  |
| Chr10 | 47351721 | 47351721 | A | G | SNP | 0 0 | 0 1 | 37 1 | 7 6   |
| Chr10 | 47351728 | 47351728 | C | G | SNP | 0 0 | 0 1 | 36 1 | 7 7   |
| Chr10 | 47351763 | 47351763 | T | C | SNP | 0 0 | 0 1 | 34 1 | 5 6   |
| Chr10 | 47351774 | 47351774 | T | C | SNP | 0 0 | 0 1 | 31 1 | 4 6   |
| Chr10 | 47351785 | 47351785 | C | T | SNP | 0 0 | 0 1 | 28 1 | 4 5   |
| Chr10 | 47351799 | 47351799 | C | A | SNP | 0 0 | 0 1 | 26 2 | 4 6   |
| Chr10 | 47351837 | 47351837 | C | T | SNP | 0 1 | 0 1 | 20 2 | 3 7   |
| Chr10 | 47351872 | 47351872 | T | A | SNP | 0 1 | 0 1 | 21 2 | 4 6   |
| Chr10 | 47351972 | 47351972 | C | T | SNP | 0 0 | 0 1 | 19 0 | 6 3   |
| Chr10 | 47352232 | 47352232 | C | T | SNP | 0 0 | 0 1 | 23 1 | 6 3   |
| Chr10 | 47352389 | 47352389 | A | G | SNP | 0 0 | 0 1 | 29 1 | 4 5   |
| Chr10 | 47352507 | 47352507 | C | A | SNP | 0 0 | 0 1 | 45 1 | 5 10  |
| Chr10 | 47353504 | 47353504 | A | T | SNP | 0 0 | 0 1 | 34 0 | 3 13  |
| Chr10 | 47353677 | 47353677 | T | A | SNP | 0 0 | 0 1 | 74 0 | 6 17  |
| Chr10 | 47354119 | 47354119 | C | T | SNP | 0 0 | 0 1 | 60 0 | 9 11  |
| Chr10 | 47354143 | 47354143 | A | G | SNP | 0 0 | 0 1 | 60 1 | 7 10  |
| Chr10 | 47354287 | 47354287 | A | G | SNP | 0 0 | 0 1 | 44 0 | 2 6   |
| Chr10 | 47355647 | 47355647 | C | A | SNP | 0 0 | 0 1 | 24 0 | 6 4   |
| Chr10 | 47355719 | 47355719 | A | G | SNP | 0 0 | 0 1 | 23 0 | 5 8   |
| Chr10 | 47356081 | 47356081 | C | T | SNP | 0 0 | 0 1 | 49 1 | 2 7   |
| Chr10 | 47356128 | 47356128 | C | A | SNP | 0 0 | 0 1 | 47 1 | 2 10  |
| Chr10 | 47356551 | 47356551 | C | A | SNP | 0 0 | 0 1 | 34 1 | 5 17  |
| Chr10 | 47356555 | 47356555 | C | G | SNP | 0 0 | 0 1 | 34 1 | 5 17  |
| Chr10 | 47356669 | 47356669 | T | C | SNP | 0 0 | 0 1 | 59 1 | 4 13  |
| Chr10 | 47357129 | 47357129 | C | T | SNP | 0 0 | 0 1 | 48 2 | 11 10 |
| Chr10 | 47357312 | 47357312 | C | A | SNP | 0 0 | 0 1 | 56 1 | 5 12  |
| Chr10 | 47358163 | 47358163 | G | A | SNP | 0 0 | 0 1 | 34 0 | 8 11  |
| Chr10 | 47359140 | 47359140 | T | A | SNP | 0 0 | 0 1 | 24 0 | 3 11  |
| Chr10 | 47360060 | 47360060 | A | T | SNP | 0 0 | 0 1 | 36 2 | 8 21  |
| Chr10 | 47360172 | 47360172 | T | G | SNP | 0 0 | 0 1 | 55 0 | 7 17  |

|       |          |          |   |   |     |     |     |      |       |
|-------|----------|----------|---|---|-----|-----|-----|------|-------|
| Chr10 | 47362630 | 47362630 | G | A | SNP | 0 0 | 0 1 | 80 3 | 8 13  |
| Chr10 | 47362777 | 47362777 | C | T | SNP | 0 0 | 0 1 | 96 4 | 9 24  |
| Chr10 | 47363386 | 47363386 | A | G | SNP | 0 0 | 0 1 | 86 1 | 4 13  |
| Chr10 | 47363610 | 47363610 | T | C | SNP | 0 0 | 0 1 | 58 1 | 5 8   |
| Chr10 | 47363778 | 47363778 | T | C | SNP | 0 0 | 0 1 | 68 1 | 3 7   |
| Chr10 | 47363958 | 47363958 | A | G | SNP | 0 0 | 0 1 | 73 1 | 7 8   |
| Chr10 | 47364064 | 47364064 | G | C | SNP | 0 0 | 0 1 | 48 0 | 5 8   |
| Chr10 | 47364080 | 47364080 | G | A | SNP | 0 0 | 0 1 | 51 0 | 3 6   |
| Chr10 | 47364143 | 47364143 | G | T | SNP | 0 0 | 0 1 | 47 0 | 6 9   |
| Chr10 | 47365339 | 47365339 | T | G | SNP | 0 0 | 0 1 | 22 0 | 1 7   |
| Chr10 | 47366245 | 47366245 | G | A | SNP | 0 0 | 0 1 | 69 0 | 4 17  |
| Chr10 | 47366444 | 47366444 | T | C | SNP | 0 0 | 0 1 | 45 0 | 6 9   |
| Chr10 | 47367136 | 47367136 | T | C | SNP | 0 0 | 0 1 | 52 0 | 4 6   |
| Chr10 | 47368826 | 47368826 | C | T | SNP | 0 0 | 0 1 | 71 0 | 4 13  |
| Chr10 | 47373536 | 47373536 | A | T | SNP | 0 0 | 0 1 | 31 0 | 3 7   |
| Chr10 | 47373980 | 47373980 | G | C | SNP | 0 0 | 0 1 | 51 1 | 1 10  |
| Chr10 | 47375429 | 47375429 | G | T | SNP | 0 0 | 0 1 | 43 2 | 4 13  |
| Chr10 | 47376377 | 47376377 | C | A | SNP | 0 0 | 0 1 | 36 0 | 8 6   |
| Chr10 | 47377463 | 47377463 | T | A | SNP | 0 0 | 0 1 | 26 0 | 5 8   |
| Chr10 | 47379396 | 47379396 | A | G | SNP | 0 0 | 0 1 | 49 0 | 4 19  |
| Chr10 | 47384285 | 47384285 | G | A | SNP | 0 0 | 0 1 | 42 0 | 3 12  |
| Chr10 | 47384837 | 47384837 | A | G | SNP | 0 0 | 0 1 | 56 1 | 6 17  |
| Chr10 | 47385874 | 47385874 | G | T | SNP | 0 0 | 0 1 | 53 0 | 4 10  |
| Chr10 | 47386782 | 47386782 | A | T | SNP | 0 0 | 0 1 | 42 1 | 8 12  |
| Chr10 | 47387061 | 47387061 | T | A | SNP | 0 0 | 0 1 | 24 0 | 4 4   |
| Chr10 | 47404257 | 47404257 | T | G | SNP | 0 0 | 0 1 | 45 0 | 5 16  |
| Chr10 | 47411579 | 47411579 | G | A | SNP | 0 0 | 0 1 | 31 0 | 4 8   |
| Chr10 | 47443976 | 47443976 | G | A | SNP | 0 1 | 0 1 | 59 8 | 15 12 |
| Chr10 | 47443995 | 47443995 | T | C | SNP | 0 1 | 0 1 | 54 8 | 15 14 |
| Chr10 | 47444519 | 47444519 | A | G | SNP | 0 0 | 0 1 | 51 0 | 12 11 |
| Chr10 | 47453790 | 47453790 | A | C | SNP | 0 0 | 0 1 | 21 0 | 7 7   |
| Chr10 | 47463036 | 47463036 | C | G | SNP | 0 0 | 0 1 | 33 0 | 5 5   |
| Chr10 | 47463442 | 47463442 | C | A | SNP | 0 0 | 0 1 | 40 0 | 6 4   |
| Chr10 | 47464273 | 47464273 | G | C | SNP | 0 0 | 0 1 | 22 0 | 4 4   |
| Chr10 | 47464531 | 47464531 | A | T | SNP | 0 1 | 0 1 | 12 1 | 2 12  |
| Chr10 | 47464533 | 47464533 | A | C | SNP | 0 1 | 0 1 | 12 1 | 2 12  |
| Chr10 | 47464803 | 47464803 | C | G | SNP | 0 0 | 0 1 | 37 1 | 5 11  |
| Chr10 | 47464856 | 47464856 | G | A | SNP | 0 0 | 0 1 | 31 0 | 4 8   |
| Chr10 | 47464880 | 47464880 | T | C | SNP | 0 0 | 0 1 | 40 0 | 4 8   |
| Chr10 | 47465022 | 47465022 | G | C | SNP | 0 0 | 0 1 | 23 0 | 5 9   |
| Chr10 | 47465071 | 47465071 | A | G | SNP | 0 0 | 0 1 | 22 0 | 3 11  |
| Chr10 | 47465087 | 47465087 | A | G | SNP | 0 0 | 0 1 | 21 0 | 1 11  |



|       |          |          |   |   |     |     |     |      |       |
|-------|----------|----------|---|---|-----|-----|-----|------|-------|
| Chr10 | 47465157 | 47465157 | C | T | SNP | 0 0 | 0 1 | 17 0 | 1 15  |
| Chr10 | 47465168 | 47465168 | G | A | SNP | 0 0 | 0 1 | 18 0 | 1 12  |
| Chr10 | 47465379 | 47465379 | G | A | SNP | 0 0 | 0 1 | 14 0 | 1 7   |
| Chr10 | 47465725 | 47465725 | C | T | SNP | 0 0 | 0 1 | 46 1 | 3 8   |
| Chr10 | 47465748 | 47465748 | A | G | SNP | 0 0 | 0 1 | 45 1 | 4 10  |
| Chr10 | 47465885 | 47465885 | T | A | SNP | 0 0 | 0 1 | 51 0 | 9 10  |
| Chr10 | 47465911 | 47465911 | T | C | SNP | 0 0 | 0 1 | 51 0 | 8 11  |
| Chr10 | 47465928 | 47465928 | T | C | SNP | 0 0 | 0 1 | 50 0 | 6 13  |
| Chr10 | 47466588 | 47466588 | T | C | SNP | 0 1 | 0 1 | 18 3 | 2 8   |
| Chr10 | 47468214 | 47468214 | G | T | SNP | 0 0 | 0 1 | 53 0 | 9 12  |
| Chr10 | 47469484 | 47469484 | C | T | SNP | 0 0 | 0 1 | 48 0 | 6 8   |
| Chr10 | 47469679 | 47469679 | C | T | SNP | 0 0 | 0 1 | 43 0 | 14 6  |
| Chr10 | 47469722 | 47469722 | G | A | SNP | 0 0 | 0 1 | 45 0 | 14 12 |
| Chr10 | 47470185 | 47470185 | G | A | SNP | 0 0 | 0 1 | 46 0 | 5 10  |
| Chr10 | 47470586 | 47470586 | T | C | SNP | 0 0 | 0 1 | 63 1 | 6 12  |
| Chr10 | 47470695 | 47470695 | C | T | SNP | 0 0 | 0 1 | 70 3 | 10 20 |
| Chr10 | 47470898 | 47470898 | A | G | SNP | 0 0 | 0 1 | 70 1 | 8 13  |
| Chr10 | 47471240 | 47471240 | C | A | SNP | 0 0 | 0 1 | 50 0 | 2 9   |
| Chr10 | 47471401 | 47471401 | A | G | SNP | 0 0 | 0 1 | 42 0 | 4 14  |
| Chr10 | 47471847 | 47471847 | T | C | SNP | 0 0 | 0 1 | 30 0 | 2 9   |
| Chr10 | 47472016 | 47472016 | C | T | SNP | 0 1 | 0 1 | 27 2 | 2 7   |
| Chr10 | 47472035 | 47472035 | A | G | SNP | 0 1 | 0 1 | 24 2 | 2 6   |
| Chr10 | 47473223 | 47473223 | C | T | SNP | 0 0 | 0 1 | 62 1 | 6 10  |
| Chr10 | 47473305 | 47473305 | C | T | SNP | 0 0 | 0 1 | 61 4 | 8 6   |
| Chr10 | 47475139 | 47475139 | T | C | SNP | 0 0 | 0 1 | 44 0 | 3 6   |
| Chr10 | 47475833 | 47475833 | A | G | SNP | 0 0 | 0 1 | 20 0 | 6 16  |
| Chr10 | 47476021 | 47476021 | G | C | SNP | 0 0 | 0 1 | 43 0 | 9 9   |
| Chr10 | 47477460 | 47477460 | C | T | SNP | 0 0 | 0 1 | 14 0 | 3 8   |
| Chr10 | 47482989 | 47482989 | G | A | SNP | 0 0 | 0 1 | 62 0 | 4 12  |
| Chr10 | 47483007 | 47483007 | G | A | SNP | 0 0 | 0 1 | 62 0 | 4 15  |
| Chr10 | 47484949 | 47484949 | G | C | SNP | 0 0 | 0 1 | 34 1 | 3 13  |
| Chr10 | 47485080 | 47485080 | G | A | SNP | 0 0 | 0 1 | 61 0 | 2 14  |
| Chr10 | 47487026 | 47487026 | A | C | SNP | 0 0 | 0 1 | 42 0 | 8 13  |
| Chr10 | 47487341 | 47487341 | C | T | SNP | 0 0 | 0 1 | 48 0 | 4 9   |
| Chr10 | 47487418 | 47487418 | C | G | SNP | 0 0 | 0 1 | 39 0 | 2 7   |
| Chr10 | 47487589 | 47487589 | T | A | SNP | 0 0 | 0 1 | 50 0 | 8 9   |
| Chr10 | 47487777 | 47487777 | G | C | SNP | 0 0 | 0 1 | 60 1 | 11 10 |
| Chr10 | 47488249 | 47488249 | C | G | SNP | 0 0 | 0 1 | 46 0 | 6 15  |
| Chr10 | 47489116 | 47489116 | A | G | SNP | 0 0 | 0 1 | 35 0 | 7 4   |
| Chr10 | 47489721 | 47489721 | G | A | SNP | 0 0 | 0 1 | 45 0 | 3 7   |
| Chr10 | 47490270 | 47490270 | C | T | SNP | 0 0 | 0 1 | 25 0 | 3 10  |
| Chr10 | 47491127 | 47491127 | T | C | SNP | 0 0 | 0 1 | 47 0 | 6 5   |

|       |          |          |   |   |     |     |     |      |      |
|-------|----------|----------|---|---|-----|-----|-----|------|------|
| Chr10 | 47491393 | 47491393 | G | A | SNP | 0 0 | 0 1 | 71 0 | 6 16 |
| Chr10 | 47491540 | 47491540 | A | T | SNP | 0 0 | 0 1 | 55 0 | 5 17 |
| Chr10 | 47491751 | 47491751 | A | T | SNP | 0 0 | 0 1 | 55 0 | 7 8  |
| Chr10 | 47491806 | 47491806 | A | T | SNP | 0 0 | 0 1 | 36 0 | 7 5  |
| Chr10 | 47492207 | 47492207 | G | T | SNP | 0 0 | 0 1 | 22 0 | 3 7  |
| Chr10 | 47492251 | 47492251 | T | C | SNP | 0 0 | 0 1 | 22 0 | 4 8  |
| Chr10 | 47492328 | 47492328 | T | C | SNP | 0 0 | 0 1 | 45 0 | 5 6  |
| Chr10 | 47492384 | 47492384 | A | G | SNP | 0 0 | 0 1 | 51 0 | 9 10 |
| Chr10 | 47492409 | 47492409 | G | A | SNP | 0 0 | 0 1 | 41 0 | 11 7 |
| Chr10 | 47492595 | 47492595 | G | A | SNP | 0 0 | 0 1 | 54 2 | 5 6  |
| Chr10 | 47492664 | 47492664 | A | G | SNP | 0 0 | 0 1 | 56 1 | 7 4  |
| Chr10 | 47492668 | 47492668 | C | T | SNP | 0 0 | 0 1 | 57 1 | 7 4  |
| Chr10 | 47492674 | 47492674 | G | T | SNP | 0 0 | 0 1 | 49 1 | 7 4  |
| Chr10 | 47492678 | 47492678 | T | A | SNP | 0 0 | 0 1 | 49 1 | 7 3  |
| Chr10 | 47492687 | 47492687 | C | T | SNP | 0 0 | 0 1 | 49 1 | 7 3  |
| Chr10 | 47492692 | 47492692 | C | T | SNP | 0 0 | 0 1 | 49 0 | 7 3  |
| Chr10 | 47492693 | 47492693 | G | A | SNP | 0 0 | 0 1 | 47 0 | 7 3  |
| Chr10 | 47493043 | 47493043 | T | C | SNP | 0 0 | 0 1 | 71 0 | 5 3  |
| Chr10 | 47493076 | 47493076 | T | G | SNP | 0 0 | 0 1 | 64 0 | 4 4  |
| Chr10 | 47493081 | 47493081 | C | T | SNP | 0 0 | 0 1 | 67 0 | 5 4  |
| Chr10 | 47493084 | 47493084 | C | T | SNP | 0 0 | 0 1 | 64 0 | 7 4  |
| Chr10 | 47493087 | 47493087 | T | G | SNP | 0 0 | 0 1 | 67 0 | 7 4  |
| Chr10 | 47493097 | 47493097 | A | G | SNP | 0 0 | 0 1 | 62 0 | 9 4  |
| Chr10 | 47493098 | 47493098 | T | C | SNP | 0 0 | 0 1 | 60 0 | 9 4  |
| Chr10 | 47493107 | 47493107 | A | G | SNP | 0 0 | 0 1 | 62 0 | 9 4  |
| Chr10 | 47493108 | 47493108 | C | T | SNP | 0 0 | 0 1 | 65 0 | 9 4  |
| Chr10 | 47493126 | 47493126 | T | C | SNP | 0 0 | 0 1 | 65 0 | 9 5  |
| Chr10 | 47493175 | 47493175 | A | G | SNP | 0 0 | 0 1 | 51 0 | 6 9  |
| Chr10 | 47493176 | 47493176 | T | C | SNP | 0 0 | 0 1 | 51 0 | 6 9  |
| Chr10 | 47493202 | 47493202 | G | T | SNP | 0 0 | 0 1 | 52 0 | 10 5 |
| Chr10 | 47493223 | 47493223 | A | G | SNP | 0 0 | 0 1 | 56 0 | 10 6 |
| Chr10 | 47493224 | 47493224 | C | T | SNP | 1 1 | 0 1 | 0 57 | 6 10 |
| Chr10 | 47493226 | 47493226 | G | A | SNP | 0 0 | 0 1 | 55 0 | 9 6  |
| Chr10 | 47493232 | 47493232 | C | G | SNP | 0 0 | 0 1 | 52 0 | 8 6  |
| Chr10 | 47493247 | 47493247 | G | A | SNP | 0 0 | 0 1 | 54 0 | 5 6  |
| Chr10 | 47493248 | 47493248 | C | T | SNP | 0 0 | 0 1 | 54 0 | 4 6  |
| Chr10 | 47493256 | 47493256 | A | G | SNP | 0 0 | 0 1 | 56 0 | 5 6  |
| Chr10 | 47493272 | 47493272 | G | C | SNP | 0 0 | 0 1 | 53 0 | 5 5  |
| Chr10 | 47493282 | 47493282 | T | C | SNP | 0 0 | 0 1 | 52 0 | 5 5  |
| Chr10 | 47493319 | 47493319 | A | G | SNP | 0 0 | 0 1 | 56 0 | 6 4  |
| Chr10 | 47493336 | 47493336 | A | G | SNP | 0 0 | 0 1 | 60 0 | 8 4  |
| Chr10 | 47493337 | 47493337 | T | A | SNP | 0 0 | 0 1 | 60 0 | 8 5  |

|       |          |          |   |   |     |     |     |      |      |
|-------|----------|----------|---|---|-----|-----|-----|------|------|
| Chr10 | 47493371 | 47493371 | T | C | SNP | 0 0 | 0 1 | 610  | 6 7  |
| Chr10 | 47493419 | 47493419 | A | G | SNP | 0 0 | 0 1 | 720  | 7 14 |
| Chr10 | 47493427 | 47493427 | C | T | SNP | 0 0 | 0 1 | 700  | 8 14 |
| Chr10 | 47493431 | 47493431 | T | C | SNP | 0 0 | 0 1 | 690  | 8 14 |
| Chr10 | 47493443 | 47493443 | T | G | SNP | 0 0 | 0 1 | 730  | 9 13 |
| Chr10 | 47493476 | 47493476 | A | C | SNP | 0 0 | 0 1 | 660  | 9 10 |
| Chr10 | 47493484 | 47493484 | G | A | SNP | 0 0 | 0 1 | 620  | 6 10 |
| Chr10 | 47493497 | 47493497 | T | C | SNP | 0 0 | 0 1 | 600  | 6 8  |
| Chr10 | 47493499 | 47493499 | G | A | SNP | 0 0 | 0 1 | 600  | 6 8  |
| Chr10 | 47493501 | 47493501 | T | C | SNP | 0 0 | 0 1 | 570  | 6 8  |
| Chr10 | 47493510 | 47493510 | G | T | SNP | 0 0 | 0 1 | 550  | 6 8  |
| Chr10 | 47493512 | 47493512 | G | A | SNP | 0 0 | 0 1 | 560  | 6 8  |
| Chr10 | 47493534 | 47493534 | A | T | SNP | 0 0 | 0 1 | 560  | 6 3  |
| Chr10 | 47493536 | 47493536 | A | G | SNP | 0 0 | 0 1 | 570  | 6 3  |
| Chr10 | 47493654 | 47493654 | C | T | SNP | 0 0 | 0 1 | 460  | 3 9  |
| Chr10 | 47493677 | 47493677 | T | C | SNP | 0 0 | 0 1 | 450  | 3 9  |
| Chr10 | 47493682 | 47493682 | A | G | SNP | 0 0 | 0 1 | 420  | 3 9  |
| Chr10 | 47493684 | 47493684 | C | T | SNP | 0 0 | 0 1 | 420  | 3 9  |
| Chr10 | 47493693 | 47493693 | T | C | SNP | 0 0 | 0 1 | 370  | 3 9  |
| Chr10 | 47493698 | 47493698 | G | A | SNP | 0 0 | 0 1 | 360  | 3 9  |
| Chr10 | 47493706 | 47493706 | T | C | SNP | 0 0 | 0 1 | 320  | 3 9  |
| Chr10 | 47493718 | 47493718 | T | C | SNP | 0 0 | 0 1 | 330  | 3 8  |
| Chr10 | 47493725 | 47493725 | C | T | SNP | 0 0 | 0 1 | 290  | 3 10 |
| Chr10 | 47494592 | 47494592 | C | G | SNP | 0 0 | 0 1 | 260  | 5 3  |
| Chr10 | 47494600 | 47494600 | T | C | SNP | 0 0 | 0 1 | 300  | 5 3  |
| Chr10 | 47496219 | 47496219 | G | C | SNP | 0 0 | 0 1 | 562  | 4 10 |
| Chr10 | 47499368 | 47499368 | G | C | SNP | 0 0 | 0 1 | 90   | 6 3  |
| Chr10 | 47501189 | 47501189 | T | G | SNP | 0 0 | 0 1 | 290  | 1 8  |
| Chr10 | 47501741 | 47501741 | A | T | SNP | 0 0 | 0 1 | 360  | 7 9  |
| Chr10 | 47505696 | 47505696 | C | A | SNP | 0 0 | 0 1 | 290  | 5 14 |
| Chr10 | 47506002 | 47506002 | A | G | SNP | 0 0 | 0 1 | 400  | 5 11 |
| Chr10 | 47506017 | 47506017 | G | T | SNP | 0 0 | 0 1 | 420  | 6 13 |
| Chr10 | 47506149 | 47506149 | C | A | SNP | 0 0 | 1 1 | 290  | 1 15 |
| Chr10 | 47506199 | 47506199 | T | C | SNP | 0 0 | 1 1 | 190  | 0 14 |
| Chr10 | 47506255 | 47506255 | A | G | SNP | 0 0 | 1 1 | 140  | 0 9  |
| Chr10 | 47506331 | 47506331 | T | C | SNP | 0 0 | 0 1 | 150  | 2 7  |
| Chr10 | 47506653 | 47506653 | T | C | SNP | 0 0 | 0 1 | 240  | 3 5  |
| Chr10 | 47506658 | 47506658 | G | A | SNP | 0 0 | 0 1 | 260  | 3 6  |
| Chr10 | 47509418 | 47509418 | C | T | SNP | 0 0 | 1 1 | 300  | 0 13 |
| Chr10 | 47509716 | 47509716 | G | A | SNP | 0 0 | 0 1 | 381  | 4 4  |
| Chr10 | 47561624 | 47561624 | C | T | SNP | 1 1 | 0 1 | 0 56 | 15 8 |
| Chr10 | 47628665 | 47628665 | T | C | SNP | 0 0 | 0 1 | 541  | 6 11 |

|       |          |          |   |   |     |     |     |       |      |
|-------|----------|----------|---|---|-----|-----|-----|-------|------|
| Chr10 | 47629115 | 47629115 | C | T | SNP | 0 0 | 0 1 | 26 0  | 9 4  |
| Chr10 | 47662787 | 47662787 | C | G | SNP | 0 1 | 0 0 | 54 27 | 2 10 |
| Chr10 | 47662793 | 47662793 | A | G | SNP | 0 1 | 0 0 | 57 28 | 2 10 |
| Chr10 | 47662810 | 47662810 | G | A | SNP | 0 1 | 0 0 | 54 32 | 2 11 |
| Chr10 | 47662887 | 47662887 | C | T | SNP | 0 1 | 0 1 | 54 27 | 19 2 |
| Chr10 | 47666092 | 47666092 | G | T | SNP | 0 0 | 0 1 | 20 0  | 3 7  |
| Chr10 | 47667220 | 47667220 | C | A | SNP | 0 0 | 0 1 | 39 0  | 3 18 |
| Chr10 | 47667288 | 47667288 | G | C | SNP | 0 0 | 0 1 | 43 0  | 2 13 |
| Chr10 | 47667463 | 47667463 | T | G | SNP | 0 1 | 0 1 | 24 3  | 1 12 |
| Chr10 | 47667932 | 47667932 | T | G | SNP | 0 0 | 0 1 | 23 1  | 3 17 |
| Chr10 | 47668746 | 47668746 | T | C | SNP | 0 0 | 0 1 | 38 0  | 2 8  |
| Chr10 | 47668939 | 47668939 | T | G | SNP | 0 0 | 0 1 | 33 0  | 5 4  |
| Chr10 | 47668955 | 47668955 | G | A | SNP | 0 0 | 0 1 | 36 0  | 7 4  |
| Chr10 | 47669092 | 47669092 | A | C | SNP | 0 0 | 0 1 | 36 1  | 5 9  |
| Chr10 | 47669141 | 47669141 | C | A | SNP | 0 0 | 0 1 | 33 0  | 2 7  |
| Chr10 | 47669850 | 47669850 | A | G | SNP | 0 0 | 0 1 | 45 1  | 2 7  |
| Chr10 | 47669985 | 47669985 | T | C | SNP | 0 0 | 0 1 | 45 1  | 3 5  |
| Chr10 | 47670072 | 47670072 | A | T | SNP | 0 0 | 0 1 | 35 0  | 7 7  |
| Chr10 | 47670292 | 47670292 | T | C | SNP | 0 0 | 0 1 | 50 0  | 6 16 |
| Chr10 | 47670533 | 47670533 | C | T | SNP | 0 0 | 0 1 | 33 0  | 4 5  |
| Chr10 | 47670545 | 47670545 | C | T | SNP | 0 0 | 0 1 | 30 0  | 4 6  |
| Chr10 | 47670588 | 47670588 | G | C | SNP | 0 0 | 0 1 | 23 0  | 4 4  |
| Chr10 | 47670692 | 47670692 | G | T | SNP | 0 0 | 0 1 | 15 0  | 4 6  |
| Chr10 | 47670695 | 47670695 | C | T | SNP | 0 0 | 0 1 | 15 0  | 4 5  |
| Chr10 | 47671049 | 47671049 | C | T | SNP | 0 0 | 1 1 | 17 0  | 0 11 |
| Chr10 | 47671263 | 47671263 | A | G | SNP | 0 0 | 1 1 | 20 1  | 0 10 |
| Chr10 | 47671407 | 47671407 | T | C | SNP | 0 0 | 0 1 | 14 0  | 4 6  |
| Chr10 | 47673136 | 47673136 | C | T | SNP | 0 0 | 0 1 | 29 0  | 3 5  |
| Chr10 | 47674939 | 47674939 | A | G | SNP | 0 0 | 0 1 | 55 0  | 7 19 |
| Chr10 | 47679456 | 47679456 | T | C | SNP | 0 1 | 0 1 | 25 2  | 3 13 |
| Chr10 | 47679457 | 47679457 | C | T | SNP | 0 1 | 0 1 | 26 2  | 3 13 |
| Chr10 | 47679791 | 47679791 | T | C | SNP | 0 0 | 0 1 | 33 3  | 2 11 |
| Chr10 | 47687666 | 47687666 | C | A | SNP | 0 0 | 0 1 | 39 0  | 2 11 |
| Chr10 | 47688663 | 47688663 | T | A | SNP | 0 0 | 0 1 | 63 0  | 6 12 |
| Chr10 | 47690352 | 47690352 | G | A | SNP | 0 0 | 0 1 | 37 0  | 5 10 |
| Chr10 | 47690714 | 47690714 | T | C | SNP | 0 1 | 0 1 | 31 5  | 4 9  |
| Chr10 | 47693033 | 47693033 | C | A | SNP | 0 0 | 0 1 | 22 0  | 6 8  |
| Chr10 | 47693927 | 47693927 | T | A | SNP | 0 0 | 0 1 | 39 2  | 3 11 |
| Chr10 | 47694287 | 47694287 | T | C | SNP | 0 0 | 0 1 | 49 1  | 6 13 |
| Chr10 | 47694306 | 47694306 | A | T | SNP | 0 0 | 0 1 | 46 1  | 5 12 |
| Chr10 | 47694399 | 47694399 | A | C | SNP | 0 0 | 0 1 | 37 1  | 6 12 |
| Chr10 | 47694947 | 47694947 | C | T | SNP | 0 0 | 0 1 | 67 0  | 8 6  |

|       |          |          |   |   |     |     |     |      |       |
|-------|----------|----------|---|---|-----|-----|-----|------|-------|
| Chr10 | 47695430 | 47695430 | T | C | SNP | 0 0 | 0 1 | 68 1 | 10 17 |
| Chr10 | 47695977 | 47695977 | G | A | SNP | 0 0 | 0 1 | 50 0 | 6 17  |
| Chr10 | 47699267 | 47699267 | A | G | SNP | 0 0 | 0 1 | 33 1 | 5 4   |
| Chr10 | 47701180 | 47701180 | A | T | SNP | 0 0 | 0 1 | 8 0  | 5 3   |
| Chr10 | 47701442 | 47701442 | A | G | SNP | 0 0 | 0 1 | 27 1 | 2 8   |
| Chr10 | 47701538 | 47701538 | A | T | SNP | 0 0 | 0 1 | 42 0 | 1 12  |
| Chr10 | 47706556 | 47706556 | G | A | SNP | 0 1 | 0 1 | 22 4 | 7 6   |
| Chr10 | 47716007 | 47716007 | G | A | SNP | 0 0 | 0 1 | 34 1 | 1 8   |
| Chr10 | 47716533 | 47716533 | T | A | SNP | 0 0 | 0 1 | 37 0 | 6 10  |
| Chr10 | 47716772 | 47716772 | G | A | SNP | 0 0 | 0 1 | 60 0 | 4 12  |
| Chr10 | 47720849 | 47720849 | C | A | SNP | 0 0 | 0 1 | 39 0 | 3 12  |
| Chr10 | 47726985 | 47726985 | C | T | SNP | 0 0 | 0 1 | 44 0 | 4 14  |
| Chr10 | 47733135 | 47733135 | A | G | SNP | 0 1 | 0 1 | 20 2 | 4 5   |
| Chr10 | 47733309 | 47733309 | T | A | SNP | 0 1 | 0 1 | 19 2 | 3 9   |
| Chr10 | 47733668 | 47733668 | T | A | SNP | 0 0 | 0 1 | 17 0 | 1 7   |
| Chr10 | 47735359 | 47735359 | T | A | SNP | 0 0 | 0 1 | 12 0 | 3 5   |
| Chr10 | 47735360 | 47735360 | T | A | SNP | 0 0 | 0 1 | 12 0 | 3 6   |
| Chr10 | 47735456 | 47735456 | A | C | SNP | 0 0 | 0 1 | 21 0 | 5 7   |
| Chr10 | 47735589 | 47735589 | G | C | SNP | 0 0 | 0 1 | 20 0 | 2 9   |
| Chr10 | 47735595 | 47735595 | G | A | SNP | 0 0 | 0 1 | 21 0 | 1 9   |
| Chr10 | 47735631 | 47735631 | A | G | SNP | 0 0 | 0 1 | 23 0 | 1 9   |
| Chr10 | 47735792 | 47735792 | G | A | SNP | 0 0 | 0 1 | 24 0 | 2 11  |
| Chr10 | 47735793 | 47735793 | G | A | SNP | 0 0 | 0 1 | 24 0 | 2 11  |
| Chr10 | 47736134 | 47736134 | T | C | SNP | 0 0 | 0 1 | 23 0 | 4 5   |
| Chr10 | 47736135 | 47736135 | T | G | SNP | 0 0 | 0 1 | 23 0 | 4 5   |
| Chr10 | 47736147 | 47736147 | T | C | SNP | 0 0 | 0 1 | 25 0 | 4 5   |
| Chr10 | 47736413 | 47736413 | C | T | SNP | 0 0 | 0 1 | 14 0 | 3 6   |
| Chr10 | 47736490 | 47736490 | G | A | SNP | 0 0 | 0 1 | 19 0 | 2 8   |
| Chr10 | 47736507 | 47736507 | G | C | SNP | 0 0 | 0 1 | 22 0 | 2 7   |
| Chr10 | 47736511 | 47736511 | T | C | SNP | 0 0 | 0 1 | 22 0 | 2 7   |
| Chr10 | 47736513 | 47736513 | G | A | SNP | 0 0 | 0 1 | 22 0 | 2 7   |
| Chr10 | 47736589 | 47736589 | A | G | SNP | 0 0 | 0 1 | 15 0 | 2 9   |
| Chr10 | 47736603 | 47736603 | A | G | SNP | 0 0 | 0 1 | 13 0 | 2 8   |
| Chr10 | 47738196 | 47738196 | A | G | SNP | 0 0 | 0 1 | 34 0 | 6 8   |
| Chr10 | 47740299 | 47740299 | T | A | SNP | 0 0 | 0 1 | 25 0 | 3 7   |
| Chr10 | 47740768 | 47740768 | C | G | SNP | 0 0 | 1 1 | 15 0 | 0 10  |
| Chr10 | 47741129 | 47741129 | T | C | SNP | 0 0 | 0 1 | 36 1 | 2 6   |
| Chr10 | 47741169 | 47741169 | A | G | SNP | 0 0 | 0 1 | 44 0 | 2 9   |
| Chr10 | 47743184 | 47743184 | C | T | SNP | 0 0 | 0 1 | 41 2 | 6 9   |
| Chr10 | 47744576 | 47744576 | A | G | SNP | 0 0 | 0 1 | 27 0 | 5 18  |
| Chr10 | 47744777 | 47744777 | A | T | SNP | 0 0 | 0 1 | 33 0 | 4 17  |
| Chr10 | 47746660 | 47746660 | C | T | SNP | 0 0 | 0 1 | 55 0 | 5 5   |

|       |          |          |   |   |     |     |     |      |       |
|-------|----------|----------|---|---|-----|-----|-----|------|-------|
| Chr10 | 47747874 | 47747874 | A | C | SNP | 0 0 | 0 1 | 660  | 8 11  |
| Chr10 | 47748412 | 47748412 | G | C | SNP | 0 0 | 0 1 | 700  | 8 14  |
| Chr10 | 47748441 | 47748441 | T | C | SNP | 0 0 | 0 1 | 730  | 7 14  |
| Chr10 | 47748642 | 47748642 | T | A | SNP | 0 0 | 0 1 | 570  | 9 11  |
| Chr10 | 47748764 | 47748764 | G | C | SNP | 0 0 | 0 1 | 530  | 3 11  |
| Chr10 | 47748768 | 47748768 | G | A | SNP | 0 0 | 0 1 | 520  | 3 14  |
| Chr10 | 47748864 | 47748864 | A | G | SNP | 0 0 | 0 1 | 560  | 6 12  |
| Chr10 | 47749014 | 47749014 | G | C | SNP | 0 0 | 0 1 | 790  | 13 21 |
| Chr10 | 47749260 | 47749260 | T | C | SNP | 0 0 | 0 1 | 680  | 7 18  |
| Chr10 | 47749581 | 47749581 | G | A | SNP | 0 0 | 0 1 | 600  | 6 10  |
| Chr10 | 47749583 | 47749583 | T | A | SNP | 0 0 | 0 1 | 620  | 6 9   |
| Chr10 | 47749935 | 47749935 | T | G | SNP | 0 0 | 0 1 | 720  | 3 10  |
| Chr10 | 47750431 | 47750431 | T | C | SNP | 0 0 | 0 1 | 510  | 10 13 |
| Chr10 | 47750696 | 47750696 | G | A | SNP | 0 0 | 0 1 | 450  | 6 11  |
| Chr10 | 47752102 | 47752102 | A | G | SNP | 0 0 | 0 1 | 41 1 | 4 8   |
| Chr10 | 47752635 | 47752635 | C | A | SNP | 0 0 | 0 1 | 650  | 4 13  |
| Chr10 | 47754214 | 47754214 | A | G | SNP | 0 0 | 0 1 | 340  | 2 11  |
| Chr10 | 47754234 | 47754234 | G | T | SNP | 0 0 | 0 1 | 280  | 3 10  |
| Chr10 | 47754286 | 47754286 | C | A | SNP | 0 0 | 0 1 | 450  | 5 8   |
| Chr10 | 47754815 | 47754815 | T | G | SNP | 0 0 | 0 1 | 270  | 4 6   |
| Chr10 | 47755199 | 47755199 | T | C | SNP | 0 0 | 0 1 | 100  | 2 6   |
| Chr10 | 47755857 | 47755857 | A | T | SNP | 0 0 | 0 1 | 180  | 4 4   |
| Chr10 | 47756066 | 47756066 | A | T | SNP | 0 0 | 0 1 | 110  | 3 10  |
| Chr10 | 47761315 | 47761315 | C | T | SNP | 0 0 | 0 1 | 540  | 4 15  |
| Chr10 | 47764398 | 47764398 | G | C | SNP | 0 0 | 0 1 | 320  | 4 6   |
| Chr10 | 47764565 | 47764565 | A | G | SNP | 0 0 | 0 1 | 300  | 4 11  |
| Chr10 | 47765147 | 47765147 | G | A | SNP | 0 0 | 0 1 | 91 1 | 11 17 |
| Chr10 | 47768770 | 47768770 | T | C | SNP | 0 0 | 0 1 | 380  | 3 10  |
| Chr10 | 47769038 | 47769038 | T | C | SNP | 0 0 | 0 1 | 110  | 3 5   |
| Chr10 | 47769502 | 47769502 | C | T | SNP | 0 0 | 0 1 | 36 2 | 1 8   |
| Chr10 | 47769696 | 47769696 | G | A | SNP | 0 0 | 0 1 | 15 1 | 2 10  |
| Chr10 | 47772740 | 47772740 | T | A | SNP | 0 0 | 0 1 | 120  | 1 9   |
| Chr10 | 47773240 | 47773240 | C | A | SNP | 0 0 | 0 1 | 160  | 3 5   |
| Chr10 | 47773347 | 47773347 | T | C | SNP | 0 0 | 0 1 | 260  | 6 9   |
| Chr10 | 47773735 | 47773735 | G | A | SNP | 0 0 | 0 1 | 430  | 6 17  |
| Chr10 | 47773825 | 47773825 | A | C | SNP | 0 0 | 0 1 | 420  | 7 18  |
| Chr10 | 47774069 | 47774069 | C | A | SNP | 0 0 | 0 1 | 370  | 2 8   |
| Chr10 | 47774626 | 47774626 | T | A | SNP | 0 0 | 0 1 | 710  | 3 19  |
| Chr10 | 47775410 | 47775410 | T | G | SNP | 0 0 | 0 1 | 380  | 7 12  |
| Chr10 | 47776017 | 47776017 | G | A | SNP | 0 0 | 0 1 | 630  | 14 23 |
| Chr10 | 47776239 | 47776239 | C | A | SNP | 0 0 | 0 1 | 64 1 | 4 26  |
| Chr10 | 47776257 | 47776257 | C | G | SNP | 0 0 | 0 1 | 67 1 | 5 26  |

|       |          |          |   |   |     |     |     |      |      |
|-------|----------|----------|---|---|-----|-----|-----|------|------|
| Chr10 | 47776512 | 47776512 | A | C | SNP | 0 0 | 0 1 | 51 1 | 6 23 |
| Chr10 | 47776557 | 47776557 | C | A | SNP | 0 0 | 0 1 | 45 0 | 5 22 |
| Chr10 | 47777765 | 47777765 | C | A | SNP | 0 0 | 0 1 | 50 0 | 1 14 |
| Chr10 | 47777931 | 47777931 | G | T | SNP | 0 0 | 0 1 | 54 0 | 6 5  |
| Chr10 | 47777991 | 47777991 | C | T | SNP | 0 0 | 0 1 | 45 0 | 4 10 |
| Chr10 | 47778559 | 47778559 | T | G | SNP | 0 0 | 0 1 | 22 0 | 2 14 |
| Chr10 | 47778642 | 47778642 | T | C | SNP | 0 0 | 0 1 | 18 0 | 2 7  |
| Chr10 | 47779235 | 47779235 | A | T | SNP | 0 0 | 0 1 | 23 0 | 2 8  |
| Chr10 | 47779347 | 47779347 | T | A | SNP | 0 0 | 0 1 | 28 0 | 4 6  |
| Chr10 | 47779369 | 47779369 | T | A | SNP | 0 0 | 0 1 | 30 0 | 4 7  |
| Chr10 | 47779730 | 47779730 | G | A | SNP | 0 0 | 0 1 | 65 8 | 5 14 |
| Chr10 | 47779915 | 47779915 | C | T | SNP | 0 0 | 0 1 | 58 0 | 4 14 |
| Chr10 | 47780021 | 47780021 | G | T | SNP | 0 0 | 0 1 | 50 0 | 2 8  |
| Chr10 | 47780252 | 47780252 | T | C | SNP | 0 0 | 0 1 | 54 0 | 4 7  |
| Chr10 | 47780302 | 47780302 | G | A | SNP | 0 0 | 0 1 | 56 0 | 5 11 |
| Chr10 | 47780381 | 47780381 | G | C | SNP | 0 0 | 0 1 | 66 0 | 8 19 |
| Chr10 | 47780389 | 47780389 | T | A | SNP | 0 0 | 0 1 | 62 0 | 7 20 |
| Chr10 | 47780587 | 47780587 | T | C | SNP | 0 0 | 0 1 | 92 0 | 7 19 |
| Chr10 | 47780620 | 47780620 | G | A | SNP | 0 0 | 0 1 | 82 0 | 6 16 |
| Chr10 | 47781656 | 47781656 | A | G | SNP | 0 0 | 0 1 | 39 0 | 4 13 |
| Chr10 | 47781893 | 47781893 | T | A | SNP | 0 0 | 0 1 | 41 0 | 5 4  |
| Chr10 | 47781945 | 47781945 | G | C | SNP | 0 0 | 0 1 | 32 0 | 5 6  |
| Chr10 | 47781964 | 47781964 | G | A | SNP | 0 0 | 0 1 | 24 0 | 5 4  |
| Chr10 | 47781965 | 47781965 | C | T | SNP | 0 0 | 0 1 | 24 0 | 5 5  |
| Chr10 | 47781971 | 47781971 | A | C | SNP | 0 0 | 0 1 | 25 0 | 5 5  |
| Chr10 | 47781978 | 47781978 | G | A | SNP | 0 0 | 0 1 | 21 0 | 3 5  |
| Chr10 | 47781983 | 47781983 | C | T | SNP | 0 0 | 0 1 | 21 0 | 3 5  |
| Chr10 | 47781994 | 47781994 | C | T | SNP | 0 0 | 0 1 | 24 0 | 3 5  |
| Chr10 | 47782187 | 47782187 | G | A | SNP | 0 0 | 0 1 | 19 0 | 4 7  |
| Chr10 | 47782199 | 47782199 | T | C | SNP | 0 0 | 0 1 | 21 0 | 4 6  |
| Chr10 | 47783978 | 47783978 | G | T | SNP | 0 0 | 0 1 | 55 0 | 7 12 |
| Chr10 | 47784005 | 47784005 | C | T | SNP | 0 0 | 0 1 | 49 0 | 5 16 |
| Chr10 | 47784035 | 47784035 | G | A | SNP | 0 0 | 0 1 | 45 0 | 6 14 |
| Chr10 | 47784041 | 47784041 | T | C | SNP | 0 0 | 0 1 | 46 0 | 6 15 |
| Chr10 | 47784083 | 47784083 | G | C | SNP | 0 0 | 0 1 | 35 1 | 4 18 |
| Chr10 | 47784152 | 47784152 | G | A | SNP | 0 0 | 0 1 | 41 0 | 2 14 |
| Chr10 | 47784173 | 47784173 | G | A | SNP | 0 0 | 0 1 | 40 0 | 1 12 |
| Chr10 | 47784251 | 47784251 | A | C | SNP | 0 0 | 0 1 | 41 0 | 1 12 |
| Chr10 | 47784356 | 47784356 | G | A | SNP | 0 0 | 0 1 | 41 0 | 2 16 |
| Chr10 | 47784461 | 47784461 | A | T | SNP | 0 0 | 0 1 | 51 0 | 2 9  |
| Chr10 | 47784980 | 47784980 | G | T | SNP | 0 0 | 0 1 | 47 0 | 8 22 |
| Chr10 | 47785058 | 47785058 | T | G | SNP | 0 0 | 0 1 | 42 0 | 4 11 |

|       |          |          |   |   |     |     |     |      |       |
|-------|----------|----------|---|---|-----|-----|-----|------|-------|
| Chr10 | 47785780 | 47785780 | A | G | SNP | 0 0 | 0 1 | 13 0 | 12 10 |
| Chr10 | 47786295 | 47786295 | C | T | SNP | 0 0 | 0 1 | 19 0 | 1 8   |
| Chr10 | 47786321 | 47786321 | G | C | SNP | 0 0 | 0 1 | 24 0 | 2 9   |
| Chr10 | 47787323 | 47787323 | T | A | SNP | 0 0 | 0 1 | 43 0 | 2 15  |
| Chr10 | 47787390 | 47787390 | C | A | SNP | 0 0 | 0 1 | 50 0 | 2 16  |
| Chr10 | 47787394 | 47787394 | T | G | SNP | 0 0 | 0 1 | 49 0 | 2 14  |
| Chr10 | 47787803 | 47787803 | G | A | SNP | 0 0 | 0 1 | 33 0 | 5 15  |
| Chr10 | 47788430 | 47788430 | A | T | SNP | 0 0 | 0 1 | 50 0 | 2 9   |
| Chr10 | 47788657 | 47788657 | A | G | SNP | 0 0 | 0 1 | 40 0 | 3 17  |
| Chr10 | 47789208 | 47789208 | G | T | SNP | 0 0 | 0 1 | 46 0 | 2 14  |
| Chr10 | 47789866 | 47789866 | G | C | SNP | 0 0 | 0 1 | 32 0 | 8 9   |
| Chr10 | 47792562 | 47792562 | A | C | SNP | 0 0 | 0 1 | 60 0 | 1 9   |
| Chr10 | 47793126 | 47793126 | T | C | SNP | 0 0 | 0 1 | 53 0 | 2 17  |
| Chr10 | 47793449 | 47793449 | T | A | SNP | 0 0 | 0 1 | 66 0 | 2 9   |
| Chr10 | 47793759 | 47793759 | T | A | SNP | 0 0 | 0 1 | 62 2 | 7 12  |
| Chr10 | 47794146 | 47794146 | T | A | SNP | 0 0 | 0 1 | 18 0 | 4 9   |
| Chr10 | 47794797 | 47794797 | G | A | SNP | 0 0 | 0 1 | 54 1 | 4 20  |
| Chr10 | 47796128 | 47796128 | T | C | SNP | 0 0 | 0 1 | 42 0 | 3 13  |
| Chr10 | 47796286 | 47796286 | G | A | SNP | 0 0 | 0 1 | 35 0 | 8 11  |
| Chr10 | 47796615 | 47796615 | T | C | SNP | 0 0 | 0 1 | 21 0 | 2 6   |
| Chr10 | 47796627 | 47796627 | G | A | SNP | 0 0 | 1 1 | 23 0 | 0 12  |
| Chr10 | 47797732 | 47797732 | G | T | SNP | 0 0 | 0 1 | 64 0 | 6 16  |
| Chr10 | 47799129 | 47799129 | A | G | SNP | 0 0 | 0 1 | 53 0 | 10 20 |
| Chr10 | 47800187 | 47800187 | C | G | SNP | 0 0 | 0 1 | 48 0 | 4 14  |
| Chr10 | 47800191 | 47800191 | C | T | SNP | 0 0 | 0 1 | 48 0 | 3 15  |
| Chr10 | 47801332 | 47801332 | G | A | SNP | 0 0 | 0 1 | 35 0 | 6 12  |
| Chr10 | 47801334 | 47801334 | C | T | SNP | 0 0 | 0 1 | 35 0 | 6 12  |
| Chr10 | 47801385 | 47801385 | C | T | SNP | 0 0 | 0 1 | 29 0 | 4 9   |
| Chr10 | 47801947 | 47801947 | G | A | SNP | 0 0 | 0 1 | 57 0 | 7 19  |
| Chr10 | 47802686 | 47802686 | A | G | SNP | 0 0 | 0 1 | 40 0 | 1 8   |
| Chr10 | 47803593 | 47803593 | T | A | SNP | 0 0 | 0 1 | 29 1 | 2 8   |
| Chr10 | 47803712 | 47803712 | G | A | SNP | 0 0 | 0 1 | 42 0 | 7 15  |
| Chr10 | 47804075 | 47804075 | A | G | SNP | 0 0 | 0 1 | 43 0 | 6 19  |
| Chr10 | 47806039 | 47806039 | A | G | SNP | 0 0 | 1 1 | 20 0 | 2 15  |
| Chr10 | 47806108 | 47806108 | G | A | SNP | 0 0 | 0 1 | 25 0 | 3 14  |
| Chr10 | 47806458 | 47806458 | T | C | SNP | 0 0 | 0 1 | 42 0 | 3 8   |
| Chr10 | 47806468 | 47806468 | T | C | SNP | 0 0 | 0 1 | 46 0 | 4 7   |
| Chr10 | 47806604 | 47806604 | G | A | SNP | 0 0 | 0 1 | 37 0 | 4 16  |
| Chr10 | 47807361 | 47807361 | T | C | SNP | 0 0 | 0 1 | 34 0 | 11 5  |
| Chr10 | 47808226 | 47808226 | G | C | SNP | 0 0 | 0 1 | 29 0 | 2 7   |
| Chr10 | 47808549 | 47808549 | T | C | SNP | 0 0 | 0 1 | 30 0 | 4 8   |
| Chr10 | 47808560 | 47808560 | C | A | SNP | 0 0 | 0 1 | 28 0 | 3 7   |



|       |          |          |   |   |     |     |     |      |      |
|-------|----------|----------|---|---|-----|-----|-----|------|------|
| Chr10 | 47808580 | 47808580 | G | A | SNP | 0 0 | 0 1 | 290  | 3 5  |
| Chr10 | 47809881 | 47809881 | C | T | SNP | 0 0 | 0 1 | 500  | 6 12 |
| Chr10 | 47809933 | 47809933 | A | G | SNP | 0 0 | 0 1 | 530  | 3 12 |
| Chr10 | 47810950 | 47810950 | T | C | SNP | 0 0 | 0 1 | 421  | 6 12 |
| Chr10 | 47811613 | 47811613 | T | A | SNP | 0 0 | 0 1 | 261  | 3 12 |
| Chr10 | 47811646 | 47811646 | A | G | SNP | 0 0 | 0 1 | 260  | 2 9  |
| Chr10 | 47813969 | 47813969 | T | C | SNP | 0 0 | 0 1 | 8 0  | 1 11 |
| Chr10 | 47816262 | 47816262 | T | G | SNP | 0 0 | 0 1 | 350  | 6 12 |
| Chr10 | 47816876 | 47816876 | A | T | SNP | 0 0 | 0 1 | 640  | 3 14 |
| Chr10 | 47817161 | 47817161 | G | A | SNP | 0 0 | 0 1 | 41 2 | 7 10 |
| Chr10 | 47817388 | 47817388 | A | C | SNP | 0 0 | 0 1 | 61 1 | 2 6  |
| Chr10 | 47818215 | 47818215 | G | A | SNP | 0 0 | 0 1 | 430  | 8 10 |
| Chr10 | 47818262 | 47818262 | T | C | SNP | 0 0 | 0 1 | 360  | 8 10 |
| Chr10 | 47818380 | 47818380 | C | T | SNP | 0 1 | 0 1 | 13 1 | 3 11 |
| Chr10 | 47818429 | 47818429 | C | T | SNP | 0 0 | 0 1 | 15 1 | 5 13 |
| Chr10 | 47818719 | 47818719 | A | C | SNP | 0 0 | 0 1 | 360  | 2 8  |
| Chr10 | 47818893 | 47818893 | C | A | SNP | 0 0 | 0 1 | 460  | 2 16 |
| Chr10 | 47819071 | 47819071 | C | A | SNP | 0 0 | 0 1 | 60 1 | 5 24 |
| Chr10 | 47819090 | 47819090 | T | C | SNP | 0 0 | 0 1 | 53 1 | 4 21 |
| Chr10 | 47819340 | 47819340 | T | G | SNP | 0 0 | 0 1 | 43 1 | 4 4  |
| Chr10 | 47819713 | 47819713 | A | C | SNP | 0 0 | 0 1 | 260  | 5 6  |
| Chr10 | 47821142 | 47821142 | A | C | SNP | 0 0 | 0 1 | 280  | 5 8  |
| Chr10 | 47822269 | 47822269 | C | T | SNP | 0 0 | 0 1 | 230  | 2 6  |
| Chr10 | 47822289 | 47822289 | A | T | SNP | 0 0 | 0 1 | 200  | 2 9  |
| Chr10 | 47823575 | 47823575 | A | G | SNP | 0 0 | 0 1 | 190  | 1 7  |
| Chr10 | 47823709 | 47823709 | T | G | SNP | 0 0 | 0 1 | 300  | 5 8  |
| Chr10 | 47823911 | 47823911 | T | C | SNP | 0 0 | 0 1 | 290  | 8 10 |
| Chr10 | 47824046 | 47824046 | C | T | SNP | 1 1 | 0 1 | 0 41 | 8 11 |
| Chr10 | 47824386 | 47824386 | A | G | SNP | 0 0 | 0 1 | 480  | 1 15 |
| Chr10 | 47824510 | 47824510 | T | C | SNP | 0 0 | 0 1 | 420  | 2 12 |
| Chr10 | 47826214 | 47826214 | T | C | SNP | 0 0 | 0 1 | 240  | 2 9  |
| Chr10 | 47828402 | 47828402 | G | C | SNP | 0 0 | 0 1 | 290  | 3 11 |
| Chr10 | 47828801 | 47828801 | C | T | SNP | 0 0 | 0 1 | 52 1 | 4 9  |
| Chr10 | 47828904 | 47828904 | T | A | SNP | 0 0 | 0 1 | 49 1 | 7 10 |
| Chr10 | 47830191 | 47830191 | C | T | SNP | 0 0 | 0 1 | 410  | 6 10 |
| Chr10 | 47833366 | 47833366 | A | G | SNP | 0 0 | 0 1 | 48 1 | 5 10 |
| Chr10 | 47835262 | 47835262 | C | T | SNP | 0 0 | 0 1 | 150  | 4 9  |
| Chr10 | 47838725 | 47838725 | A | G | SNP | 0 0 | 0 1 | 440  | 4 13 |
| Chr10 | 47839827 | 47839827 | C | G | SNP | 0 0 | 0 1 | 240  | 6 8  |
| Chr10 | 47841559 | 47841559 | C | T | SNP | 0 0 | 0 1 | 220  | 4 11 |
| Chr10 | 47841606 | 47841606 | G | T | SNP | 0 0 | 0 1 | 290  | 6 12 |
| Chr10 | 47841781 | 47841781 | T | A | SNP | 0 0 | 0 1 | 320  | 1 7  |

|       |          |          |   |   |     |     |     |      |       |
|-------|----------|----------|---|---|-----|-----|-----|------|-------|
| Chr10 | 47841782 | 47841782 | C | T | SNP | 0 0 | 0 1 | 32 0 | 1 7   |
| Chr10 | 47841803 | 47841803 | G | A | SNP | 0 0 | 0 1 | 22 0 | 1 7   |
| Chr10 | 47841857 | 47841857 | A | G | SNP | 0 0 | 0 1 | 27 0 | 2 8   |
| Chr10 | 47842010 | 47842010 | C | G | SNP | 0 0 | 0 1 | 42 0 | 4 11  |
| Chr10 | 47842229 | 47842229 | G | A | SNP | 0 0 | 0 1 | 42 0 | 3 5   |
| Chr10 | 47844235 | 47844235 | T | A | SNP | 0 0 | 0 1 | 18 0 | 8 10  |
| Chr10 | 47844240 | 47844240 | T | C | SNP | 0 0 | 0 1 | 18 0 | 8 10  |
| Chr10 | 47844318 | 47844318 | A | G | SNP | 0 0 | 0 1 | 27 0 | 8 10  |
| Chr10 | 47844622 | 47844622 | T | G | SNP | 0 0 | 0 1 | 51 0 | 9 8   |
| Chr10 | 47844639 | 47844639 | A | C | SNP | 0 0 | 0 1 | 45 0 | 8 7   |
| Chr10 | 47844687 | 47844687 | T | A | SNP | 0 0 | 0 1 | 43 0 | 6 8   |
| Chr10 | 47844751 | 47844751 | G | A | SNP | 0 0 | 0 1 | 42 0 | 3 9   |
| Chr10 | 47845493 | 47845493 | C | G | SNP | 0 0 | 0 1 | 37 0 | 8 10  |
| Chr10 | 47846241 | 47846241 | T | A | SNP | 0 0 | 0 1 | 38 0 | 6 10  |
| Chr10 | 47848108 | 47848108 | G | A | SNP | 0 0 | 0 1 | 52 0 | 3 21  |
| Chr10 | 47848609 | 47848609 | A | G | SNP | 0 0 | 0 1 | 14 0 | 4 5   |
| Chr10 | 47848881 | 47848881 | T | C | SNP | 0 0 | 0 1 | 31 0 | 5 5   |
| Chr10 | 47848975 | 47848975 | C | T | SNP | 0 0 | 0 1 | 32 1 | 4 9   |
| Chr10 | 47848979 | 47848979 | C | G | SNP | 0 0 | 0 1 | 36 1 | 4 8   |
| Chr10 | 47849033 | 47849033 | C | T | SNP | 0 0 | 0 1 | 39 1 | 1 7   |
| Chr10 | 47849102 | 47849102 | A | G | SNP | 0 0 | 0 1 | 43 1 | 2 10  |
| Chr10 | 47849117 | 47849117 | A | G | SNP | 0 0 | 0 1 | 41 1 | 3 10  |
| Chr10 | 47850572 | 47850572 | T | C | SNP | 0 0 | 0 1 | 63 0 | 2 15  |
| Chr10 | 47850725 | 47850725 | C | T | SNP | 0 0 | 0 1 | 32 0 | 5 11  |
| Chr10 | 47851277 | 47851277 | A | G | SNP | 0 0 | 0 1 | 52 0 | 11 16 |
| Chr10 | 47851585 | 47851585 | T | C | SNP | 0 0 | 0 1 | 46 0 | 6 20  |
| Chr10 | 47851902 | 47851902 | G | A | SNP | 0 0 | 0 1 | 44 0 | 3 21  |
| Chr10 | 47852029 | 47852029 | T | A | SNP | 0 0 | 0 1 | 37 0 | 7 16  |
| Chr10 | 47852154 | 47852154 | A | G | SNP | 0 0 | 0 1 | 36 0 | 4 20  |
| Chr10 | 47852598 | 47852598 | T | C | SNP | 0 0 | 0 1 | 39 0 | 6 11  |
| Chr10 | 47852638 | 47852638 | C | G | SNP | 0 0 | 0 1 | 50 0 | 7 11  |
| Chr10 | 47852648 | 47852648 | G | A | SNP | 0 0 | 0 1 | 52 0 | 8 11  |
| Chr10 | 47852720 | 47852720 | C | T | SNP | 0 0 | 0 1 | 50 0 | 9 12  |
| Chr10 | 47853101 | 47853101 | T | C | SNP | 0 0 | 0 1 | 67 1 | 8 9   |
| Chr10 | 47853629 | 47853629 | C | A | SNP | 0 0 | 0 1 | 44 0 | 5 14  |
| Chr10 | 47853648 | 47853648 | C | A | SNP | 0 0 | 0 1 | 47 0 | 6 12  |
| Chr10 | 47853791 | 47853791 | A | T | SNP | 0 0 | 0 1 | 70 0 | 4 10  |
| Chr10 | 47854529 | 47854529 | C | T | SNP | 0 0 | 0 1 | 32 0 | 4 12  |
| Chr10 | 47854812 | 47854812 | C | T | SNP | 0 0 | 0 1 | 37 0 | 1 10  |
| Chr10 | 47854907 | 47854907 | T | C | SNP | 0 0 | 0 1 | 43 0 | 3 14  |
| Chr10 | 47854941 | 47854941 | A | G | SNP | 0 0 | 0 1 | 45 0 | 4 13  |
| Chr10 | 47855011 | 47855011 | G | A | SNP | 0 0 | 0 1 | 61 0 | 1 8   |

|       |          |          |   |   |     |     |     |      |       |
|-------|----------|----------|---|---|-----|-----|-----|------|-------|
| Chr10 | 47855400 | 47855400 | A | G | SNP | 0 0 | 0 1 | 67 1 | 5 15  |
| Chr10 | 47855484 | 47855484 | G | A | SNP | 0 0 | 0 1 | 61 2 | 6 8   |
| Chr10 | 47855515 | 47855515 | A | G | SNP | 0 0 | 0 1 | 56 2 | 5 8   |
| Chr10 | 47855548 | 47855548 | A | G | SNP | 0 0 | 0 1 | 45 1 | 10 7  |
| Chr10 | 47855571 | 47855571 | C | T | SNP | 0 0 | 0 1 | 48 1 | 12 7  |
| Chr10 | 47855582 | 47855582 | G | T | SNP | 0 0 | 0 1 | 48 1 | 12 7  |
| Chr10 | 47855589 | 47855589 | T | C | SNP | 0 0 | 0 1 | 48 1 | 9 9   |
| Chr10 | 47855614 | 47855614 | A | G | SNP | 0 0 | 0 1 | 40 0 | 8 10  |
| Chr10 | 47855647 | 47855647 | C | G | SNP | 0 0 | 0 1 | 45 1 | 9 9   |
| Chr10 | 47855792 | 47855792 | G | A | SNP | 0 0 | 0 1 | 52 0 | 9 12  |
| Chr10 | 47855827 | 47855827 | G | A | SNP | 0 0 | 0 1 | 53 0 | 8 9   |
| Chr10 | 47855873 | 47855873 | C | T | SNP | 0 0 | 0 1 | 52 0 | 8 12  |
| Chr10 | 47855951 | 47855951 | C | G | SNP | 0 0 | 0 1 | 43 0 | 3 10  |
| Chr10 | 47856069 | 47856069 | A | C | SNP | 0 0 | 0 1 | 34 0 | 2 8   |
| Chr10 | 47856092 | 47856092 | A | G | SNP | 0 0 | 0 1 | 33 0 | 2 7   |
| Chr10 | 47856355 | 47856355 | A | T | SNP | 0 0 | 0 1 | 24 0 | 2 8   |
| Chr10 | 47856584 | 47856584 | A | C | SNP | 0 0 | 0 1 | 34 0 | 2 20  |
| Chr10 | 47856724 | 47856724 | A | T | SNP | 0 0 | 0 1 | 51 0 | 6 23  |
| Chr10 | 47857581 | 47857581 | A | G | SNP | 0 0 | 0 1 | 29 0 | 3 8   |
| Chr10 | 47857766 | 47857766 | G | A | SNP | 0 0 | 0 1 | 50 0 | 4 8   |
| Chr10 | 47857815 | 47857815 | T | C | SNP | 0 0 | 0 1 | 56 0 | 6 7   |
| Chr10 | 47857863 | 47857863 | C | G | SNP | 0 0 | 0 1 | 54 0 | 6 8   |
| Chr10 | 47858188 | 47858188 | C | T | SNP | 0 0 | 0 1 | 50 0 | 9 10  |
| Chr10 | 47858853 | 47858853 | T | C | SNP | 0 0 | 0 1 | 65 0 | 11 17 |
| Chr10 | 47858866 | 47858866 | G | T | SNP | 0 0 | 0 1 | 69 0 | 11 19 |
| Chr10 | 47858939 | 47858939 | T | C | SNP | 0 0 | 0 1 | 85 0 | 9 20  |
| Chr10 | 47860692 | 47860692 | A | G | SNP | 0 0 | 0 1 | 19 0 | 4 7   |
| Chr10 | 47860734 | 47860734 | T | G | SNP | 0 0 | 0 1 | 16 0 | 2 6   |
| Chr10 | 47860871 | 47860871 | A | C | SNP | 0 0 | 0 1 | 27 0 | 6 10  |
| Chr10 | 47861061 | 47861061 | G | A | SNP | 0 0 | 0 1 | 39 0 | 3 7   |
| Chr10 | 47861068 | 47861068 | A | G | SNP | 0 0 | 0 1 | 40 0 | 3 7   |
| Chr10 | 47861209 | 47861209 | G | C | SNP | 0 0 | 0 1 | 55 0 | 4 8   |
| Chr10 | 47861233 | 47861233 | C | T | SNP | 0 0 | 0 1 | 44 0 | 5 9   |
| Chr10 | 47861856 | 47861856 | A | G | SNP | 0 0 | 0 1 | 65 0 | 10 17 |
| Chr10 | 47861941 | 47861941 | G | A | SNP | 0 0 | 0 1 | 55 0 | 5 10  |
| Chr10 | 47861944 | 47861944 | T | A | SNP | 0 0 | 0 1 | 54 0 | 5 10  |
| Chr10 | 47862251 | 47862251 | A | C | SNP | 0 0 | 0 1 | 47 0 | 4 10  |
| Chr10 | 47862313 | 47862313 | A | G | SNP | 0 0 | 0 1 | 50 0 | 4 12  |
| Chr10 | 47862341 | 47862341 | G | A | SNP | 0 0 | 0 1 | 50 0 | 5 14  |
| Chr10 | 47862461 | 47862461 | C | G | SNP | 0 0 | 0 1 | 44 0 | 9 18  |
| Chr10 | 47862962 | 47862962 | G | T | SNP | 0 0 | 0 1 | 39 0 | 4 18  |
| Chr10 | 47863055 | 47863055 | G | A | SNP | 0 0 | 0 1 | 38 0 | 4 13  |

|       |          |          |   |   |     |     |     |      |      |
|-------|----------|----------|---|---|-----|-----|-----|------|------|
| Chr10 | 47864435 | 47864435 | C | T | SNP | 0 0 | 0 1 | 38 0 | 7 10 |
| Chr10 | 47864552 | 47864552 | T | A | SNP | 0 0 | 0 1 | 37 0 | 2 12 |
| Chr10 | 47864658 | 47864658 | C | T | SNP | 0 0 | 0 1 | 45 0 | 5 19 |
| Chr10 | 47864797 | 47864797 | C | T | SNP | 0 0 | 0 1 | 44 0 | 3 8  |
| Chr10 | 47865145 | 47865145 | C | T | SNP | 0 0 | 0 1 | 41 0 | 3 13 |
| Chr10 | 47865248 | 47865248 | C | T | SNP | 0 0 | 0 1 | 44 0 | 3 9  |
| Chr10 | 47865891 | 47865891 | A | C | SNP | 0 0 | 0 1 | 43 0 | 4 15 |
| Chr10 | 47866060 | 47866060 | A | G | SNP | 0 0 | 0 1 | 63 0 | 3 9  |
| Chr10 | 47866279 | 47866279 | T | C | SNP | 0 0 | 0 1 | 42 0 | 5 8  |
| Chr10 | 47866368 | 47866368 | G | A | SNP | 0 0 | 0 1 | 27 1 | 4 15 |
| Chr10 | 47867329 | 47867329 | A | T | SNP | 0 0 | 0 1 | 31 0 | 2 6  |
| Chr10 | 47868127 | 47868127 | G | A | SNP | 0 0 | 0 1 | 41 0 | 5 8  |
| Chr10 | 47868513 | 47868513 | T | G | SNP | 0 0 | 0 1 | 30 0 | 2 6  |
| Chr10 | 47869618 | 47869618 | A | G | SNP | 0 0 | 0 1 | 57 0 | 1 12 |
| Chr10 | 47869872 | 47869872 | C | T | SNP | 0 0 | 0 1 | 39 0 | 2 12 |
| Chr10 | 47871389 | 47871389 | A | G | SNP | 0 0 | 0 1 | 38 0 | 2 14 |
| Chr10 | 47871903 | 47871903 | C | T | SNP | 0 0 | 0 1 | 44 0 | 4 6  |
| Chr10 | 47871997 | 47871997 | T | C | SNP | 0 0 | 0 1 | 46 0 | 4 9  |
| Chr10 | 47872310 | 47872310 | G | A | SNP | 0 0 | 0 1 | 44 0 | 7 17 |
| Chr10 | 47872447 | 47872447 | A | G | SNP | 0 0 | 0 1 | 57 0 | 5 20 |
| Chr10 | 47872597 | 47872597 | C | T | SNP | 0 0 | 0 1 | 63 0 | 6 23 |
| Chr10 | 47873002 | 47873002 | A | G | SNP | 0 0 | 0 1 | 54 0 | 6 10 |
| Chr10 | 47873105 | 47873105 | G | T | SNP | 0 0 | 0 1 | 55 1 | 2 17 |
| Chr10 | 47873231 | 47873231 | T | C | SNP | 0 0 | 0 1 | 65 1 | 4 14 |
| Chr10 | 47873270 | 47873270 | T | C | SNP | 0 0 | 0 1 | 69 0 | 3 13 |
| Chr10 | 47873272 | 47873272 | T | C | SNP | 0 0 | 0 1 | 69 0 | 3 13 |
| Chr10 | 47874335 | 47874335 | T | G | SNP | 0 0 | 0 1 | 20 0 | 3 8  |
| Chr10 | 47876087 | 47876087 | C | T | SNP | 0 0 | 0 1 | 57 0 | 6 14 |
| Chr10 | 47877454 | 47877454 | C | T | SNP | 0 0 | 0 1 | 26 0 | 5 9  |
| Chr10 | 47878949 | 47878949 | G | T | SNP | 0 0 | 1 1 | 30 0 | 0 9  |
| Chr10 | 47881732 | 47881732 | A | C | SNP | 0 0 | 0 1 | 54 0 | 4 11 |
| Chr10 | 47881813 | 47881813 | T | G | SNP | 0 0 | 0 1 | 34 0 | 3 12 |
| Chr10 | 47884238 | 47884238 | A | T | SNP | 0 0 | 0 1 | 11 0 | 3 5  |
| Chr10 | 47885081 | 47885081 | A | G | SNP | 0 0 | 0 1 | 10 0 | 6 6  |
| Chr10 | 47885473 | 47885473 | C | T | SNP | 0 0 | 0 1 | 8 0  | 3 5  |
| Chr10 | 47885789 | 47885789 | T | A | SNP | 0 0 | 0 1 | 20 0 | 3 5  |
| Chr10 | 47886118 | 47886118 | G | A | SNP | 0 0 | 0 1 | 34 0 | 4 5  |
| Chr10 | 47886249 | 47886249 | G | T | SNP | 0 0 | 0 1 | 49 0 | 5 8  |
| Chr10 | 47888620 | 47888620 | G | A | SNP | 0 0 | 0 1 | 25 0 | 4 6  |
| Chr10 | 47890256 | 47890256 | G | A | SNP | 0 0 | 1 1 | 42 0 | 0 9  |
| Chr10 | 47890374 | 47890374 | T | C | SNP | 0 0 | 0 1 | 49 1 | 1 10 |
| Chr10 | 47892507 | 47892507 | G | T | SNP | 0 0 | 0 1 | 29 0 | 3 9  |

|       |          |          |   |   |     |     |     |      |       |
|-------|----------|----------|---|---|-----|-----|-----|------|-------|
| Chr10 | 47894676 | 47894676 | T | A | SNP | 0 0 | 0 1 | 510  | 6 14  |
| Chr10 | 47894680 | 47894680 | C | A | SNP | 0 0 | 0 1 | 520  | 6 14  |
| Chr10 | 47896398 | 47896398 | C | A | SNP | 0 0 | 0 1 | 30 1 | 4 7   |
| Chr10 | 47897262 | 47897262 | A | C | SNP | 0 0 | 0 1 | 33 0 | 3 5   |
| Chr10 | 47897351 | 47897351 | T | C | SNP | 0 0 | 0 1 | 38 0 | 4 4   |
| Chr10 | 47902453 | 47902453 | G | A | SNP | 0 0 | 0 1 | 63 0 | 5 18  |
| Chr10 | 47909564 | 47909564 | T | C | SNP | 0 0 | 0 1 | 71 0 | 5 17  |
| Chr10 | 47911215 | 47911215 | T | C | SNP | 0 0 | 0 1 | 14 0 | 1 8   |
| Chr10 | 47912561 | 47912561 | G | T | SNP | 0 0 | 0 1 | 26 0 | 1 12  |
| Chr10 | 47912619 | 47912619 | G | A | SNP | 0 0 | 0 1 | 18 0 | 1 10  |
| Chr10 | 47913718 | 47913718 | A | T | SNP | 0 0 | 0 1 | 37 0 | 3 14  |
| Chr10 | 47914256 | 47914256 | A | T | SNP | 0 0 | 0 1 | 51 0 | 2 18  |
| Chr10 | 47914452 | 47914452 | T | A | SNP | 0 0 | 0 1 | 53 1 | 3 15  |
| Chr10 | 47914515 | 47914515 | C | T | SNP | 0 0 | 1 1 | 57 1 | 0 17  |
| Chr10 | 47914528 | 47914528 | C | T | SNP | 0 0 | 1 1 | 59 1 | 0 18  |
| Chr10 | 47914672 | 47914672 | A | C | SNP | 0 0 | 0 1 | 59 3 | 4 11  |
| Chr10 | 47914809 | 47914809 | G | T | SNP | 0 0 | 0 1 | 62 0 | 5 18  |
| Chr10 | 47914887 | 47914887 | C | A | SNP | 0 0 | 0 1 | 60 0 | 5 19  |
| Chr10 | 47914897 | 47914897 | T | G | SNP | 0 0 | 0 1 | 59 0 | 5 18  |
| Chr10 | 47914986 | 47914986 | C | A | SNP | 0 0 | 0 1 | 52 0 | 8 15  |
| Chr10 | 47914999 | 47914999 | G | T | SNP | 0 0 | 0 1 | 50 0 | 8 13  |
| Chr10 | 47915108 | 47915108 | T | C | SNP | 0 0 | 0 1 | 77 0 | 5 9   |
| Chr10 | 47915280 | 47915280 | G | A | SNP | 0 0 | 0 1 | 49 0 | 7 12  |
| Chr10 | 47915404 | 47915404 | T | G | SNP | 0 0 | 0 1 | 75 0 | 9 19  |
| Chr10 | 47915591 | 47915591 | C | T | SNP | 0 0 | 0 1 | 44 0 | 12 15 |
| Chr10 | 47915748 | 47915748 | C | A | SNP | 0 0 | 0 1 | 29 0 | 3 15  |
| Chr10 | 47916538 | 47916538 | G | C | SNP | 0 0 | 0 1 | 33 0 | 5 12  |
| Chr10 | 47918346 | 47918346 | G | T | SNP | 0 0 | 0 1 | 41 0 | 6 15  |
| Chr10 | 47918357 | 47918357 | C | A | SNP | 0 0 | 0 1 | 37 0 | 6 18  |
| Chr10 | 47919875 | 47919875 | T | C | SNP | 0 0 | 0 1 | 48 1 | 4 9   |
| Chr10 | 47919995 | 47919995 | A | G | SNP | 0 0 | 0 1 | 51 0 | 5 13  |
| Chr10 | 47920059 | 47920059 | G | A | SNP | 0 0 | 0 1 | 63 0 | 5 13  |
| Chr10 | 47920291 | 47920291 | C | T | SNP | 0 0 | 0 1 | 44 0 | 5 13  |
| Chr10 | 47920602 | 47920602 | A | G | SNP | 0 0 | 0 1 | 19 0 | 2 6   |
| Chr10 | 47922672 | 47922672 | G | A | SNP | 0 0 | 0 1 | 65 0 | 8 18  |
| Chr10 | 47922971 | 47922971 | C | T | SNP | 0 0 | 0 1 | 36 0 | 9 6   |
| Chr10 | 47924243 | 47924243 | G | A | SNP | 0 0 | 0 1 | 76 0 | 6 21  |
| Chr10 | 47924842 | 47924842 | T | C | SNP | 0 0 | 0 1 | 61 1 | 5 5   |
| Chr10 | 47924986 | 47924986 | A | C | SNP | 0 0 | 0 1 | 44 0 | 5 8   |
| Chr10 | 47925184 | 47925184 | A | T | SNP | 0 0 | 0 1 | 63 0 | 15 7  |
| Chr10 | 47925782 | 47925782 | C | A | SNP | 0 0 | 0 1 | 66 1 | 5 10  |
| Chr10 | 47925845 | 47925845 | C | T | SNP | 0 0 | 0 1 | 66 0 | 4 15  |

|       |          |          |   |   |     |     |     |     |      |
|-------|----------|----------|---|---|-----|-----|-----|-----|------|
| Chr10 | 47926476 | 47926476 | G | A | SNP | 0 0 | 0 1 | 490 | 6 11 |
| Chr10 | 47927394 | 47927394 | A | T | SNP | 0 0 | 0 1 | 490 | 4 10 |
| Chr10 | 47927405 | 47927405 | C | T | SNP | 0 0 | 0 1 | 480 | 4 9  |
| Chr10 | 47928200 | 47928200 | T | C | SNP | 0 0 | 0 1 | 230 | 5 8  |
| Chr10 | 47928285 | 47928285 | A | G | SNP | 0 0 | 0 1 | 380 | 3 5  |
| Chr10 | 47929384 | 47929384 | G | C | SNP | 0 0 | 0 1 | 531 | 4 10 |
| Chr10 | 47929839 | 47929839 | A | G | SNP | 0 0 | 0 1 | 530 | 9 11 |
| Chr10 | 47930036 | 47930036 | C | T | SNP | 0 0 | 0 1 | 621 | 7 18 |
| Chr10 | 47931409 | 47931409 | G | A | SNP | 0 0 | 0 1 | 550 | 3 17 |
| Chr10 | 47931708 | 47931708 | C | G | SNP | 0 0 | 0 1 | 631 | 8 15 |
| Chr10 | 47931991 | 47931991 | T | C | SNP | 0 0 | 0 1 | 620 | 9 11 |
| Chr10 | 47932566 | 47932566 | T | A | SNP | 0 0 | 0 1 | 290 | 1 11 |
| Chr10 | 47932630 | 47932630 | G | T | SNP | 0 0 | 0 1 | 410 | 2 12 |
| Chr10 | 47932728 | 47932728 | C | T | SNP | 0 0 | 0 1 | 600 | 1 9  |
| Chr10 | 47933238 | 47933238 | T | C | SNP | 0 0 | 0 1 | 270 | 1 11 |
| Chr10 | 47933310 | 47933310 | G | A | SNP | 0 0 | 0 1 | 280 | 1 7  |
| Chr10 | 47934575 | 47934575 | T | A | SNP | 0 0 | 0 1 | 240 | 8 6  |
| Chr10 | 47935195 | 47935195 | C | T | SNP | 0 0 | 0 1 | 250 | 5 5  |
| Chr10 | 47936705 | 47936705 | G | T | SNP | 0 0 | 0 1 | 430 | 7 17 |
| Chr10 | 47939686 | 47939686 | T | A | SNP | 0 0 | 0 1 | 300 | 4 10 |
| Chr10 | 47939703 | 47939703 | C | A | SNP | 0 0 | 0 1 | 320 | 4 13 |
| Chr10 | 47940932 | 47940932 | A | G | SNP | 0 0 | 0 1 | 530 | 4 18 |
| Chr10 | 47942368 | 47942368 | G | A | SNP | 0 0 | 0 1 | 560 | 5 15 |
| Chr10 | 47942570 | 47942570 | T | C | SNP | 0 0 | 0 1 | 581 | 5 14 |
| Chr10 | 47942933 | 47942933 | T | C | SNP | 0 0 | 0 1 | 470 | 6 13 |
| Chr10 | 47943082 | 47943082 | G | C | SNP | 0 0 | 0 1 | 350 | 5 18 |
| Chr10 | 47944350 | 47944350 | T | C | SNP | 0 0 | 0 1 | 592 | 6 23 |
| Chr10 | 47949363 | 47949363 | C | T | SNP | 0 0 | 1 1 | 180 | 0 9  |
| Chr10 | 47949553 | 47949553 | T | C | SNP | 0 0 | 0 1 | 410 | 2 10 |
| Chr10 | 47950173 | 47950173 | T | A | SNP | 0 0 | 0 1 | 490 | 2 11 |
| Chr10 | 47950306 | 47950306 | A | G | SNP | 0 0 | 0 1 | 440 | 3 12 |
| Chr10 | 47950432 | 47950432 | C | T | SNP | 0 0 | 0 1 | 320 | 1 7  |
| Chr10 | 47950860 | 47950860 | T | A | SNP | 0 0 | 0 1 | 272 | 3 7  |
| Chr10 | 47954816 | 47954816 | C | A | SNP | 0 0 | 0 1 | 530 | 4 14 |
| Chr10 | 47954954 | 47954954 | G | A | SNP | 0 0 | 0 1 | 570 | 1 16 |
| Chr10 | 47955088 | 47955088 | T | G | SNP | 0 0 | 0 1 | 410 | 7 8  |
| Chr10 | 47955089 | 47955089 | T | C | SNP | 0 0 | 0 1 | 410 | 8 8  |
| Chr10 | 47955090 | 47955090 | T | C | SNP | 0 0 | 0 1 | 420 | 8 8  |
| Chr10 | 47957907 | 47957907 | A | T | SNP | 0 0 | 0 1 | 630 | 6 8  |
| Chr10 | 47958116 | 47958116 | T | C | SNP | 0 0 | 0 1 | 600 | 7 14 |
| Chr10 | 47958731 | 47958731 | G | A | SNP | 0 0 | 0 1 | 390 | 3 9  |
| Chr10 | 47958771 | 47958771 | C | T | SNP | 0 0 | 0 1 | 320 | 7 13 |

|       |          |          |   |   |     |     |     |      |      |
|-------|----------|----------|---|---|-----|-----|-----|------|------|
| Chr10 | 47960928 | 47960928 | G | T | SNP | 0 0 | 0 1 | 36 1 | 8 7  |
| Chr10 | 47961242 | 47961242 | T | A | SNP | 0 0 | 0 1 | 48 2 | 4 17 |
| Chr10 | 47961404 | 47961404 | A | G | SNP | 0 0 | 0 1 | 49 0 | 4 7  |
| Chr10 | 47961621 | 47961621 | A | T | SNP | 0 0 | 0 1 | 21 0 | 10 6 |
| Chr10 | 47961962 | 47961962 | A | G | SNP | 0 0 | 0 1 | 37 2 | 4 5  |
| Chr10 | 47967393 | 47967393 | C | T | SNP | 0 0 | 0 1 | 25 0 | 4 16 |
| Chr10 | 47967423 | 47967423 | G | A | SNP | 0 0 | 0 1 | 27 0 | 5 18 |
| Chr10 | 47967458 | 47967458 | G | T | SNP | 0 0 | 0 1 | 22 0 | 4 17 |
| Chr10 | 47967470 | 47967470 | T | A | SNP | 0 0 | 0 1 | 24 0 | 4 17 |
| Chr10 | 47967496 | 47967496 | C | G | SNP | 0 0 | 0 1 | 24 0 | 5 13 |
| Chr10 | 47967534 | 47967534 | A | C | SNP | 0 0 | 0 1 | 18 0 | 3 7  |
| Chr10 | 47967882 | 47967882 | T | C | SNP | 0 0 | 0 1 | 19 0 | 3 5  |
| Chr10 | 47967900 | 47967900 | C | T | SNP | 0 0 | 0 1 | 17 0 | 5 5  |
| Chr10 | 47967909 | 47967909 | T | C | SNP | 0 0 | 0 1 | 17 0 | 5 5  |
| Chr10 | 47970006 | 47970006 | G | A | SNP | 0 0 | 0 1 | 75 0 | 5 16 |
| Chr10 | 47970966 | 47970966 | T | G | SNP | 0 0 | 0 1 | 34 0 | 3 12 |
| Chr10 | 47971099 | 47971099 | T | C | SNP | 0 0 | 0 1 | 50 0 | 8 4  |
| Chr10 | 47973530 | 47973530 | G | C | SNP | 0 0 | 0 1 | 59 0 | 3 17 |
| Chr10 | 47973605 | 47973605 | T | C | SNP | 0 0 | 0 1 | 60 0 | 5 13 |
| Chr10 | 47973723 | 47973723 | G | A | SNP | 0 0 | 0 1 | 53 0 | 4 9  |
| Chr10 | 47973731 | 47973731 | G | C | SNP | 0 0 | 0 1 | 55 0 | 4 9  |
| Chr10 | 47973977 | 47973977 | A | G | SNP | 0 0 | 0 1 | 71 0 | 4 9  |
| Chr10 | 47974244 | 47974244 | T | G | SNP | 0 0 | 0 1 | 55 1 | 7 11 |
| Chr10 | 47974294 | 47974294 | G | A | SNP | 0 0 | 0 1 | 46 1 | 6 13 |
| Chr10 | 47974422 | 47974422 | G | A | SNP | 0 0 | 0 1 | 33 0 | 3 16 |
| Chr10 | 47974442 | 47974442 | C | T | SNP | 0 0 | 0 1 | 33 0 | 3 15 |
| Chr10 | 47974554 | 47974554 | C | A | SNP | 0 0 | 1 1 | 54 0 | 1 24 |
| Chr10 | 47974701 | 47974701 | A | T | SNP | 0 0 | 0 1 | 40 0 | 4 10 |
| Chr10 | 47974727 | 47974727 | A | G | SNP | 0 0 | 0 1 | 38 0 | 5 11 |
| Chr10 | 47974882 | 47974882 | A | T | SNP | 0 0 | 0 1 | 61 0 | 3 13 |
| Chr10 | 47974928 | 47974928 | G | A | SNP | 0 0 | 0 1 | 56 0 | 2 13 |
| Chr10 | 47975056 | 47975056 | G | A | SNP | 0 0 | 0 1 | 42 0 | 6 15 |
| Chr10 | 47975105 | 47975105 | T | C | SNP | 0 0 | 0 1 | 48 0 | 5 12 |
| Chr10 | 47975185 | 47975185 | T | G | SNP | 0 0 | 0 1 | 49 1 | 4 17 |
| Chr10 | 47975462 | 47975462 | G | C | SNP | 0 0 | 0 1 | 57 0 | 1 17 |
| Chr10 | 47975872 | 47975872 | T | A | SNP | 0 0 | 0 1 | 52 0 | 5 16 |
| Chr10 | 47975874 | 47975874 | A | G | SNP | 0 0 | 0 1 | 53 0 | 7 17 |
| Chr10 | 47975889 | 47975889 | A | C | SNP | 0 0 | 0 1 | 51 0 | 8 14 |
| Chr10 | 47976053 | 47976053 | G | A | SNP | 0 0 | 1 1 | 49 0 | 0 26 |
| Chr10 | 47976075 | 47976075 | A | T | SNP | 0 0 | 1 1 | 51 0 | 0 22 |
| Chr10 | 47976136 | 47976136 | A | T | SNP | 0 0 | 0 1 | 35 0 | 2 18 |
| Chr10 | 47976549 | 47976549 | T | C | SNP | 0 0 | 1 1 | 18 0 | 1 16 |

|       |          |          |   |   |     |     |     |      |       |
|-------|----------|----------|---|---|-----|-----|-----|------|-------|
| Chr10 | 47976619 | 47976619 | T | A | SNP | 0 0 | 1 1 | 200  | 0 13  |
| Chr10 | 47976757 | 47976757 | C | G | SNP | 0 0 | 0 1 | 210  | 1 11  |
| Chr10 | 47976821 | 47976821 | A | T | SNP | 0 0 | 1 1 | 200  | 0 13  |
| Chr10 | 47977013 | 47977013 | G | A | SNP | 0 0 | 0 1 | 240  | 6 6   |
| Chr10 | 47977162 | 47977162 | A | T | SNP | 0 0 | 0 1 | 210  | 1 7   |
| Chr10 | 47979670 | 47979670 | C | T | SNP | 0 0 | 0 1 | 260  | 3 5   |
| Chr10 | 47981044 | 47981044 | T | C | SNP | 0 0 | 0 1 | 570  | 10 21 |
| Chr10 | 47981671 | 47981671 | C | T | SNP | 0 0 | 0 1 | 600  | 5 5   |
| Chr10 | 47981709 | 47981709 | T | A | SNP | 0 0 | 0 1 | 740  | 6 5   |
| Chr10 | 47982221 | 47982221 | C | A | SNP | 0 0 | 0 1 | 330  | 1 13  |
| Chr10 | 47982280 | 47982280 | A | C | SNP | 0 0 | 0 1 | 380  | 2 11  |
| Chr10 | 47983164 | 47983164 | T | C | SNP | 0 0 | 0 1 | 320  | 7 9   |
| Chr10 | 47984157 | 47984157 | C | G | SNP | 0 0 | 1 1 | 280  | 0 8   |
| Chr10 | 47984369 | 47984369 | C | T | SNP | 0 0 | 1 1 | 43 2 | 0 10  |
| Chr10 | 47984691 | 47984691 | C | T | SNP | 0 0 | 0 1 | 300  | 2 14  |
| Chr10 | 47984820 | 47984820 | T | C | SNP | 0 0 | 0 1 | 460  | 5 9   |
| Chr10 | 47984860 | 47984860 | C | G | SNP | 0 0 | 0 1 | 490  | 6 7   |
| Chr10 | 47984948 | 47984948 | T | C | SNP | 0 0 | 0 1 | 440  | 7 8   |
| Chr10 | 47984965 | 47984965 | G | A | SNP | 0 0 | 0 1 | 410  | 7 10  |
| Chr10 | 47984985 | 47984985 | T | C | SNP | 0 0 | 0 1 | 400  | 6 13  |
| Chr10 | 47985221 | 47985221 | C | A | SNP | 0 0 | 0 1 | 330  | 7 17  |
| Chr10 | 47985630 | 47985630 | T | A | SNP | 0 0 | 0 1 | 610  | 4 28  |
| Chr10 | 47985897 | 47985897 | T | C | SNP | 0 0 | 0 1 | 710  | 10 21 |
| Chr10 | 47986091 | 47986091 | C | T | SNP | 0 0 | 0 1 | 550  | 5 14  |
| Chr10 | 47986092 | 47986092 | G | A | SNP | 0 0 | 0 1 | 570  | 5 14  |
| Chr10 | 47986106 | 47986106 | T | G | SNP | 0 0 | 0 1 | 560  | 5 14  |
| Chr10 | 47986108 | 47986108 | A | C | SNP | 0 0 | 0 1 | 560  | 5 16  |
| Chr10 | 47986150 | 47986150 | T | C | SNP | 0 0 | 0 1 | 580  | 5 13  |
| Chr10 | 47986280 | 47986280 | T | C | SNP | 0 0 | 0 1 | 790  | 5 10  |
| Chr10 | 47986391 | 47986391 | A | G | SNP | 0 0 | 0 1 | 880  | 11 9  |
| Chr10 | 47986516 | 47986516 | C | T | SNP | 0 0 | 0 1 | 53 1 | 6 11  |
| Chr10 | 47986689 | 47986689 | A | G | SNP | 0 0 | 0 1 | 620  | 12 12 |
| Chr10 | 47986838 | 47986838 | A | T | SNP | 0 0 | 0 1 | 39 1 | 5 13  |
| Chr10 | 47987421 | 47987421 | T | C | SNP | 0 0 | 0 1 | 100  | 2 7   |
| Chr10 | 47987485 | 47987485 | T | G | SNP | 0 0 | 0 1 | 110  | 3 8   |
| Chr10 | 47987877 | 47987877 | G | A | SNP | 0 0 | 0 1 | 36 2 | 4 10  |
| Chr10 | 47988827 | 47988827 | T | G | SNP | 0 0 | 0 1 | 430  | 5 22  |
| Chr10 | 47988919 | 47988919 | C | A | SNP | 0 0 | 0 1 | 460  | 4 19  |
| Chr10 | 47989096 | 47989096 | C | T | SNP | 0 0 | 0 1 | 430  | 5 11  |
| Chr10 | 47990087 | 47990087 | G | A | SNP | 0 0 | 0 1 | 600  | 6 6   |
| Chr10 | 47990633 | 47990633 | G | T | SNP | 0 0 | 1 1 | 610  | 1 20  |
| Chr10 | 47990761 | 47990761 | T | C | SNP | 0 0 | 0 1 | 570  | 5 11  |



|       |          |          |   |   |     |     |     |     |       |
|-------|----------|----------|---|---|-----|-----|-----|-----|-------|
| Chr10 | 47990810 | 47990810 | T | C | SNP | 0 0 | 0 1 | 440 | 3 12  |
| Chr10 | 47990938 | 47990938 | A | C | SNP | 0 0 | 0 1 | 530 | 2 16  |
| Chr10 | 47991075 | 47991075 | T | A | SNP | 0 0 | 0 1 | 600 | 1 18  |
| Chr10 | 47991430 | 47991430 | T | A | SNP | 0 0 | 0 1 | 270 | 4 4   |
| Chr10 | 47991440 | 47991440 | A | G | SNP | 0 0 | 0 1 | 210 | 4 4   |
| Chr10 | 47992204 | 47992204 | T | C | SNP | 0 0 | 0 1 | 110 | 2 10  |
| Chr10 | 47992323 | 47992323 | A | G | SNP | 0 0 | 0 1 | 300 | 4 8   |
| Chr10 | 47992499 | 47992499 | T | C | SNP | 0 0 | 0 1 | 170 | 1 8   |
| Chr10 | 47993605 | 47993605 | G | C | SNP | 0 0 | 0 1 | 732 | 6 11  |
| Chr10 | 47994867 | 47994867 | A | C | SNP | 0 0 | 0 1 | 470 | 6 11  |
| Chr10 | 47995308 | 47995308 | G | A | SNP | 0 0 | 0 1 | 930 | 7 18  |
| Chr10 | 47995995 | 47995995 | T | A | SNP | 0 0 | 0 1 | 740 | 6 17  |
| Chr10 | 47996038 | 47996038 | C | A | SNP | 0 0 | 0 1 | 790 | 8 16  |
| Chr10 | 47996498 | 47996498 | T | A | SNP | 0 0 | 0 1 | 833 | 6 15  |
| Chr10 | 47997831 | 47997831 | C | T | SNP | 0 0 | 0 1 | 180 | 3 5   |
| Chr10 | 47997856 | 47997856 | C | T | SNP | 0 0 | 0 1 | 270 | 3 5   |
| Chr10 | 47997959 | 47997959 | A | C | SNP | 0 0 | 0 1 | 450 | 2 9   |
| Chr10 | 47998666 | 47998666 | T | A | SNP | 0 0 | 0 1 | 671 | 6 15  |
| Chr10 | 47998743 | 47998743 | G | A | SNP | 0 0 | 0 1 | 675 | 10 9  |
| Chr10 | 48000740 | 48000740 | C | A | SNP | 0 0 | 0 1 | 663 | 8 7   |
| Chr10 | 48000787 | 48000787 | A | G | SNP | 0 0 | 0 1 | 510 | 10 8  |
| Chr10 | 48002571 | 48002571 | T | A | SNP | 0 0 | 0 1 | 390 | 3 10  |
| Chr10 | 48002580 | 48002580 | A | G | SNP | 0 0 | 0 1 | 320 | 3 9   |
| Chr10 | 48002591 | 48002591 | C | A | SNP | 0 0 | 0 1 | 310 | 3 9   |
| Chr10 | 48002621 | 48002621 | T | C | SNP | 0 0 | 0 1 | 280 | 3 7   |
| Chr10 | 48002736 | 48002736 | C | A | SNP | 0 0 | 1 1 | 150 | 0 9   |
| Chr10 | 48003851 | 48003851 | T | A | SNP | 0 0 | 0 1 | 380 | 8 6   |
| Chr10 | 48003853 | 48003853 | A | C | SNP | 0 0 | 0 1 | 380 | 8 6   |
| Chr10 | 48004161 | 48004161 | A | T | SNP | 0 0 | 0 1 | 180 | 4 7   |
| Chr10 | 48004174 | 48004174 | C | G | SNP | 0 0 | 0 1 | 160 | 4 7   |
| Chr10 | 48004609 | 48004609 | G | A | SNP | 0 0 | 0 1 | 321 | 5 8   |
| Chr10 | 48004742 | 48004742 | C | T | SNP | 0 0 | 0 1 | 451 | 2 10  |
| Chr10 | 48004795 | 48004795 | T | G | SNP | 0 0 | 0 1 | 381 | 2 10  |
| Chr10 | 48004861 | 48004861 | C | A | SNP | 0 0 | 1 1 | 281 | 0 10  |
| Chr10 | 48005464 | 48005464 | A | C | SNP | 0 0 | 0 1 | 490 | 6 15  |
| Chr10 | 48005478 | 48005478 | T | A | SNP | 0 0 | 0 1 | 460 | 6 18  |
| Chr10 | 48005647 | 48005647 | C | A | SNP | 0 0 | 0 1 | 760 | 11 25 |
| Chr10 | 48005741 | 48005741 | G | A | SNP | 0 0 | 0 1 | 591 | 11 15 |
| Chr10 | 48006660 | 48006660 | T | A | SNP | 0 0 | 0 1 | 350 | 12 7  |
| Chr10 | 48006966 | 48006966 | A | G | SNP | 0 0 | 0 1 | 590 | 8 11  |
| Chr10 | 48007027 | 48007027 | A | G | SNP | 0 0 | 0 1 | 640 | 4 11  |
| Chr10 | 48008937 | 48008937 | T | G | SNP | 0 0 | 0 1 | 630 | 9 13  |

|       |          |          |   |   |     |     |     |      |       |
|-------|----------|----------|---|---|-----|-----|-----|------|-------|
| Chr10 | 48009970 | 48009970 | G | A | SNP | 0 0 | 0 1 | 41 2 | 2 10  |
| Chr10 | 48010213 | 48010213 | G | C | SNP | 0 0 | 0 1 | 45 1 | 4 8   |
| Chr10 | 48010278 | 48010278 | C | G | SNP | 0 0 | 0 1 | 33 0 | 7 5   |
| Chr10 | 48011117 | 48011117 | T | G | SNP | 0 0 | 0 1 | 13 0 | 2 6   |
| Chr10 | 48011191 | 48011191 | A | C | SNP | 0 0 | 1 1 | 11 0 | 0 11  |
| Chr10 | 48011239 | 48011239 | T | G | SNP | 0 0 | 1 1 | 14 0 | 0 11  |
| Chr10 | 48011339 | 48011339 | A | T | SNP | 0 0 | 0 1 | 10 0 | 2 7   |
| Chr10 | 48012018 | 48012018 | T | A | SNP | 0 0 | 0 1 | 46 2 | 6 11  |
| Chr10 | 48012074 | 48012074 | G | T | SNP | 0 0 | 0 1 | 34 0 | 5 12  |
| Chr10 | 48012886 | 48012886 | G | A | SNP | 0 0 | 0 1 | 75 0 | 5 10  |
| Chr10 | 48012917 | 48012917 | A | C | SNP | 0 0 | 0 1 | 70 0 | 4 9   |
| Chr10 | 48013782 | 48013782 | G | A | SNP | 0 0 | 0 1 | 42 0 | 1 12  |
| Chr10 | 48013787 | 48013787 | A | C | SNP | 0 0 | 0 1 | 44 0 | 1 12  |
| Chr10 | 48013807 | 48013807 | C | A | SNP | 0 0 | 0 1 | 37 0 | 1 16  |
| Chr10 | 48013945 | 48013945 | C | T | SNP | 0 0 | 0 1 | 65 0 | 9 12  |
| Chr10 | 48013984 | 48013984 | A | G | SNP | 0 0 | 0 1 | 66 6 | 10 9  |
| Chr10 | 48014288 | 48014288 | C | G | SNP | 0 0 | 0 1 | 41 0 | 8 13  |
| Chr10 | 48014458 | 48014458 | G | A | SNP | 0 0 | 0 1 | 40 0 | 5 11  |
| Chr10 | 48014760 | 48014760 | T | C | SNP | 0 0 | 0 1 | 47 0 | 5 7   |
| Chr10 | 48015123 | 48015123 | T | C | SNP | 0 0 | 0 1 | 43 1 | 6 16  |
| Chr10 | 48015666 | 48015666 | C | T | SNP | 0 0 | 0 1 | 56 0 | 5 20  |
| Chr10 | 48015938 | 48015938 | G | T | SNP | 0 0 | 0 1 | 55 0 | 5 17  |
| Chr10 | 48016464 | 48016464 | A | G | SNP | 0 0 | 0 1 | 39 0 | 3 7   |
| Chr10 | 48016489 | 48016489 | G | A | SNP | 0 0 | 0 1 | 45 0 | 3 10  |
| Chr10 | 48016522 | 48016522 | G | A | SNP | 0 0 | 0 1 | 46 0 | 4 13  |
| Chr10 | 48017177 | 48017177 | A | T | SNP | 0 0 | 0 1 | 61 2 | 5 8   |
| Chr10 | 48017424 | 48017424 | G | A | SNP | 0 0 | 0 1 | 64 2 | 10 14 |
| Chr10 | 48017446 | 48017446 | T | C | SNP | 0 0 | 0 1 | 66 2 | 9 17  |
| Chr10 | 48017555 | 48017555 | G | A | SNP | 0 0 | 0 1 | 66 0 | 5 16  |
| Chr10 | 48018227 | 48018227 | C | T | SNP | 0 0 | 0 1 | 47 2 | 3 10  |
| Chr10 | 48018233 | 48018233 | C | A | SNP | 0 0 | 0 1 | 47 2 | 3 10  |
| Chr10 | 48018247 | 48018247 | G | A | SNP | 0 0 | 0 1 | 45 2 | 3 10  |
| Chr10 | 48018944 | 48018944 | T | A | SNP | 0 0 | 0 1 | 19 0 | 1 14  |
| Chr10 | 48019000 | 48019000 | C | T | SNP | 0 0 | 1 1 | 16 1 | 0 10  |
| Chr10 | 48019626 | 48019626 | G | A | SNP | 0 0 | 0 1 | 43 1 | 4 7   |
| Chr10 | 48021587 | 48021587 | A | T | SNP | 0 0 | 1 1 | 26 0 | 0 9   |
| Chr10 | 48021601 | 48021601 | C | T | SNP | 0 0 | 1 1 | 27 0 | 0 8   |
| Chr10 | 48023525 | 48023525 | A | C | SNP | 0 0 | 1 1 | 15 0 | 0 10  |
| Chr10 | 48023563 | 48023563 | T | C | SNP | 0 0 | 1 1 | 17 0 | 0 9   |
| Chr10 | 48024059 | 48024059 | T | C | SNP | 0 0 | 0 1 | 29 1 | 6 3   |
| Chr10 | 48024120 | 48024120 | T | A | SNP | 0 0 | 0 1 | 30 0 | 5 4   |
| Chr10 | 48024453 | 48024453 | A | C | SNP | 0 0 | 0 1 | 30 0 | 3 5   |

|       |          |          |   |   |     |     |     |      |      |
|-------|----------|----------|---|---|-----|-----|-----|------|------|
| Chr10 | 48024467 | 48024467 | C | T | SNP | 0 0 | 0 1 | 33 0 | 4 6  |
| Chr10 | 48024468 | 48024468 | G | T | SNP | 0 0 | 0 1 | 33 0 | 4 6  |
| Chr10 | 48024494 | 48024494 | G | A | SNP | 0 0 | 0 1 | 34 0 | 2 6  |
| Chr10 | 48024503 | 48024503 | A | G | SNP | 0 0 | 0 1 | 34 0 | 2 6  |
| Chr10 | 48024508 | 48024508 | T | C | SNP | 0 0 | 0 1 | 34 0 | 2 6  |
| Chr10 | 48024514 | 48024514 | G | T | SNP | 0 0 | 0 1 | 35 0 | 2 6  |
| Chr10 | 48024519 | 48024519 | T | C | SNP | 0 0 | 0 1 | 37 0 | 2 7  |
| Chr10 | 48024520 | 48024520 | C | T | SNP | 0 0 | 0 1 | 37 0 | 2 7  |
| Chr10 | 48024536 | 48024536 | C | T | SNP | 0 0 | 0 1 | 40 0 | 2 6  |
| Chr10 | 48024561 | 48024561 | C | T | SNP | 0 0 | 0 1 | 39 0 | 2 6  |
| Chr10 | 48024587 | 48024587 | C | T | SNP | 0 0 | 0 1 | 46 0 | 2 6  |
| Chr10 | 48024590 | 48024590 | A | G | SNP | 0 0 | 0 1 | 47 0 | 2 6  |
| Chr10 | 48024596 | 48024596 | T | C | SNP | 0 0 | 0 1 | 52 0 | 3 6  |
| Chr10 | 48024598 | 48024598 | A | G | SNP | 0 0 | 0 1 | 52 0 | 3 6  |
| Chr10 | 48024599 | 48024599 | C | T | SNP | 0 0 | 0 1 | 52 0 | 3 6  |
| Chr10 | 48024611 | 48024611 | T | C | SNP | 0 0 | 0 1 | 52 0 | 4 5  |
| Chr10 | 48024612 | 48024612 | G | A | SNP | 0 0 | 0 1 | 52 0 | 4 5  |
| Chr10 | 48024618 | 48024618 | T | G | SNP | 0 0 | 0 1 | 54 0 | 3 5  |
| Chr10 | 48024631 | 48024631 | G | A | SNP | 0 0 | 0 1 | 58 0 | 3 5  |
| Chr10 | 48024636 | 48024636 | T | C | SNP | 0 0 | 0 1 | 56 0 | 3 5  |
| Chr10 | 48024726 | 48024726 | G | A | SNP | 0 0 | 0 1 | 42 0 | 4 5  |
| Chr10 | 48024737 | 48024737 | T | C | SNP | 0 0 | 0 1 | 43 0 | 4 5  |
| Chr10 | 48024738 | 48024738 | T | C | SNP | 0 0 | 0 1 | 43 0 | 4 5  |
| Chr10 | 48024750 | 48024750 | A | G | SNP | 0 0 | 0 1 | 43 0 | 3 5  |
| Chr10 | 48024755 | 48024755 | A | G | SNP | 0 0 | 0 1 | 42 0 | 3 5  |
| Chr10 | 48024760 | 48024760 | C | A | SNP | 0 0 | 0 1 | 42 0 | 3 5  |
| Chr10 | 48024761 | 48024761 | G | A | SNP | 0 0 | 0 1 | 42 0 | 3 5  |
| Chr10 | 48024769 | 48024769 | C | T | SNP | 0 0 | 0 1 | 36 0 | 3 5  |
| Chr10 | 48024779 | 48024779 | T | C | SNP | 0 0 | 0 1 | 39 0 | 3 5  |
| Chr10 | 48024832 | 48024832 | C | T | SNP | 0 0 | 0 1 | 37 0 | 1 7  |
| Chr10 | 48024835 | 48024835 | A | G | SNP | 0 0 | 0 1 | 37 0 | 1 7  |
| Chr10 | 48024840 | 48024840 | T | C | SNP | 0 0 | 0 1 | 35 0 | 1 7  |
| Chr10 | 48024843 | 48024843 | T | C | SNP | 0 0 | 0 1 | 35 0 | 1 7  |
| Chr10 | 48024898 | 48024898 | G | A | SNP | 0 0 | 0 1 | 17 0 | 3 5  |
| Chr10 | 48025293 | 48025293 | A | T | SNP | 0 0 | 0 1 | 30 1 | 3 8  |
| Chr10 | 48028290 | 48028290 | A | G | SNP | 0 0 | 0 1 | 48 0 | 3 14 |
| Chr10 | 48028489 | 48028489 | A | G | SNP | 0 0 | 0 1 | 34 0 | 5 7  |
| Chr10 | 48028509 | 48028509 | C | T | SNP | 0 0 | 0 1 | 35 0 | 4 6  |
| Chr10 | 48028647 | 48028647 | G | C | SNP | 0 0 | 0 1 | 22 0 | 4 9  |
| Chr10 | 48028746 | 48028746 | A | G | SNP | 0 0 | 0 1 | 27 0 | 2 8  |
| Chr10 | 48028760 | 48028760 | C | G | SNP | 0 0 | 0 1 | 25 0 | 2 8  |
| Chr10 | 48028768 | 48028768 | C | T | SNP | 0 0 | 0 1 | 27 0 | 1 8  |

|       |          |          |   |   |     |     |     |      |      |
|-------|----------|----------|---|---|-----|-----|-----|------|------|
| Chr10 | 48028773 | 48028773 | A | G | SNP | 0 0 | 0 1 | 27 0 | 1 8  |
| Chr10 | 48029773 | 48029773 | A | G | SNP | 0 0 | 0 1 | 23 1 | 5 10 |
| Chr10 | 48029809 | 48029809 | A | G | SNP | 0 0 | 0 1 | 24 1 | 6 11 |
| Chr10 | 48029843 | 48029843 | C | A | SNP | 0 0 | 0 1 | 25 1 | 5 10 |
| Chr10 | 48029921 | 48029921 | A | G | SNP | 0 1 | 0 1 | 32 3 | 6 8  |
| Chr10 | 48029930 | 48029930 | A | T | SNP | 0 0 | 0 1 | 35 2 | 5 7  |
| Chr10 | 48029989 | 48029989 | T | C | SNP | 0 0 | 0 1 | 40 2 | 6 4  |
| Chr10 | 48030033 | 48030033 | C | T | SNP | 0 0 | 0 1 | 40 1 | 3 6  |
| Chr10 | 48031220 | 48031220 | T | A | SNP | 0 0 | 0 1 | 43 0 | 7 15 |
| Chr10 | 48031323 | 48031323 | G | A | SNP | 0 0 | 0 1 | 14 0 | 4 12 |
| Chr10 | 48031337 | 48031337 | G | A | SNP | 0 0 | 0 1 | 16 0 | 4 11 |
| Chr10 | 48031344 | 48031344 | C | A | SNP | 0 0 | 0 1 | 17 0 | 4 11 |
| Chr10 | 48031357 | 48031357 | G | A | SNP | 0 0 | 0 1 | 21 0 | 4 9  |
| Chr10 | 48031365 | 48031365 | A | G | SNP | 0 0 | 0 1 | 26 0 | 4 7  |
| Chr10 | 48031385 | 48031385 | G | A | SNP | 0 0 | 0 1 | 25 0 | 2 9  |
| Chr10 | 48031396 | 48031396 | G | A | SNP | 0 0 | 1 1 | 25 0 | 0 10 |
| Chr10 | 48031407 | 48031407 | A | C | SNP | 0 0 | 1 1 | 27 0 | 0 10 |
| Chr10 | 48031423 | 48031423 | C | T | SNP | 0 0 | 1 1 | 21 0 | 0 9  |
| Chr10 | 48031458 | 48031458 | A | G | SNP | 0 0 | 0 1 | 27 0 | 1 8  |
| Chr10 | 48031476 | 48031476 | G | A | SNP | 0 0 | 0 1 | 34 0 | 1 8  |
| Chr10 | 48031507 | 48031507 | C | T | SNP | 0 0 | 0 1 | 32 0 | 1 7  |
| Chr10 | 48031512 | 48031512 | C | G | SNP | 0 0 | 0 1 | 27 0 | 1 7  |
| Chr10 | 48032196 | 48032196 | C | A | SNP | 0 0 | 0 1 | 45 1 | 8 13 |
| Chr10 | 48032336 | 48032336 | T | C | SNP | 0 1 | 0 1 | 41 3 | 3 10 |
| Chr10 | 48032341 | 48032341 | G | T | SNP | 0 1 | 0 1 | 39 2 | 4 10 |
| Chr10 | 48032750 | 48032750 | T | A | SNP | 0 0 | 0 1 | 33 1 | 3 12 |
| Chr10 | 48032815 | 48032815 | A | C | SNP | 0 0 | 0 1 | 21 1 | 5 14 |
| Chr10 | 48032836 | 48032836 | A | T | SNP | 0 0 | 0 1 | 20 0 | 3 12 |
| Chr10 | 48033048 | 48033048 | A | G | SNP | 0 0 | 0 1 | 26 0 | 5 9  |
| Chr10 | 48033136 | 48033136 | G | T | SNP | 0 0 | 0 1 | 31 0 | 6 9  |
| Chr10 | 48034731 | 48034731 | A | G | SNP | 0 0 | 0 1 | 60 0 | 6 12 |
| Chr10 | 48037028 | 48037028 | A | C | SNP | 0 0 | 0 1 | 14 0 | 2 7  |
| Chr10 | 48037861 | 48037861 | T | G | SNP | 0 0 | 0 1 | 25 1 | 4 11 |
| Chr10 | 48037874 | 48037874 | T | C | SNP | 0 0 | 0 1 | 28 1 | 4 11 |
| Chr10 | 48037884 | 48037884 | A | T | SNP | 0 0 | 0 1 | 33 1 | 4 11 |
| Chr10 | 48037887 | 48037887 | T | C | SNP | 0 0 | 0 1 | 33 1 | 4 11 |
| Chr10 | 48037901 | 48037901 | C | T | SNP | 0 0 | 0 1 | 34 1 | 3 9  |
| Chr10 | 48037932 | 48037932 | C | A | SNP | 0 0 | 0 1 | 35 0 | 3 6  |
| Chr10 | 48037958 | 48037958 | T | C | SNP | 0 0 | 0 1 | 36 0 | 4 6  |
| Chr10 | 48037960 | 48037960 | C | T | SNP | 0 0 | 0 1 | 36 0 | 4 6  |
| Chr10 | 48037966 | 48037966 | C | T | SNP | 0 0 | 0 1 | 36 0 | 3 8  |
| Chr10 | 48037975 | 48037975 | T | C | SNP | 0 0 | 0 1 | 34 0 | 3 6  |

|       |          |          |   |   |     |     |     |       |       |
|-------|----------|----------|---|---|-----|-----|-----|-------|-------|
| Chr10 | 48038002 | 48038002 | A | G | SNP | 0 0 | 0 1 | 28 0  | 3 5   |
| Chr10 | 48038060 | 48038060 | T | C | SNP | 0 0 | 0 1 | 40 0  | 7 6   |
| Chr10 | 48038062 | 48038062 | T | C | SNP | 0 0 | 0 1 | 41 0  | 7 6   |
| Chr10 | 48038072 | 48038072 | C | A | SNP | 0 0 | 0 1 | 45 0  | 7 6   |
| Chr10 | 48038100 | 48038100 | A | T | SNP | 0 0 | 0 1 | 51 0  | 5 6   |
| Chr10 | 48038738 | 48038738 | G | A | SNP | 0 1 | 0 1 | 27 2  | 6 7   |
| Chr10 | 48038791 | 48038791 | A | G | SNP | 0 0 | 0 1 | 32 1  | 6 5   |
| Chr10 | 48038809 | 48038809 | A | C | SNP | 0 0 | 0 1 | 38 1  | 6 3   |
| Chr10 | 48039507 | 48039507 | T | A | SNP | 0 0 | 0 1 | 8 0   | 5 3   |
| Chr10 | 48040421 | 48040421 | A | C | SNP | 0 0 | 0 1 | 31 2  | 4 14  |
| Chr10 | 48040772 | 48040772 | A | T | SNP | 0 0 | 0 1 | 29 1  | 7 9   |
| Chr10 | 48040773 | 48040773 | A | T | SNP | 0 0 | 0 1 | 29 1  | 7 8   |
| Chr10 | 48041973 | 48041973 | G | C | SNP | 0 0 | 0 1 | 39 0  | 8 6   |
| Chr10 | 48044223 | 48044223 | A | G | SNP | 0 0 | 0 1 | 33 0  | 1 13  |
| Chr10 | 48044316 | 48044316 | C | T | SNP | 0 0 | 0 1 | 20 0  | 2 18  |
| Chr10 | 48044353 | 48044353 | T | C | SNP | 0 0 | 0 1 | 18 0  | 3 8   |
| Chr10 | 48044369 | 48044369 | G | C | SNP | 0 0 | 0 1 | 17 0  | 2 7   |
| Chr10 | 48044562 | 48044562 | C | A | SNP | 0 1 | 0 1 | 9 2   | 2 6   |
| Chr10 | 48044570 | 48044570 | A | G | SNP | 0 1 | 0 1 | 10 2  | 3 6   |
| Chr10 | 48044598 | 48044598 | C | A | SNP | 0 1 | 0 1 | 17 2  | 3 7   |
| Chr10 | 48044651 | 48044651 | T | C | SNP | 0 0 | 0 1 | 21 1  | 3 7   |
| Chr10 | 48046332 | 48046332 | G | C | SNP | 0 0 | 0 1 | 46 1  | 6 22  |
| Chr10 | 48046336 | 48046336 | A | C | SNP | 0 0 | 0 1 | 45 1  | 5 22  |
| Chr10 | 48046593 | 48046593 | A | C | SNP | 0 0 | 0 1 | 39 0  | 7 11  |
| Chr10 | 48046644 | 48046644 | C | A | SNP | 0 0 | 0 1 | 27 0  | 1 8   |
| Chr10 | 48046664 | 48046664 | G | C | SNP | 0 0 | 0 1 | 27 0  | 3 7   |
| Chr10 | 48046692 | 48046692 | T | A | SNP | 0 0 | 0 1 | 21 0  | 2 8   |
| Chr10 | 48046905 | 48046905 | C | A | SNP | 0 0 | 0 1 | 24 0  | 5 4   |
| Chr10 | 48047199 | 48047199 | G | A | SNP | 0 0 | 0 1 | 27 0  | 4 7   |
| Chr10 | 48047954 | 48047954 | G | A | SNP | 0 0 | 0 1 | 54 1  | 10 17 |
| Chr10 | 48048004 | 48048004 | A | C | SNP | 0 0 | 0 1 | 50 1  | 9 12  |
| Chr10 | 48048149 | 48048149 | T | G | SNP | 0 0 | 0 1 | 44 1  | 10 15 |
| Chr10 | 48048177 | 48048177 | G | A | SNP | 0 0 | 0 1 | 48 1  | 10 15 |
| Chr10 | 48049214 | 48049214 | C | T | SNP | 0 0 | 0 1 | 45 2  | 4 5   |
| Chr10 | 48049218 | 48049218 | G | A | SNP | 0 0 | 0 1 | 47 2  | 4 5   |
| Chr10 | 48049617 | 48049617 | A | G | SNP | 0 0 | 0 1 | 27 0  | 4 8   |
| Chr10 | 48049915 | 48049915 | G | A | SNP | 0 0 | 0 1 | 66 2  | 5 13  |
| Chr10 | 48050029 | 48050029 | T | C | SNP | 0 1 | 0 1 | 67 10 | 9 16  |
| Chr10 | 48050388 | 48050388 | C | T | SNP | 0 0 | 0 1 | 65 3  | 13 14 |
| Chr10 | 48050435 | 48050435 | C | T | SNP | 0 0 | 0 1 | 50 3  | 8 10  |
| Chr10 | 48050644 | 48050644 | G | T | SNP | 0 0 | 0 1 | 50 1  | 2 25  |
| Chr10 | 48050868 | 48050868 | A | G | SNP | 0 0 | 0 1 | 46 2  | 4 12  |

|       |          |          |   |   |     |     |     |      |       |
|-------|----------|----------|---|---|-----|-----|-----|------|-------|
| Chr10 | 48050891 | 48050891 | C | T | SNP | 0 0 | 0 1 | 48 1 | 4 14  |
| Chr10 | 48051210 | 48051210 | C | T | SNP | 0 0 | 0 1 | 39 2 | 4 10  |
| Chr10 | 48053184 | 48053184 | T | A | SNP | 0 0 | 0 1 | 35 1 | 6 15  |
| Chr10 | 48053371 | 48053371 | G | C | SNP | 0 0 | 0 1 | 41 2 | 7 10  |
| Chr10 | 48054483 | 48054483 | C | T | SNP | 0 1 | 0 1 | 40 4 | 6 6   |
| Chr10 | 48058564 | 48058564 | T | G | SNP | 0 0 | 0 1 | 26 0 | 1 15  |
| Chr10 | 48058659 | 48058659 | G | A | SNP | 0 0 | 0 1 | 44 1 | 3 20  |
| Chr10 | 48059149 | 48059149 | T | C | SNP | 0 0 | 0 1 | 62 0 | 7 12  |
| Chr10 | 48060866 | 48060866 | A | T | SNP | 0 0 | 0 1 | 71 0 | 7 9   |
| Chr10 | 48061522 | 48061522 | A | T | SNP | 0 0 | 0 1 | 26 1 | 3 11  |
| Chr10 | 48063242 | 48063242 | C | T | SNP | 0 0 | 0 1 | 20 0 | 1 7   |
| Chr10 | 48066594 | 48066594 | C | T | SNP | 0 0 | 0 1 | 34 1 | 2 9   |
| Chr10 | 48066679 | 48066679 | C | T | SNP | 0 0 | 0 1 | 48 0 | 4 8   |
| Chr10 | 48066735 | 48066735 | C | T | SNP | 0 0 | 0 1 | 54 0 | 4 12  |
| Chr10 | 48066784 | 48066784 | G | A | SNP | 0 0 | 0 1 | 83 1 | 6 12  |
| Chr10 | 48066870 | 48066870 | G | A | SNP | 0 0 | 0 1 | 65 1 | 2 7   |
| Chr10 | 48067079 | 48067079 | C | T | SNP | 0 0 | 0 1 | 43 0 | 6 11  |
| Chr10 | 48068420 | 48068420 | G | A | SNP | 0 0 | 0 1 | 35 2 | 1 9   |
| Chr10 | 48068429 | 48068429 | G | A | SNP | 0 0 | 0 1 | 37 2 | 1 9   |
| Chr10 | 48068443 | 48068443 | C | T | SNP | 0 0 | 0 1 | 41 1 | 1 9   |
| Chr10 | 48068642 | 48068642 | T | C | SNP | 0 0 | 0 1 | 35 0 | 5 6   |
| Chr10 | 48068887 | 48068887 | T | A | SNP | 0 1 | 0 1 | 65 9 | 8 11  |
| Chr10 | 48069243 | 48069243 | A | C | SNP | 0 0 | 0 1 | 78 2 | 9 21  |
| Chr10 | 48069658 | 48069658 | T | C | SNP | 0 0 | 0 1 | 61 4 | 9 7   |
| Chr10 | 48069706 | 48069706 | G | A | SNP | 0 0 | 0 1 | 67 3 | 7 6   |
| Chr10 | 48069747 | 48069747 | T | C | SNP | 0 0 | 0 1 | 61 3 | 7 8   |
| Chr10 | 48069791 | 48069791 | C | A | SNP | 0 0 | 0 1 | 50 2 | 6 9   |
| Chr10 | 48069844 | 48069844 | A | G | SNP | 0 1 | 0 1 | 55 5 | 3 13  |
| Chr10 | 48069930 | 48069930 | A | T | SNP | 0 0 | 0 1 | 66 4 | 3 8   |
| Chr10 | 48070058 | 48070058 | A | T | SNP | 0 0 | 0 1 | 59 1 | 3 16  |
| Chr10 | 48070080 | 48070080 | T | A | SNP | 0 0 | 0 1 | 58 1 | 2 17  |
| Chr10 | 48070342 | 48070342 | T | A | SNP | 0 0 | 0 1 | 55 2 | 4 11  |
| Chr10 | 48070385 | 48070385 | G | T | SNP | 0 0 | 0 1 | 59 1 | 6 11  |
| Chr10 | 48070440 | 48070440 | G | A | SNP | 0 0 | 0 1 | 55 0 | 6 16  |
| Chr10 | 48070997 | 48070997 | G | C | SNP | 0 0 | 0 1 | 50 0 | 3 10  |
| Chr10 | 48071913 | 48071913 | G | A | SNP | 0 0 | 0 1 | 72 2 | 2 11  |
| Chr10 | 48076657 | 48076657 | G | T | SNP | 0 0 | 0 1 | 49 1 | 9 15  |
| Chr10 | 48076977 | 48076977 | T | C | SNP | 0 0 | 0 1 | 45 1 | 10 15 |
| Chr10 | 48079908 | 48079908 | T | A | SNP | 0 0 | 0 1 | 25 0 | 3 9   |
| Chr10 | 48080112 | 48080112 | A | T | SNP | 0 0 | 0 1 | 25 1 | 3 12  |
| Chr10 | 48080280 | 48080280 | C | T | SNP | 0 0 | 1 1 | 34 4 | 1 10  |
| Chr10 | 48081338 | 48081338 | G | C | SNP | 0 0 | 1 1 | 25 0 | 0 9   |

|       |          |          |   |   |     |     |     |       |       |
|-------|----------|----------|---|---|-----|-----|-----|-------|-------|
| Chr10 | 48081792 | 48081792 | C | T | SNP | 0 0 | 0 1 | 100   | 5 3   |
| Chr10 | 48081843 | 48081843 | G | A | SNP | 0 0 | 0 1 | 12 0  | 6 4   |
| Chr10 | 48081873 | 48081873 | G | A | SNP | 0 0 | 0 1 | 14 0  | 6 6   |
| Chr10 | 48086665 | 48086665 | A | G | SNP | 0 0 | 0 1 | 44 2  | 9 10  |
| Chr10 | 48086773 | 48086773 | A | C | SNP | 0 0 | 0 1 | 43 1  | 11 7  |
| Chr10 | 48087489 | 48087489 | A | G | SNP | 0 0 | 0 1 | 43 0  | 5 8   |
| Chr10 | 48089078 | 48089078 | G | A | SNP | 0 0 | 0 1 | 71 3  | 3 6   |
| Chr10 | 48089109 | 48089109 | A | G | SNP | 0 0 | 0 1 | 78 3  | 3 6   |
| Chr10 | 48089120 | 48089120 | A | G | SNP | 0 1 | 0 1 | 72 9  | 4 6   |
| Chr10 | 48089135 | 48089135 | A | C | SNP | 0 0 | 0 1 | 76 5  | 4 6   |
| Chr10 | 48094127 | 48094127 | G | A | SNP | 0 1 | 0 1 | 69 11 | 9 5   |
| Chr10 | 48097766 | 48097766 | G | T | SNP | 0 1 | 0 1 | 75 9  | 4 4   |
| Chr10 | 48098495 | 48098495 | T | C | SNP | 0 1 | 0 1 | 55 16 | 4 9   |
| Chr10 | 48098506 | 48098506 | T | G | SNP | 0 1 | 0 1 | 54 19 | 4 9   |
| Chr10 | 48098510 | 48098510 | C | T | SNP | 0 1 | 0 1 | 52 20 | 4 9   |
| Chr10 | 48098623 | 48098623 | T | C | SNP | 0 1 | 0 1 | 41 14 | 5 13  |
| Chr10 | 48101115 | 48101115 | A | G | SNP | 0 0 | 0 1 | 28 1  | 4 6   |
| Chr10 | 48101182 | 48101182 | G | A | SNP | 0 0 | 0 1 | 39 2  | 6 8   |
| Chr10 | 48101363 | 48101363 | T | G | SNP | 0 1 | 0 1 | 41 4  | 3 10  |
| Chr10 | 48101434 | 48101434 | A | G | SNP | 0 0 | 0 1 | 52 1  | 1 13  |
| Chr10 | 48102016 | 48102016 | C | A | SNP | 0 0 | 0 1 | 50 2  | 7 14  |
| Chr10 | 48102283 | 48102283 | C | A | SNP | 0 0 | 0 1 | 41 0  | 6 16  |
| Chr10 | 48102950 | 48102950 | C | G | SNP | 0 0 | 0 1 | 42 1  | 3 7   |
| Chr10 | 48103084 | 48103084 | C | A | SNP | 0 0 | 0 1 | 49 0  | 4 11  |
| Chr10 | 48103103 | 48103103 | C | A | SNP | 0 0 | 0 1 | 44 2  | 3 11  |
| Chr10 | 48103467 | 48103467 | T | A | SNP | 0 0 | 0 1 | 49 2  | 2 23  |
| Chr10 | 48103496 | 48103496 | T | G | SNP | 0 0 | 0 1 | 41 2  | 4 25  |
| Chr10 | 48104090 | 48104090 | A | C | SNP | 0 0 | 0 1 | 47 0  | 2 13  |
| Chr10 | 48104142 | 48104142 | A | C | SNP | 0 0 | 0 1 | 72 0  | 3 18  |
| Chr10 | 48104238 | 48104238 | A | T | SNP | 0 0 | 0 1 | 69 1  | 5 15  |
| Chr10 | 48104248 | 48104248 | C | G | SNP | 0 0 | 0 1 | 71 1  | 6 15  |
| Chr10 | 48108761 | 48108761 | A | T | SNP | 0 0 | 0 1 | 18 1  | 4 7   |
| Chr10 | 48108787 | 48108787 | T | C | SNP | 0 0 | 0 1 | 27 0  | 5 7   |
| Chr10 | 48109027 | 48109027 | C | T | SNP | 0 0 | 0 1 | 48 2  | 7 18  |
| Chr10 | 48109032 | 48109032 | T | C | SNP | 0 0 | 0 1 | 49 2  | 7 19  |
| Chr10 | 48109033 | 48109033 | C | A | SNP | 0 0 | 0 1 | 49 2  | 7 19  |
| Chr10 | 48109038 | 48109038 | A | T | SNP | 0 0 | 0 1 | 49 2  | 7 19  |
| Chr10 | 48109082 | 48109082 | C | G | SNP | 0 0 | 0 1 | 51 2  | 7 20  |
| Chr10 | 48109281 | 48109281 | T | G | SNP | 0 0 | 0 1 | 51 1  | 6 15  |
| Chr10 | 48109320 | 48109320 | G | C | SNP | 0 0 | 0 1 | 48 1  | 6 13  |
| Chr10 | 48109341 | 48109341 | T | G | SNP | 0 0 | 0 1 | 49 1  | 8 14  |
| Chr10 | 48109465 | 48109465 | A | C | SNP | 0 0 | 0 1 | 48 5  | 12 20 |

|       |          |          |   |   |     |     |     |      |       |
|-------|----------|----------|---|---|-----|-----|-----|------|-------|
| Chr10 | 48109580 | 48109580 | T | G | SNP | 0 0 | 0 1 | 54 0 | 5 19  |
| Chr10 | 48109602 | 48109602 | C | G | SNP | 0 0 | 0 1 | 53 0 | 4 14  |
| Chr10 | 48109606 | 48109606 | A | T | SNP | 0 0 | 0 1 | 53 0 | 5 15  |
| Chr10 | 48109634 | 48109634 | T | G | SNP | 0 0 | 0 1 | 56 0 | 6 11  |
| Chr10 | 48109637 | 48109637 | C | T | SNP | 0 0 | 0 1 | 54 0 | 6 11  |
| Chr10 | 48109640 | 48109640 | T | A | SNP | 0 0 | 0 1 | 53 0 | 7 10  |
| Chr10 | 48109699 | 48109699 | A | G | SNP | 0 0 | 0 1 | 65 0 | 9 7   |
| Chr10 | 48109884 | 48109884 | T | A | SNP | 0 0 | 0 1 | 27 0 | 3 6   |
| Chr10 | 48109891 | 48109891 | T | C | SNP | 0 0 | 0 1 | 24 0 | 3 6   |
| Chr10 | 48110179 | 48110179 | A | G | SNP | 0 0 | 0 1 | 49 2 | 6 18  |
| Chr10 | 48110186 | 48110186 | C | T | SNP | 0 0 | 0 1 | 50 2 | 6 18  |
| Chr10 | 48110229 | 48110229 | C | T | SNP | 0 0 | 0 1 | 42 3 | 5 17  |
| Chr10 | 48110288 | 48110288 | T | C | SNP | 0 0 | 0 1 | 50 3 | 3 12  |
| Chr10 | 48110333 | 48110333 | A | T | SNP | 0 0 | 0 1 | 44 3 | 2 8   |
| Chr10 | 48110335 | 48110335 | A | C | SNP | 0 0 | 0 1 | 44 3 | 2 9   |
| Chr10 | 48110340 | 48110340 | T | G | SNP | 0 0 | 0 1 | 48 3 | 3 9   |
| Chr10 | 48110346 | 48110346 | G | A | SNP | 0 0 | 0 1 | 47 2 | 3 10  |
| Chr10 | 48110370 | 48110370 | C | A | SNP | 0 0 | 0 1 | 51 1 | 4 8   |
| Chr10 | 48110375 | 48110375 | C | T | SNP | 0 0 | 0 1 | 50 1 | 4 7   |
| Chr10 | 48110453 | 48110453 | C | T | SNP | 0 0 | 0 1 | 61 1 | 6 12  |
| Chr10 | 48110465 | 48110465 | A | G | SNP | 0 0 | 0 1 | 60 1 | 7 16  |
| Chr10 | 48110508 | 48110508 | A | C | SNP | 0 0 | 0 1 | 73 0 | 8 21  |
| Chr10 | 48110687 | 48110687 | C | A | SNP | 0 0 | 0 1 | 73 2 | 10 13 |
| Chr10 | 48113597 | 48113597 | A | G | SNP | 0 0 | 0 1 | 57 0 | 5 16  |
| Chr10 | 48115513 | 48115513 | G | A | SNP | 0 0 | 0 1 | 49 1 | 4 12  |
| Chr10 | 48115559 | 48115559 | A | C | SNP | 0 0 | 0 1 | 56 1 | 3 12  |
| Chr10 | 48115590 | 48115590 | G | A | SNP | 0 0 | 0 1 | 66 2 | 2 16  |
| Chr10 | 48115707 | 48115707 | A | C | SNP | 0 0 | 0 1 | 47 2 | 6 17  |
| Chr10 | 48119600 | 48119600 | T | C | SNP | 0 0 | 0 1 | 66 1 | 2 20  |
| Chr10 | 48119856 | 48119856 | G | T | SNP | 0 0 | 0 1 | 61 2 | 5 8   |
| Chr10 | 48123973 | 48123973 | T | C | SNP | 0 0 | 0 1 | 25 1 | 5 5   |
| Chr10 | 48126201 | 48126201 | C | G | SNP | 0 1 | 0 1 | 23 2 | 1 8   |
| Chr10 | 48126220 | 48126220 | T | C | SNP | 0 0 | 0 1 | 29 2 | 3 10  |
| Chr10 | 48126385 | 48126385 | A | C | SNP | 0 0 | 0 1 | 62 3 | 4 9   |
| Chr10 | 48126525 | 48126525 | G | C | SNP | 0 0 | 0 1 | 51 3 | 5 19  |
| Chr10 | 48126822 | 48126822 | G | A | SNP | 0 0 | 0 1 | 86 4 | 6 16  |
| Chr10 | 48127516 | 48127516 | T | A | SNP | 0 0 | 0 1 | 67 5 | 2 6   |
| Chr10 | 48127550 | 48127550 | G | A | SNP | 0 0 | 0 1 | 63 3 | 6 8   |
| Chr10 | 48127567 | 48127567 | T | G | SNP | 0 0 | 0 1 | 63 3 | 5 8   |
| Chr10 | 48127627 | 48127627 | G | C | SNP | 0 0 | 0 1 | 50 2 | 7 8   |
| Chr10 | 48128304 | 48128304 | G | T | SNP | 0 0 | 0 1 | 43 0 | 5 12  |
| Chr10 | 48128405 | 48128405 | C | T | SNP | 0 0 | 0 1 | 38 0 | 3 13  |



|       |          |          |   |   |     |     |     |       |       |
|-------|----------|----------|---|---|-----|-----|-----|-------|-------|
| Chr10 | 48129479 | 48129479 | C | T | SNP | 0 0 | 0 1 | 69 3  | 5 15  |
| Chr10 | 48131992 | 48131992 | T | C | SNP | 0 0 | 0 1 | 38 1  | 6 7   |
| Chr10 | 48132151 | 48132151 | C | T | SNP | 0 0 | 0 1 | 38 0  | 2 6   |
| Chr10 | 48133164 | 48133164 | T | C | SNP | 0 0 | 0 1 | 71 1  | 8 13  |
| Chr10 | 48133919 | 48133919 | A | G | SNP | 0 0 | 0 1 | 60 3  | 6 3   |
| Chr10 | 48134021 | 48134021 | C | T | SNP | 0 0 | 0 1 | 77 0  | 8 7   |
| Chr10 | 48134178 | 48134178 | C | T | SNP | 0 0 | 0 1 | 89 1  | 25 11 |
| Chr10 | 48134228 | 48134228 | A | T | SNP | 0 1 | 0 1 | 64 28 | 18 14 |
| Chr10 | 48134808 | 48134808 | G | A | SNP | 0 1 | 0 0 | 62 35 | 11 1  |
| Chr10 | 48135020 | 48135020 | C | T | SNP | 0 0 | 0 1 | 62 2  | 4 6   |
| Chr10 | 48135252 | 48135252 | G | A | SNP | 0 0 | 0 1 | 44 1  | 5 8   |
| Chr10 | 48135294 | 48135294 | G | A | SNP | 0 0 | 0 1 | 39 1  | 4 6   |
| Chr10 | 48136336 | 48136336 | G | A | SNP | 0 0 | 0 1 | 46 1  | 16 12 |
| Chr10 | 48136364 | 48136364 | T | C | SNP | 0 0 | 0 1 | 50 0  | 11 6  |
| Chr10 | 48136923 | 48136923 | C | T | SNP | 0 0 | 0 1 | 27 0  | 8 6   |
| Chr10 | 48137323 | 48137323 | G | A | SNP | 0 1 | 1 1 | 33 4  | 2 22  |
| Chr10 | 48137473 | 48137473 | A | G | SNP | 0 0 | 0 1 | 20 0  | 5 23  |
| Chr10 | 48138180 | 48138180 | A | G | SNP | 0 0 | 0 1 | 47 1  | 3 16  |
| Chr10 | 48138444 | 48138444 | T | G | SNP | 0 1 | 0 1 | 55 5  | 9 23  |
| Chr10 | 48138570 | 48138570 | T | C | SNP | 0 1 | 0 1 | 40 3  | 8 28  |
| Chr10 | 48138709 | 48138709 | G | A | SNP | 0 1 | 0 1 | 35 6  | 5 37  |
| Chr10 | 48138795 | 48138795 | G | A | SNP | 0 1 | 0 1 | 41 3  | 5 27  |
| Chr10 | 48138803 | 48138803 | A | G | SNP | 0 0 | 0 1 | 39 2  | 4 27  |
| Chr10 | 48146683 | 48146683 | G | A | SNP | 0 0 | 0 1 | 39 0  | 4 10  |
| Chr10 | 48147580 | 48147580 | C | A | SNP | 0 0 | 0 1 | 26 0  | 7 7   |
| Chr10 | 48147731 | 48147731 | C | A | SNP | 0 0 | 0 1 | 65 5  | 10 9  |
| Chr10 | 48147920 | 48147920 | G | C | SNP | 0 0 | 0 1 | 77 4  | 7 15  |
| Chr10 | 48148431 | 48148431 | A | G | SNP | 0 0 | 0 1 | 65 2  | 5 24  |
| Chr10 | 48148722 | 48148722 | T | G | SNP | 0 0 | 0 1 | 37 1  | 5 14  |
| Chr10 | 48148996 | 48148996 | A | G | SNP | 0 0 | 0 1 | 34 0  | 6 3   |
| Chr10 | 48149220 | 48149220 | T | C | SNP | 0 0 | 0 1 | 29 0  | 4 5   |
| Chr10 | 48149975 | 48149975 | G | C | SNP | 0 0 | 0 1 | 69 2  | 6 16  |
| Chr10 | 48152623 | 48152623 | G | C | SNP | 0 0 | 0 1 | 61 3  | 8 18  |
| Chr10 | 48152641 | 48152641 | T | A | SNP | 0 0 | 0 1 | 56 4  | 10 15 |
| Chr10 | 48153052 | 48153052 | C | G | SNP | 0 0 | 0 1 | 43 1  | 2 7   |
| Chr10 | 48153069 | 48153069 | G | A | SNP | 0 0 | 0 1 | 44 2  | 2 9   |
| Chr10 | 48153993 | 48153993 | C | G | SNP | 0 0 | 0 1 | 21 0  | 1 7   |
| Chr10 | 48155030 | 48155030 | T | G | SNP | 0 0 | 0 1 | 55 0  | 9 10  |
| Chr10 | 48155338 | 48155338 | A | G | SNP | 0 1 | 0 1 | 47 5  | 9 13  |
| Chr10 | 48155413 | 48155413 | G | A | SNP | 0 1 | 0 1 | 40 3  | 5 15  |
| Chr10 | 48156314 | 48156314 | T | A | SNP | 0 0 | 0 1 | 36 1  | 6 10  |
| Chr10 | 48156517 | 48156517 | G | T | SNP | 0 0 | 0 1 | 37 0  | 4 16  |

|       |          |          |   |   |     |     |     |      |       |
|-------|----------|----------|---|---|-----|-----|-----|------|-------|
| Chr10 | 48156707 | 48156707 | T | C | SNP | 0 1 | 0 1 | 36 3 | 4 6   |
| Chr10 | 48156850 | 48156850 | G | C | SNP | 0 1 | 0 1 | 26 2 | 3 13  |
| Chr10 | 48156894 | 48156894 | G | A | SNP | 0 0 | 0 1 | 31 1 | 1 16  |
| Chr10 | 48157208 | 48157208 | A | T | SNP | 0 0 | 0 1 | 48 3 | 7 15  |
| Chr10 | 48157302 | 48157302 | A | G | SNP | 0 1 | 0 1 | 53 4 | 4 12  |
| Chr10 | 48157349 | 48157349 | A | T | SNP | 0 1 | 0 1 | 54 6 | 5 12  |
| Chr10 | 48157364 | 48157364 | C | A | SNP | 0 1 | 0 1 | 56 5 | 4 13  |
| Chr10 | 48157418 | 48157418 | C | G | SNP | 0 1 | 0 1 | 53 5 | 3 11  |
| Chr10 | 48157510 | 48157510 | A | G | SNP | 0 0 | 0 1 | 71 5 | 3 11  |
| Chr10 | 48157589 | 48157589 | T | A | SNP | 0 1 | 0 1 | 60 5 | 2 7   |
| Chr10 | 48157632 | 48157632 | T | C | SNP | 0 0 | 0 1 | 53 3 | 4 6   |
| Chr10 | 48157665 | 48157665 | G | A | SNP | 0 0 | 0 1 | 57 2 | 5 6   |
| Chr10 | 48157746 | 48157746 | G | A | SNP | 0 0 | 0 1 | 56 2 | 4 4   |
| Chr10 | 48158372 | 48158372 | A | C | SNP | 0 0 | 0 1 | 75 5 | 9 17  |
| Chr10 | 48158376 | 48158376 | G | C | SNP | 0 0 | 0 1 | 82 5 | 9 17  |
| Chr10 | 48158621 | 48158621 | T | G | SNP | 0 0 | 0 1 | 69 3 | 10 25 |
| Chr10 | 48158673 | 48158673 | C | A | SNP | 0 0 | 0 1 | 57 3 | 11 23 |
| Chr10 | 48158691 | 48158691 | C | T | SNP | 0 0 | 0 1 | 66 3 | 10 21 |
| Chr10 | 48158716 | 48158716 | T | A | SNP | 0 0 | 0 1 | 61 4 | 9 18  |
| Chr10 | 48158794 | 48158794 | G | T | SNP | 0 0 | 0 1 | 47 2 | 5 7   |
| Chr10 | 48158804 | 48158804 | C | G | SNP | 0 0 | 0 1 | 43 2 | 4 6   |
| Chr10 | 48158858 | 48158858 | A | G | SNP | 0 1 | 0 1 | 35 3 | 6 10  |
| Chr10 | 48158866 | 48158866 | C | T | SNP | 0 1 | 0 1 | 31 3 | 5 10  |
| Chr10 | 48159438 | 48159438 | G | A | SNP | 0 0 | 0 1 | 48 2 | 4 10  |
| Chr10 | 48159592 | 48159592 | G | A | SNP | 0 0 | 0 1 | 43 0 | 7 20  |
| Chr10 | 48159616 | 48159616 | G | A | SNP | 0 0 | 0 1 | 45 0 | 7 15  |
| Chr10 | 48159632 | 48159632 | A | G | SNP | 0 0 | 0 1 | 49 0 | 9 13  |
| Chr10 | 48159893 | 48159893 | T | G | SNP | 0 0 | 0 1 | 48 2 | 8 9   |
| Chr10 | 48159970 | 48159970 | C | A | SNP | 0 0 | 0 1 | 61 2 | 4 7   |
| Chr10 | 48159989 | 48159989 | G | T | SNP | 0 0 | 0 1 | 56 2 | 6 7   |
| Chr10 | 48160265 | 48160265 | T | A | SNP | 0 1 | 0 1 | 44 7 | 5 9   |
| Chr10 | 48160408 | 48160408 | G | A | SNP | 0 0 | 0 1 | 56 2 | 6 20  |
| Chr10 | 48160684 | 48160684 | A | G | SNP | 0 0 | 0 1 | 60 2 | 7 19  |
| Chr10 | 48160911 | 48160911 | A | T | SNP | 0 0 | 0 1 | 52 1 | 2 7   |
| Chr10 | 48160930 | 48160930 | A | G | SNP | 0 0 | 0 1 | 57 1 | 2 9   |
| Chr10 | 48161072 | 48161072 | C | T | SNP | 0 0 | 0 1 | 51 3 | 5 12  |
| Chr10 | 48161195 | 48161195 | T | C | SNP | 0 0 | 0 1 | 39 1 | 3 7   |
| Chr10 | 48161674 | 48161674 | A | C | SNP | 0 0 | 0 1 | 37 1 | 6 11  |
| Chr10 | 48161733 | 48161733 | G | A | SNP | 0 0 | 0 1 | 37 2 | 6 9   |
| Chr10 | 48161951 | 48161951 | C | T | SNP | 0 0 | 0 1 | 24 0 | 2 7   |
| Chr10 | 48161985 | 48161985 | A | T | SNP | 0 0 | 0 1 | 27 0 | 2 8   |
| Chr10 | 48161992 | 48161992 | T | A | SNP | 0 0 | 0 1 | 28 0 | 1 8   |

|       |          |          |   |   |     |     |     |      |       |
|-------|----------|----------|---|---|-----|-----|-----|------|-------|
| Chr10 | 48162189 | 48162189 | G | A | SNP | 0 0 | 0 1 | 53 1 | 8 14  |
| Chr10 | 48162833 | 48162833 | A | G | SNP | 0 0 | 0 1 | 67 1 | 3 10  |
| Chr10 | 48163058 | 48163058 | G | A | SNP | 0 0 | 0 1 | 33 1 | 1 9   |
| Chr10 | 48166465 | 48166465 | A | G | SNP | 0 0 | 0 1 | 51 0 | 3 12  |
| Chr10 | 48166502 | 48166502 | T | G | SNP | 0 0 | 0 1 | 57 1 | 3 10  |
| Chr10 | 48166727 | 48166727 | G | A | SNP | 0 0 | 0 1 | 51 2 | 3 18  |
| Chr10 | 48167045 | 48167045 | T | C | SNP | 0 0 | 0 1 | 49 5 | 3 17  |
| Chr10 | 48167228 | 48167228 | C | A | SNP | 0 0 | 0 1 | 22 0 | 3 8   |
| Chr10 | 48169865 | 48169865 | T | C | SNP | 0 0 | 0 1 | 14 0 | 5 5   |
| Chr10 | 48169866 | 48169866 | T | C | SNP | 0 0 | 0 1 | 14 0 | 5 5   |
| Chr10 | 48169867 | 48169867 | T | A | SNP | 0 0 | 0 1 | 14 0 | 5 5   |
| Chr10 | 48169926 | 48169926 | T | C | SNP | 0 0 | 0 1 | 21 0 | 3 7   |
| Chr10 | 48170570 | 48170570 | G | A | SNP | 0 0 | 0 1 | 80 1 | 6 32  |
| Chr10 | 48170798 | 48170798 | G | C | SNP | 0 0 | 0 1 | 89 2 | 11 18 |
| Chr10 | 48170966 | 48170966 | G | A | SNP | 0 0 | 0 1 | 45 0 | 1 8   |
| Chr10 | 48174348 | 48174348 | G | A | SNP | 0 0 | 0 1 | 59 0 | 9 7   |
| Chr10 | 48174986 | 48174986 | G | A | SNP | 0 0 | 1 1 | 34 0 | 0 11  |
| Chr10 | 48175102 | 48175102 | G | A | SNP | 0 0 | 0 1 | 32 1 | 2 6   |
| Chr10 | 48176022 | 48176022 | G | C | SNP | 0 0 | 0 1 | 17 0 | 2 9   |
| Chr10 | 48176609 | 48176609 | A | G | SNP | 0 0 | 0 1 | 19 0 | 5 8   |
| Chr10 | 48176655 | 48176655 | A | C | SNP | 0 0 | 0 1 | 25 0 | 3 6   |
| Chr10 | 48176829 | 48176829 | T | C | SNP | 0 0 | 0 1 | 24 2 | 4 9   |
| Chr10 | 48176835 | 48176835 | C | A | SNP | 0 0 | 0 1 | 28 2 | 4 9   |
| Chr10 | 48176862 | 48176862 | T | C | SNP | 0 0 | 0 1 | 29 2 | 5 7   |
| Chr10 | 48176870 | 48176870 | G | A | SNP | 0 0 | 0 1 | 28 2 | 5 7   |
| Chr10 | 48176880 | 48176880 | T | C | SNP | 0 1 | 0 1 | 32 2 | 6 6   |
| Chr10 | 48176896 | 48176896 | T | C | SNP | 0 1 | 0 1 | 32 4 | 2 6   |
| Chr10 | 48176901 | 48176901 | T | C | SNP | 0 1 | 0 1 | 32 4 | 3 6   |
| Chr10 | 48176905 | 48176905 | T | A | SNP | 0 1 | 0 1 | 31 4 | 3 6   |
| Chr10 | 48176969 | 48176969 | T | C | SNP | 0 1 | 0 1 | 17 2 | 4 5   |
| Chr10 | 48177305 | 48177305 | T | C | SNP | 0 0 | 0 1 | 22 0 | 3 6   |
| Chr10 | 48177338 | 48177338 | C | T | SNP | 0 0 | 0 1 | 16 0 | 3 6   |
| Chr10 | 48177421 | 48177421 | A | G | SNP | 0 0 | 0 1 | 20 0 | 6 5   |
| Chr10 | 48177440 | 48177440 | T | C | SNP | 0 0 | 0 1 | 19 0 | 6 5   |
| Chr10 | 48179081 | 48179081 | T | G | SNP | 0 0 | 0 1 | 17 0 | 7 7   |
| Chr10 | 48179090 | 48179090 | A | T | SNP | 0 0 | 0 1 | 18 0 | 7 7   |
| Chr10 | 48179139 | 48179139 | T | G | SNP | 0 0 | 0 1 | 11 0 | 5 8   |
| Chr10 | 48180457 | 48180457 | A | G | SNP | 0 0 | 0 1 | 42 1 | 7 16  |
| Chr10 | 48180559 | 48180559 | A | G | SNP | 0 0 | 0 1 | 36 1 | 8 10  |
| Chr10 | 48180581 | 48180581 | T | G | SNP | 0 0 | 0 1 | 37 1 | 9 12  |
| Chr10 | 48180586 | 48180586 | A | G | SNP | 0 0 | 0 1 | 39 1 | 9 12  |
| Chr10 | 48180591 | 48180591 | A | T | SNP | 0 0 | 0 1 | 41 1 | 9 11  |

|       |          |          |   |   |     |     |     |      |      |
|-------|----------|----------|---|---|-----|-----|-----|------|------|
| Chr10 | 48180671 | 48180671 | A | C | SNP | 0 0 | 0 1 | 61 1 | 9 10 |
| Chr10 | 48180770 | 48180770 | A | C | SNP | 0 0 | 0 1 | 51 0 | 8 14 |
| Chr10 | 48180812 | 48180812 | C | A | SNP | 0 0 | 0 1 | 56 1 | 7 17 |
| Chr10 | 48180844 | 48180844 | C | T | SNP | 0 0 | 0 1 | 60 2 | 4 13 |
| Chr10 | 48180853 | 48180853 | G | A | SNP | 0 0 | 0 1 | 57 2 | 4 10 |
| Chr10 | 48180861 | 48180861 | A | G | SNP | 0 0 | 0 1 | 59 2 | 5 11 |
| Chr10 | 48180877 | 48180877 | T | G | SNP | 0 0 | 0 1 | 60 3 | 5 13 |
| Chr10 | 48181171 | 48181171 | G | T | SNP | 0 1 | 0 1 | 65 5 | 3 14 |
| Chr10 | 48181317 | 48181317 | T | C | SNP | 0 0 | 0 1 | 72 4 | 1 14 |
| Chr10 | 48185607 | 48185607 | C | G | SNP | 0 0 | 0 1 | 21 0 | 1 19 |
| Chr10 | 48186896 | 48186896 | A | T | SNP | 0 0 | 0 1 | 34 2 | 4 11 |
| Chr10 | 48187146 | 48187146 | T | C | SNP | 0 0 | 0 1 | 19 0 | 4 4  |
| Chr10 | 48187341 | 48187341 | A | G | SNP | 0 0 | 0 1 | 56 3 | 3 16 |
| Chr10 | 48187463 | 48187463 | T | C | SNP | 0 0 | 0 1 | 49 0 | 4 4  |
| Chr10 | 48187564 | 48187564 | A | C | SNP | 0 0 | 0 1 | 42 0 | 3 8  |
| Chr10 | 48187648 | 48187648 | G | T | SNP | 0 0 | 0 1 | 48 1 | 5 8  |
| Chr10 | 48187654 | 48187654 | A | C | SNP | 0 0 | 0 1 | 46 1 | 5 9  |
| Chr10 | 48189259 | 48189259 | A | C | SNP | 0 0 | 0 1 | 63 1 | 11 7 |
| Chr10 | 48189270 | 48189270 | G | C | SNP | 0 0 | 0 1 | 59 1 | 11 7 |
| Chr10 | 48189444 | 48189444 | C | G | SNP | 0 0 | 0 1 | 39 0 | 8 14 |
| Chr10 | 48189525 | 48189525 | C | T | SNP | 0 0 | 0 1 | 43 0 | 7 14 |
| Chr10 | 48189638 | 48189638 | C | A | SNP | 0 0 | 0 1 | 31 1 | 9 8  |
| Chr10 | 48189648 | 48189648 | C | A | SNP | 0 0 | 0 1 | 28 1 | 9 8  |
| Chr10 | 48189759 | 48189759 | A | T | SNP | 0 0 | 0 1 | 22 1 | 6 8  |
| Chr10 | 48189840 | 48189840 | A | T | SNP | 0 0 | 0 1 | 30 0 | 3 12 |
| Chr10 | 48189841 | 48189841 | A | C | SNP | 0 0 | 0 1 | 29 0 | 3 12 |
| Chr10 | 48189843 | 48189843 | C | T | SNP | 0 0 | 0 1 | 29 0 | 3 12 |
| Chr10 | 48189896 | 48189896 | G | T | SNP | 0 0 | 1 1 | 39 1 | 0 13 |
| Chr10 | 48190027 | 48190027 | T | C | SNP | 0 0 | 0 1 | 31 2 | 10 6 |
| Chr10 | 48190247 | 48190247 | A | G | SNP | 0 0 | 0 1 | 29 2 | 5 13 |
| Chr10 | 48190264 | 48190264 | T | G | SNP | 0 0 | 0 1 | 35 1 | 4 13 |
| Chr10 | 48190300 | 48190300 | G | A | SNP | 0 0 | 0 1 | 36 1 | 5 8  |
| Chr10 | 48190406 | 48190406 | A | G | SNP | 0 0 | 0 1 | 34 2 | 2 10 |
| Chr10 | 48190594 | 48190594 | T | C | SNP | 0 0 | 0 1 | 48 3 | 1 14 |
| Chr10 | 48190626 | 48190626 | G | T | SNP | 0 0 | 0 1 | 45 3 | 2 14 |
| Chr10 | 48190689 | 48190689 | G | A | SNP | 0 1 | 0 1 | 35 3 | 7 13 |
| Chr10 | 48192432 | 48192432 | C | G | SNP | 0 0 | 0 1 | 65 4 | 3 13 |
| Chr10 | 48196522 | 48196522 | C | T | SNP | 0 0 | 0 1 | 35 1 | 1 9  |
| Chr10 | 48196769 | 48196769 | T | A | SNP | 0 0 | 0 1 | 50 3 | 1 12 |
| Chr10 | 48197057 | 48197057 | A | G | SNP | 0 0 | 0 1 | 61 2 | 4 22 |
| Chr10 | 48197290 | 48197290 | G | T | SNP | 0 0 | 0 1 | 58 6 | 9 13 |
| Chr10 | 48200490 | 48200490 | A | T | SNP | 0 0 | 0 1 | 15 0 | 1 7  |

|       |          |          |   |   |     |     |     |      |      |
|-------|----------|----------|---|---|-----|-----|-----|------|------|
| Chr10 | 48200516 | 48200516 | T | C | SNP | 0 0 | 0 1 | 14 0 | 2 6  |
| Chr10 | 48200898 | 48200898 | A | G | SNP | 0 0 | 0 1 | 29 1 | 1 8  |
| Chr10 | 48201278 | 48201278 | G | C | SNP | 0 0 | 0 1 | 50 0 | 4 10 |
| Chr10 | 48201407 | 48201407 | A | C | SNP | 0 0 | 0 1 | 51 1 | 3 20 |
| Chr10 | 48201741 | 48201741 | C | G | SNP | 0 0 | 0 1 | 44 0 | 3 15 |
| Chr10 | 48202732 | 48202732 | G | C | SNP | 0 0 | 0 1 | 57 1 | 5 16 |
| Chr10 | 48202738 | 48202738 | C | A | SNP | 0 0 | 0 1 | 58 1 | 5 16 |
| Chr10 | 48202955 | 48202955 | G | A | SNP | 0 0 | 0 1 | 47 0 | 3 12 |
| Chr10 | 48202994 | 48202994 | A | G | SNP | 0 0 | 0 1 | 44 0 | 8 7  |
| Chr10 | 48203039 | 48203039 | T | A | SNP | 0 0 | 0 1 | 56 0 | 9 7  |
| Chr10 | 48203628 | 48203628 | C | T | SNP | 0 0 | 0 1 | 43 0 | 2 14 |
| Chr10 | 48203659 | 48203659 | T | C | SNP | 0 0 | 0 1 | 43 1 | 2 14 |
| Chr10 | 48203684 | 48203684 | C | T | SNP | 0 0 | 0 1 | 40 1 | 5 12 |
| Chr10 | 48204187 | 48204187 | G | A | SNP | 0 0 | 0 1 | 54 4 | 1 9  |
| Chr10 | 48204229 | 48204229 | G | A | SNP | 0 0 | 0 1 | 56 3 | 1 14 |
| Chr10 | 48204250 | 48204250 | A | T | SNP | 0 0 | 0 1 | 56 2 | 1 14 |
| Chr10 | 48204252 | 48204252 | A | G | SNP | 0 0 | 0 1 | 54 1 | 1 13 |
| Chr10 | 48204295 | 48204295 | G | A | SNP | 0 0 | 0 1 | 49 2 | 3 11 |
| Chr10 | 48204658 | 48204658 | T | A | SNP | 0 1 | 0 1 | 36 5 | 8 10 |
| Chr10 | 48204717 | 48204717 | A | C | SNP | 0 0 | 0 1 | 41 3 | 7 5  |
| Chr10 | 48204786 | 48204786 | C | G | SNP | 0 0 | 0 1 | 54 3 | 6 4  |
| Chr10 | 48204799 | 48204799 | T | C | SNP | 0 0 | 0 1 | 55 2 | 6 3  |
| Chr10 | 48204933 | 48204933 | G | A | SNP | 0 0 | 0 1 | 25 0 | 6 4  |
| Chr10 | 48205224 | 48205224 | C | G | SNP | 0 0 | 0 1 | 20 0 | 4 6  |
| Chr10 | 48205441 | 48205441 | G | A | SNP | 0 0 | 0 1 | 28 1 | 4 12 |
| Chr10 | 48206041 | 48206041 | C | T | SNP | 0 0 | 0 1 | 38 1 | 6 5  |
| Chr10 | 48206200 | 48206200 | C | T | SNP | 0 0 | 0 1 | 46 0 | 1 9  |
| Chr10 | 48206202 | 48206202 | G | C | SNP | 0 0 | 0 1 | 45 0 | 1 9  |
| Chr10 | 48206659 | 48206659 | A | G | SNP | 0 0 | 0 1 | 22 0 | 5 10 |
| Chr10 | 48206660 | 48206660 | C | T | SNP | 0 0 | 0 1 | 24 0 | 5 10 |
| Chr10 | 48206707 | 48206707 | G | C | SNP | 0 0 | 0 1 | 16 0 | 5 8  |
| Chr10 | 48206735 | 48206735 | G | C | SNP | 0 0 | 0 1 | 14 0 | 6 6  |
| Chr10 | 48206747 | 48206747 | G | T | SNP | 0 0 | 0 1 | 14 0 | 6 4  |
| Chr10 | 48206748 | 48206748 | T | G | SNP | 0 0 | 0 1 | 13 0 | 6 4  |
| Chr10 | 48208974 | 48208974 | C | T | SNP | 0 0 | 0 1 | 37 0 | 7 7  |
| Chr10 | 48209094 | 48209094 | G | A | SNP | 0 0 | 0 1 | 32 1 | 6 6  |
| Chr10 | 48211656 | 48211656 | A | G | SNP | 0 0 | 1 1 | 27 1 | 0 8  |
| Chr10 | 48212299 | 48212299 | T | C | SNP | 0 0 | 0 1 | 41 1 | 4 15 |
| Chr10 | 48213028 | 48213028 | C | G | SNP | 0 0 | 0 1 | 52 2 | 7 14 |
| Chr10 | 48213046 | 48213046 | T | C | SNP | 0 0 | 0 1 | 49 2 | 8 14 |
| Chr10 | 48213272 | 48213272 | T | G | SNP | 0 0 | 0 1 | 44 2 | 7 16 |
| Chr10 | 48213286 | 48213286 | T | C | SNP | 0 0 | 0 1 | 46 2 | 7 16 |

|       |          |          |   |   |     |     |     |      |       |
|-------|----------|----------|---|---|-----|-----|-----|------|-------|
| Chr10 | 48213290 | 48213290 | A | G | SNP | 0 0 | 0 1 | 46 2 | 7 16  |
| Chr10 | 48213295 | 48213295 | C | T | SNP | 0 0 | 0 1 | 45 2 | 8 17  |
| Chr10 | 48213304 | 48213304 | A | G | SNP | 0 0 | 0 1 | 45 2 | 7 17  |
| Chr10 | 48213335 | 48213335 | A | G | SNP | 0 0 | 0 1 | 43 3 | 11 16 |
| Chr10 | 48213344 | 48213344 | A | G | SNP | 0 0 | 0 1 | 47 3 | 11 17 |
| Chr10 | 48213377 | 48213377 | T | C | SNP | 0 1 | 0 1 | 51 5 | 8 13  |
| Chr10 | 48213395 | 48213395 | T | A | SNP | 0 1 | 0 1 | 51 4 | 12 8  |
| Chr10 | 48213619 | 48213619 | C | T | SNP | 0 0 | 0 1 | 61 4 | 5 21  |
| Chr10 | 48213624 | 48213624 | A | G | SNP | 0 0 | 0 1 | 62 4 | 5 22  |
| Chr10 | 48213898 | 48213898 | A | G | SNP | 0 0 | 0 1 | 49 2 | 6 12  |
| Chr10 | 48213938 | 48213938 | C | T | SNP | 0 0 | 0 1 | 44 1 | 5 9   |
| Chr10 | 48214054 | 48214054 | T | A | SNP | 0 0 | 0 1 | 45 1 | 8 11  |
| Chr10 | 48214586 | 48214586 | T | C | SNP | 0 0 | 0 1 | 32 2 | 5 17  |
| Chr10 | 48214607 | 48214607 | A | G | SNP | 0 0 | 0 1 | 30 1 | 5 13  |
| Chr10 | 48214611 | 48214611 | C | T | SNP | 0 0 | 0 1 | 30 1 | 5 10  |
| Chr10 | 48215185 | 48215185 | A | T | SNP | 0 0 | 0 1 | 62 1 | 6 11  |
| Chr10 | 48215707 | 48215707 | G | A | SNP | 0 0 | 0 1 | 79 1 | 5 17  |
| Chr10 | 48216342 | 48216342 | A | G | SNP | 0 0 | 0 1 | 48 0 | 3 15  |
| Chr10 | 48216362 | 48216362 | G | A | SNP | 0 0 | 0 1 | 41 0 | 5 18  |
| Chr10 | 48216572 | 48216572 | C | A | SNP | 0 0 | 0 1 | 39 0 | 3 15  |
| Chr10 | 48216629 | 48216629 | T | A | SNP | 0 0 | 0 1 | 36 0 | 5 14  |
| Chr10 | 48216654 | 48216654 | G | C | SNP | 0 0 | 0 1 | 34 0 | 5 14  |
| Chr10 | 48217620 | 48217620 | C | T | SNP | 0 0 | 0 1 | 30 1 | 3 14  |
| Chr10 | 48218131 | 48218131 | A | G | SNP | 0 1 | 0 1 | 45 8 | 3 10  |
| Chr10 | 48218303 | 48218303 | G | C | SNP | 0 1 | 0 1 | 54 5 | 2 9   |
| Chr10 | 48218414 | 48218414 | T | C | SNP | 0 0 | 0 1 | 66 4 | 5 24  |
| Chr10 | 48218474 | 48218474 | G | A | SNP | 0 0 | 0 1 | 55 2 | 5 21  |
| Chr10 | 48218759 | 48218759 | C | T | SNP | 0 0 | 0 1 | 60 0 | 9 13  |
| Chr10 | 48218821 | 48218821 | C | T | SNP | 0 0 | 0 1 | 47 0 | 9 12  |
| Chr10 | 48218847 | 48218847 | T | C | SNP | 0 0 | 0 1 | 49 0 | 8 13  |
| Chr10 | 48218894 | 48218894 | A | G | SNP | 0 0 | 0 1 | 43 1 | 7 17  |
| Chr10 | 48218897 | 48218897 | G | A | SNP | 0 0 | 0 1 | 41 1 | 7 18  |
| Chr10 | 48219104 | 48219104 | G | T | SNP | 0 0 | 0 1 | 50 0 | 9 6   |
| Chr10 | 48219309 | 48219309 | A | T | SNP | 0 0 | 0 1 | 61 4 | 4 6   |
| Chr10 | 48219684 | 48219684 | T | C | SNP | 0 0 | 0 1 | 54 2 | 7 8   |
| Chr10 | 48219849 | 48219849 | G | A | SNP | 0 0 | 0 1 | 35 0 | 7 6   |
| Chr10 | 48220061 | 48220061 | A | G | SNP | 0 1 | 0 1 | 44 5 | 4 7   |
| Chr10 | 48220117 | 48220117 | C | A | SNP | 0 0 | 0 1 | 48 4 | 6 7   |
| Chr10 | 48220797 | 48220797 | A | C | SNP | 0 0 | 0 1 | 31 0 | 3 14  |
| Chr10 | 48220870 | 48220870 | T | A | SNP | 0 0 | 0 1 | 26 0 | 3 13  |
| Chr10 | 48222094 | 48222094 | C | A | SNP | 0 0 | 0 1 | 47 0 | 5 23  |
| Chr10 | 48222745 | 48222745 | C | T | SNP | 0 1 | 0 1 | 25 4 | 3 9   |

|       |          |          |   |   |     |     |     |      |       |
|-------|----------|----------|---|---|-----|-----|-----|------|-------|
| Chr10 | 48222952 | 48222952 | T | A | SNP | 0 1 | 0 1 | 26 2 | 4 8   |
| Chr10 | 48223222 | 48223222 | C | G | SNP | 0 0 | 0 1 | 50 1 | 5 8   |
| Chr10 | 48223298 | 48223298 | T | A | SNP | 0 0 | 0 1 | 43 3 | 1 9   |
| Chr10 | 48223320 | 48223320 | T | A | SNP | 0 1 | 0 1 | 39 2 | 1 8   |
| Chr10 | 48224261 | 48224261 | G | A | SNP | 0 0 | 0 1 | 18 0 | 1 9   |
| Chr10 | 48224265 | 48224265 | C | T | SNP | 0 0 | 0 1 | 16 0 | 1 9   |
| Chr10 | 48224552 | 48224552 | A | G | SNP | 0 0 | 0 1 | 33 1 | 2 10  |
| Chr10 | 48224770 | 48224770 | G | A | SNP | 0 0 | 0 1 | 22 0 | 2 9   |
| Chr10 | 48224776 | 48224776 | T | G | SNP | 0 0 | 0 1 | 21 1 | 1 10  |
| Chr10 | 48224797 | 48224797 | T | C | SNP | 0 0 | 0 1 | 19 1 | 1 7   |
| Chr10 | 48236216 | 48236216 | T | A | SNP | 0 0 | 0 1 | 47 0 | 3 10  |
| Chr10 | 48237848 | 48237848 | T | C | SNP | 0 0 | 0 1 | 42 1 | 6 5   |
| Chr10 | 48238429 | 48238429 | T | C | SNP | 0 0 | 0 1 | 74 4 | 5 22  |
| Chr10 | 48239250 | 48239250 | C | T | SNP | 0 0 | 0 1 | 53 2 | 7 11  |
| Chr10 | 48239291 | 48239291 | A | G | SNP | 0 0 | 0 1 | 46 3 | 4 13  |
| Chr10 | 48239628 | 48239628 | T | C | SNP | 0 1 | 0 1 | 29 7 | 6 9   |
| Chr10 | 48239629 | 48239629 | T | A | SNP | 0 1 | 0 1 | 29 7 | 6 9   |
| Chr10 | 48239658 | 48239658 | T | G | SNP | 0 1 | 0 1 | 30 7 | 4 9   |
| Chr10 | 48239838 | 48239838 | T | A | SNP | 0 0 | 0 1 | 43 4 | 8 9   |
| Chr10 | 48239896 | 48239896 | G | A | SNP | 0 1 | 0 1 | 44 5 | 4 9   |
| Chr10 | 48239937 | 48239937 | C | T | SNP | 0 0 | 0 1 | 52 3 | 2 9   |
| Chr10 | 48239947 | 48239947 | A | C | SNP | 0 0 | 0 1 | 48 2 | 2 7   |
| Chr10 | 48240084 | 48240084 | G | C | SNP | 0 0 | 0 1 | 45 1 | 4 7   |
| Chr10 | 48240277 | 48240277 | C | T | SNP | 0 0 | 0 1 | 44 1 | 4 5   |
| Chr10 | 48240320 | 48240320 | C | G | SNP | 0 0 | 0 1 | 66 1 | 4 5   |
| Chr10 | 48240615 | 48240615 | A | T | SNP | 0 0 | 0 1 | 25 1 | 5 4   |
| Chr10 | 48240892 | 48240892 | A | C | SNP | 0 0 | 0 1 | 17 0 | 1 10  |
| Chr10 | 48242467 | 48242467 | T | G | SNP | 0 0 | 0 1 | 49 3 | 3 21  |
| Chr10 | 48242896 | 48242896 | A | G | SNP | 0 0 | 0 1 | 55 1 | 5 12  |
| Chr10 | 48243814 | 48243814 | T | G | SNP | 0 0 | 0 1 | 35 0 | 3 12  |
| Chr10 | 48243826 | 48243826 | A | G | SNP | 0 0 | 0 1 | 39 0 | 3 11  |
| Chr10 | 48246096 | 48246096 | C | T | SNP | 0 0 | 0 1 | 18 1 | 2 12  |
| Chr10 | 48246792 | 48246792 | A | T | SNP | 0 0 | 0 1 | 47 3 | 3 9   |
| Chr10 | 48246825 | 48246825 | G | A | SNP | 0 1 | 0 1 | 41 4 | 3 9   |
| Chr10 | 48246948 | 48246948 | A | G | SNP | 0 1 | 0 1 | 38 4 | 2 9   |
| Chr10 | 48247077 | 48247077 | A | G | SNP | 0 1 | 1 1 | 34 3 | 0 16  |
| Chr10 | 48247094 | 48247094 | T | A | SNP | 0 1 | 1 1 | 36 3 | 0 15  |
| Chr10 | 48247120 | 48247120 | A | G | SNP | 0 1 | 1 1 | 29 3 | 0 14  |
| Chr10 | 48247150 | 48247150 | T | C | SNP | 0 1 | 1 1 | 25 3 | 0 10  |
| Chr10 | 48247173 | 48247173 | T | C | SNP | 0 1 | 0 1 | 28 3 | 1 9   |
| Chr10 | 48252164 | 48252164 | T | C | SNP | 0 0 | 0 1 | 58 2 | 7 14  |
| Chr10 | 48252795 | 48252795 | C | T | SNP | 0 0 | 0 1 | 40 0 | 11 19 |

|       |          |          |   |   |     |     |     |      |       |
|-------|----------|----------|---|---|-----|-----|-----|------|-------|
| Chr10 | 48253038 | 48253038 | T | G | SNP | 0 0 | 0 1 | 30 2 | 7 12  |
| Chr10 | 48253103 | 48253103 | G | T | SNP | 0 0 | 0 1 | 34 1 | 3 14  |
| Chr10 | 48253198 | 48253198 | C | T | SNP | 0 0 | 0 1 | 48 1 | 3 6   |
| Chr10 | 48255955 | 48255955 | T | C | SNP | 0 0 | 0 1 | 28 0 | 4 10  |
| Chr10 | 48256879 | 48256879 | T | C | SNP | 0 0 | 0 1 | 57 3 | 9 10  |
| Chr10 | 48257606 | 48257606 | G | T | SNP | 0 0 | 0 1 | 52 3 | 5 17  |
| Chr10 | 48260027 | 48260027 | A | C | SNP | 0 0 | 0 1 | 64 3 | 6 21  |
| Chr10 | 48263691 | 48263691 | C | T | SNP | 0 1 | 0 1 | 12 1 | 3 9   |
| Chr10 | 48263737 | 48263737 | G | A | SNP | 0 1 | 0 1 | 8 1  | 2 8   |
| Chr10 | 48264381 | 48264381 | T | A | SNP | 0 0 | 0 1 | 56 0 | 5 16  |
| Chr10 | 48264636 | 48264636 | A | G | SNP | 0 0 | 0 1 | 56 1 | 3 20  |
| Chr10 | 48264930 | 48264930 | G | A | SNP | 0 0 | 0 1 | 41 0 | 6 18  |
| Chr10 | 48266020 | 48266020 | G | A | SNP | 0 0 | 0 1 | 70 1 | 5 10  |
| Chr10 | 48266382 | 48266382 | A | T | SNP | 0 0 | 0 1 | 70 3 | 11 18 |
| Chr10 | 48269828 | 48269828 | A | T | SNP | 0 0 | 0 1 | 38 1 | 8 20  |
| Chr10 | 48275463 | 48275463 | A | C | SNP | 0 1 | 0 1 | 24 3 | 6 12  |
| Chr10 | 48276647 | 48276647 | C | A | SNP | 0 0 | 0 1 | 37 1 | 7 11  |
| Chr10 | 48277081 | 48277081 | A | G | SNP | 0 1 | 0 1 | 26 2 | 5 6   |
| Chr10 | 48277441 | 48277441 | C | A | SNP | 0 0 | 0 1 | 25 0 | 1 7   |
| Chr10 | 48277538 | 48277538 | A | G | SNP | 0 0 | 0 1 | 42 0 | 8 8   |
| Chr10 | 48277643 | 48277643 | G | A | SNP | 0 0 | 0 1 | 34 0 | 9 14  |
| Chr10 | 48279063 | 48279063 | T | G | SNP | 0 0 | 0 1 | 33 1 | 2 8   |
| Chr10 | 48279379 | 48279379 | C | T | SNP | 0 1 | 0 1 | 46 4 | 5 10  |
| Chr10 | 48279394 | 48279394 | A | T | SNP | 0 0 | 0 1 | 43 2 | 4 10  |
| Chr10 | 48281020 | 48281020 | A | C | SNP | 0 0 | 0 1 | 47 0 | 7 13  |
| Chr10 | 48281279 | 48281279 | T | G | SNP | 0 0 | 0 1 | 54 1 | 6 15  |
| Chr10 | 48281521 | 48281521 | A | T | SNP | 0 0 | 0 1 | 50 2 | 4 16  |
| Chr10 | 48284965 | 48284965 | C | T | SNP | 0 0 | 0 1 | 56 1 | 7 18  |
| Chr10 | 48285710 | 48285710 | A | G | SNP | 0 0 | 0 1 | 57 1 | 4 10  |
| Chr10 | 48285828 | 48285828 | G | A | SNP | 0 0 | 0 1 | 49 1 | 7 9   |
| Chr10 | 48285951 | 48285951 | T | C | SNP | 0 0 | 0 1 | 65 2 | 5 12  |
| Chr10 | 48288496 | 48288496 | G | A | SNP | 0 0 | 0 1 | 36 0 | 4 8   |
| Chr10 | 48289055 | 48289055 | A | G | SNP | 0 0 | 0 1 | 79 1 | 2 11  |
| Chr10 | 48292473 | 48292473 | T | A | SNP | 0 0 | 0 1 | 24 1 | 2 8   |
| Chr10 | 48294007 | 48294007 | C | G | SNP | 0 1 | 0 1 | 53 7 | 3 9   |
| Chr10 | 48296350 | 48296350 | A | T | SNP | 0 1 | 0 1 | 23 2 | 4 4   |
| Chr10 | 48296714 | 48296714 | A | T | SNP | 0 0 | 0 1 | 28 0 | 2 10  |
| Chr10 | 48299992 | 48299992 | A | G | SNP | 0 0 | 0 1 | 40 2 | 5 18  |
| Chr10 | 48300216 | 48300216 | T | C | SNP | 0 0 | 0 1 | 40 1 | 5 12  |
| Chr10 | 48304438 | 48304438 | G | C | SNP | 0 1 | 0 1 | 16 3 | 1 7   |
| Chr10 | 48304612 | 48304612 | A | G | SNP | 0 0 | 0 1 | 42 0 | 4 9   |
| Chr10 | 48304629 | 48304629 | T | A | SNP | 0 0 | 0 1 | 39 0 | 4 9   |



|       |          |          |   |   |     |     |     |      |       |
|-------|----------|----------|---|---|-----|-----|-----|------|-------|
| Chr10 | 48304831 | 48304831 | G | A | SNP | 0 0 | 0 1 | 30 0 | 2 11  |
| Chr10 | 48305914 | 48305914 | A | T | SNP | 0 0 | 0 1 | 40 1 | 2 11  |
| Chr10 | 48306059 | 48306059 | T | C | SNP | 0 0 | 0 1 | 39 1 | 2 13  |
| Chr10 | 48306195 | 48306195 | A | T | SNP | 0 1 | 0 1 | 40 3 | 10 10 |
| Chr10 | 48306205 | 48306205 | C | A | SNP | 0 0 | 0 1 | 44 3 | 10 8  |
| Chr10 | 48306326 | 48306326 | G | T | SNP | 0 0 | 0 1 | 50 4 | 6 12  |
| Chr10 | 48307575 | 48307575 | A | C | SNP | 0 0 | 0 1 | 43 2 | 8 10  |
| Chr10 | 48307983 | 48307983 | G | A | SNP | 0 0 | 0 1 | 31 1 | 2 8   |
| Chr10 | 48308210 | 48308210 | G | T | SNP | 0 0 | 0 1 | 63 2 | 4 14  |
| Chr10 | 48308537 | 48308537 | G | A | SNP | 0 0 | 0 1 | 37 0 | 5 8   |
| Chr10 | 48308538 | 48308538 | T | A | SNP | 0 0 | 0 1 | 37 0 | 5 8   |
| Chr10 | 48309399 | 48309399 | C | G | SNP | 0 0 | 0 1 | 26 1 | 3 12  |
| Chr10 | 48310482 | 48310482 | A | G | SNP | 0 0 | 0 1 | 29 0 | 6 16  |
| Chr10 | 48310796 | 48310796 | C | A | SNP | 0 0 | 0 1 | 50 1 | 8 11  |
| Chr10 | 48310915 | 48310915 | A | C | SNP | 0 0 | 0 1 | 45 1 | 2 18  |
| Chr10 | 48311131 | 48311131 | C | T | SNP | 0 0 | 1 1 | 46 4 | 2 16  |
| Chr10 | 48311243 | 48311243 | G | A | SNP | 0 0 | 0 1 | 53 3 | 4 13  |
| Chr10 | 48311413 | 48311413 | A | G | SNP | 0 0 | 0 1 | 51 2 | 2 10  |
| Chr10 | 48311751 | 48311751 | C | T | SNP | 0 0 | 0 1 | 57 3 | 4 11  |
| Chr10 | 48311840 | 48311840 | C | T | SNP | 0 0 | 0 1 | 65 3 | 12 12 |
| Chr10 | 48312410 | 48312410 | T | C | SNP | 0 1 | 0 1 | 43 5 | 5 24  |
| Chr10 | 48312505 | 48312505 | C | T | SNP | 0 0 | 0 1 | 52 3 | 6 15  |
| Chr10 | 48312521 | 48312521 | T | G | SNP | 0 0 | 0 1 | 51 3 | 5 15  |
| Chr10 | 48312523 | 48312523 | T | G | SNP | 0 0 | 0 1 | 51 3 | 5 15  |
| Chr10 | 48312534 | 48312534 | C | G | SNP | 0 1 | 0 1 | 47 4 | 5 15  |
| Chr10 | 48312538 | 48312538 | C | T | SNP | 0 1 | 0 1 | 44 4 | 5 16  |
| Chr10 | 48312605 | 48312605 | C | G | SNP | 0 1 | 0 1 | 37 3 | 4 9   |
| Chr10 | 48312646 | 48312646 | C | A | SNP | 0 1 | 0 1 | 32 4 | 4 10  |
| Chr10 | 48312737 | 48312737 | G | C | SNP | 0 0 | 0 1 | 38 1 | 2 15  |
| Chr10 | 48312797 | 48312797 | T | C | SNP | 0 0 | 0 1 | 41 0 | 6 17  |
| Chr10 | 48312812 | 48312812 | T | G | SNP | 0 0 | 0 1 | 39 0 | 6 17  |
| Chr10 | 48312824 | 48312824 | A | T | SNP | 0 0 | 0 1 | 37 0 | 7 9   |
| Chr10 | 48312826 | 48312826 | C | A | SNP | 0 0 | 0 1 | 40 0 | 7 9   |
| Chr10 | 48312863 | 48312863 | A | G | SNP | 0 1 | 0 1 | 38 3 | 5 10  |
| Chr10 | 48312895 | 48312895 | A | T | SNP | 0 0 | 0 1 | 42 3 | 9 11  |
| Chr10 | 48312897 | 48312897 | T | G | SNP | 0 0 | 0 1 | 43 3 | 9 11  |
| Chr10 | 48312937 | 48312937 | T | C | SNP | 0 1 | 0 1 | 42 7 | 5 12  |
| Chr10 | 48312999 | 48312999 | C | T | SNP | 0 1 | 0 1 | 38 5 | 4 13  |
| Chr10 | 48313520 | 48313520 | G | A | SNP | 0 0 | 0 1 | 29 0 | 5 4   |
| Chr10 | 48313586 | 48313586 | G | A | SNP | 0 0 | 0 1 | 26 1 | 4 4   |
| Chr10 | 48313695 | 48313695 | A | G | SNP | 0 1 | 0 1 | 14 2 | 4 8   |
| Chr10 | 48313702 | 48313702 | G | C | SNP | 0 1 | 0 1 | 15 2 | 5 10  |

|       |          |          |   |   |     |     |     |      |       |
|-------|----------|----------|---|---|-----|-----|-----|------|-------|
| Chr10 | 48313802 | 48313802 | A | G | SNP | 0 0 | 0 1 | 290  | 5 10  |
| Chr10 | 48314005 | 48314005 | G | A | SNP | 0 0 | 0 1 | 33 3 | 4 7   |
| Chr10 | 48314114 | 48314114 | A | T | SNP | 0 0 | 0 1 | 30 2 | 2 10  |
| Chr10 | 48314180 | 48314180 | T | G | SNP | 0 0 | 0 1 | 37 2 | 8 11  |
| Chr10 | 48314249 | 48314249 | C | T | SNP | 0 1 | 0 1 | 35 3 | 9 10  |
| Chr10 | 48314305 | 48314305 | T | C | SNP | 0 1 | 0 1 | 34 4 | 9 14  |
| Chr10 | 48314380 | 48314380 | T | A | SNP | 0 1 | 0 1 | 37 4 | 1 11  |
| Chr10 | 48314386 | 48314386 | A | T | SNP | 0 1 | 0 1 | 36 4 | 1 11  |
| Chr10 | 48314442 | 48314442 | A | C | SNP | 0 0 | 0 1 | 37 1 | 1 8   |
| Chr10 | 48314946 | 48314946 | T | A | SNP | 0 1 | 0 1 | 38 3 | 7 7   |
| Chr10 | 48315006 | 48315006 | T | C | SNP | 0 0 | 0 1 | 39 2 | 8 8   |
| Chr10 | 48315128 | 48315128 | T | C | SNP | 0 1 | 0 1 | 42 6 | 5 16  |
| Chr10 | 48315338 | 48315338 | A | T | SNP | 0 0 | 0 1 | 28 2 | 6 9   |
| Chr10 | 48315347 | 48315347 | A | T | SNP | 0 1 | 0 1 | 27 2 | 5 7   |
| Chr10 | 48315430 | 48315430 | C | A | SNP | 0 1 | 0 1 | 37 3 | 6 10  |
| Chr10 | 48316118 | 48316118 | G | T | SNP | 0 0 | 0 1 | 16 1 | 8 10  |
| Chr10 | 48316878 | 48316878 | A | G | SNP | 0 0 | 0 1 | 16 0 | 2 7   |
| Chr10 | 48318123 | 48318123 | A | G | SNP | 0 0 | 0 1 | 10 0 | 2 8   |
| Chr10 | 48318159 | 48318159 | A | G | SNP | 0 0 | 0 1 | 9 0  | 2 8   |
| Chr10 | 48321570 | 48321570 | C | A | SNP | 0 0 | 0 1 | 21 1 | 5 7   |
| Chr10 | 48322132 | 48322132 | A | G | SNP | 0 0 | 0 1 | 35 0 | 5 3   |
| Chr10 | 48322465 | 48322465 | T | A | SNP | 0 0 | 0 1 | 46 1 | 9 9   |
| Chr10 | 48324168 | 48324168 | A | T | SNP | 0 1 | 0 1 | 20 2 | 2 6   |
| Chr10 | 48324271 | 48324271 | T | G | SNP | 0 0 | 0 1 | 27 1 | 1 9   |
| Chr10 | 48324684 | 48324684 | A | C | SNP | 0 0 | 0 1 | 24 1 | 1 8   |
| Chr10 | 48324748 | 48324748 | A | G | SNP | 0 0 | 0 1 | 33 1 | 1 7   |
| Chr10 | 48325841 | 48325841 | C | G | SNP | 0 1 | 0 1 | 27 5 | 5 9   |
| Chr10 | 48326406 | 48326406 | T | A | SNP | 0 1 | 0 1 | 34 3 | 2 6   |
| Chr10 | 48326528 | 48326528 | G | A | SNP | 0 0 | 0 1 | 45 5 | 10 11 |
| Chr10 | 48326904 | 48326904 | G | A | SNP | 0 1 | 0 1 | 50 4 | 3 14  |
| Chr10 | 48327084 | 48327084 | T | G | SNP | 0 1 | 0 1 | 19 4 | 2 12  |
| Chr10 | 48327349 | 48327349 | A | G | SNP | 0 1 | 0 1 | 32 4 | 3 9   |
| Chr10 | 48327713 | 48327713 | A | G | SNP | 0 0 | 0 1 | 66 1 | 7 24  |
| Chr10 | 48328186 | 48328186 | A | T | SNP | 0 0 | 0 1 | 53 4 | 6 14  |
| Chr10 | 48328296 | 48328296 | C | G | SNP | 0 0 | 0 1 | 55 0 | 9 13  |
| Chr10 | 48328865 | 48328865 | C | T | SNP | 0 0 | 0 1 | 13 0 | 3 5   |
| Chr10 | 48328949 | 48328949 | G | T | SNP | 0 0 | 0 1 | 18 0 | 2 7   |
| Chr10 | 48331567 | 48331567 | C | G | SNP | 0 0 | 0 1 | 33 1 | 3 13  |
| Chr10 | 48331792 | 48331792 | A | G | SNP | 0 1 | 0 1 | 43 4 | 1 10  |
| Chr10 | 48332365 | 48332365 | G | C | SNP | 0 1 | 0 1 | 33 4 | 3 8   |
| Chr10 | 48333876 | 48333876 | C | A | SNP | 0 0 | 0 1 | 43 0 | 6 14  |
| Chr10 | 48335105 | 48335105 | T | C | SNP | 0 0 | 0 1 | 72 0 | 6 16  |

|       |          |          |   |   |     |     |     |      |       |
|-------|----------|----------|---|---|-----|-----|-----|------|-------|
| Chr10 | 48335278 | 48335278 | T | C | SNP | 0 0 | 1 1 | 794  | 1 21  |
| Chr10 | 48335590 | 48335590 | T | A | SNP | 0 0 | 0 1 | 49 1 | 6 15  |
| Chr10 | 48335885 | 48335885 | C | T | SNP | 0 0 | 0 1 | 49 2 | 1 12  |
| Chr10 | 48335969 | 48335969 | A | C | SNP | 0 0 | 0 1 | 58 6 | 7 11  |
| Chr10 | 48336236 | 48336236 | G | T | SNP | 0 0 | 0 1 | 52 2 | 5 12  |
| Chr10 | 48336471 | 48336471 | A | G | SNP | 0 0 | 0 1 | 56 2 | 3 14  |
| Chr10 | 48336684 | 48336684 | A | T | SNP | 0 0 | 0 1 | 45 3 | 4 10  |
| Chr10 | 48336808 | 48336808 | A | G | SNP | 0 0 | 0 1 | 49 2 | 11 17 |
| Chr10 | 48337240 | 48337240 | C | T | SNP | 0 0 | 0 1 | 53 1 | 2 9   |
| Chr10 | 48337257 | 48337257 | T | C | SNP | 0 0 | 0 1 | 51 1 | 3 14  |
| Chr10 | 48337269 | 48337269 | T | C | SNP | 0 0 | 0 1 | 46 1 | 4 12  |
| Chr10 | 48337316 | 48337316 | C | T | SNP | 0 0 | 0 1 | 40 1 | 3 14  |
| Chr10 | 48337328 | 48337328 | G | A | SNP | 0 0 | 0 1 | 41 1 | 3 12  |
| Chr10 | 48337374 | 48337374 | C | T | SNP | 0 0 | 0 1 | 39 0 | 5 13  |
| Chr10 | 48337376 | 48337376 | G | C | SNP | 0 0 | 0 1 | 39 0 | 5 14  |
| Chr10 | 48337477 | 48337477 | G | C | SNP | 0 1 | 0 1 | 37 3 | 7 8   |
| Chr10 | 48337489 | 48337489 | T | C | SNP | 0 1 | 0 1 | 38 3 | 6 6   |
| Chr10 | 48337550 | 48337550 | G | A | SNP | 0 0 | 0 1 | 42 3 | 7 4   |
| Chr10 | 48337589 | 48337589 | G | C | SNP | 0 0 | 0 1 | 45 3 | 7 5   |
| Chr10 | 48337768 | 48337768 | A | G | SNP | 0 0 | 0 1 | 40 0 | 5 3   |
| Chr10 | 48337886 | 48337886 | T | C | SNP | 0 0 | 0 1 | 21 0 | 9 4   |
| Chr10 | 48337892 | 48337892 | G | A | SNP | 0 0 | 0 1 | 20 0 | 9 4   |
| Chr10 | 48337926 | 48337926 | A | G | SNP | 0 0 | 0 1 | 21 0 | 8 4   |
| Chr10 | 48337946 | 48337946 | A | G | SNP | 0 0 | 0 1 | 20 0 | 8 4   |
| Chr10 | 48337953 | 48337953 | C | T | SNP | 0 0 | 0 1 | 21 0 | 8 4   |
| Chr10 | 48338067 | 48338067 | G | T | SNP | 0 0 | 0 1 | 27 0 | 7 5   |
| Chr10 | 48338074 | 48338074 | C | T | SNP | 0 0 | 0 1 | 26 0 | 7 5   |
| Chr10 | 48338086 | 48338086 | C | T | SNP | 0 0 | 0 1 | 31 0 | 6 5   |
| Chr10 | 48338093 | 48338093 | T | C | SNP | 0 0 | 0 1 | 32 0 | 6 5   |
| Chr10 | 48338400 | 48338400 | C | T | SNP | 0 0 | 0 1 | 44 3 | 5 7   |
| Chr10 | 48338721 | 48338721 | C | T | SNP | 0 0 | 0 1 | 36 0 | 2 6   |
| Chr10 | 48339194 | 48339194 | G | C | SNP | 0 0 | 0 1 | 29 0 | 6 11  |
| Chr10 | 48341587 | 48341587 | C | T | SNP | 0 0 | 0 1 | 18 0 | 4 10  |
| Chr10 | 48342291 | 48342291 | C | G | SNP | 0 0 | 0 1 | 45 0 | 1 8   |
| Chr10 | 48342675 | 48342675 | T | C | SNP | 0 0 | 0 1 | 27 0 | 1 8   |
| Chr10 | 48342720 | 48342720 | T | A | SNP | 0 0 | 1 1 | 18 0 | 0 10  |
| Chr10 | 48344148 | 48344148 | C | T | SNP | 0 0 | 0 1 | 51 3 | 11 24 |
| Chr10 | 48344287 | 48344287 | G | A | SNP | 0 0 | 0 1 | 68 4 | 7 13  |
| Chr10 | 48344980 | 48344980 | T | G | SNP | 0 0 | 0 1 | 41 2 | 4 24  |
| Chr10 | 48345658 | 48345658 | A | C | SNP | 0 0 | 0 1 | 53 2 | 5 11  |
| Chr10 | 48345795 | 48345795 | C | A | SNP | 0 0 | 0 1 | 31 1 | 2 9   |
| Chr10 | 48346578 | 48346578 | T | A | SNP | 0 0 | 0 1 | 58 0 | 5 15  |

|       |          |          |   |   |     |     |     |      |       |
|-------|----------|----------|---|---|-----|-----|-----|------|-------|
| Chr10 | 48347436 | 48347436 | G | A | SNP | 0 0 | 0 1 | 59 4 | 4 14  |
| Chr10 | 48347543 | 48347543 | A | C | SNP | 0 0 | 0 1 | 58 1 | 3 10  |
| Chr10 | 48347975 | 48347975 | G | A | SNP | 0 0 | 0 1 | 61 2 | 7 15  |
| Chr10 | 48348238 | 48348238 | T | C | SNP | 0 0 | 0 1 | 67 0 | 4 20  |
| Chr10 | 48348273 | 48348273 | G | A | SNP | 0 0 | 0 1 | 69 0 | 5 23  |
| Chr10 | 48348670 | 48348670 | G | A | SNP | 0 0 | 0 1 | 43 2 | 1 11  |
| Chr10 | 48348719 | 48348719 | T | C | SNP | 0 0 | 0 1 | 32 1 | 6 8   |
| Chr10 | 48348860 | 48348860 | G | T | SNP | 0 0 | 0 1 | 40 2 | 8 10  |
| Chr10 | 48349113 | 48349113 | C | T | SNP | 0 1 | 0 1 | 52 4 | 12 11 |
| Chr10 | 48350115 | 48350115 | G | C | SNP | 0 0 | 0 1 | 74 3 | 8 14  |
| Chr10 | 48350643 | 48350643 | C | A | SNP | 0 1 | 0 1 | 51 4 | 1 13  |
| Chr10 | 48350929 | 48350929 | G | T | SNP | 0 1 | 0 1 | 22 3 | 11 9  |
| Chr10 | 48351188 | 48351188 | A | C | SNP | 0 1 | 0 1 | 39 3 | 2 14  |
| Chr10 | 48351337 | 48351337 | A | G | SNP | 0 0 | 0 1 | 45 2 | 4 9   |
| Chr10 | 48351920 | 48351920 | G | A | SNP | 0 0 | 0 1 | 63 1 | 10 14 |
| Chr10 | 48351970 | 48351970 | G | A | SNP | 0 0 | 0 1 | 53 1 | 8 17  |
| Chr10 | 48351974 | 48351974 | C | G | SNP | 0 0 | 0 1 | 53 1 | 8 19  |
| Chr10 | 48352004 | 48352004 | A | G | SNP | 0 0 | 0 1 | 46 0 | 5 17  |
| Chr10 | 48352196 | 48352196 | C | T | SNP | 0 0 | 0 1 | 13 0 | 2 7   |
| Chr10 | 48353297 | 48353297 | G | A | SNP | 0 0 | 0 1 | 40 2 | 3 25  |
| Chr10 | 48353449 | 48353449 | C | T | SNP | 0 0 | 0 1 | 54 2 | 6 17  |
| Chr10 | 48353603 | 48353603 | T | C | SNP | 0 0 | 0 1 | 33 2 | 6 9   |
| Chr10 | 48353653 | 48353653 | G | A | SNP | 0 0 | 0 1 | 36 1 | 6 13  |
| Chr10 | 48353944 | 48353944 | A | T | SNP | 0 0 | 0 1 | 30 1 | 3 6   |
| Chr10 | 48354706 | 48354706 | G | T | SNP | 0 0 | 0 1 | 61 3 | 6 16  |
| Chr10 | 48357226 | 48357226 | G | A | SNP | 0 1 | 0 1 | 38 5 | 1 7   |
| Chr10 | 48360130 | 48360130 | T | G | SNP | 0 1 | 0 1 | 35 3 | 4 6   |
| Chr10 | 48360131 | 48360131 | G | A | SNP | 0 1 | 0 1 | 34 3 | 4 5   |
| Chr10 | 48360133 | 48360133 | T | A | SNP | 0 1 | 0 1 | 33 3 | 4 5   |
| Chr10 | 48361583 | 48361583 | G | A | SNP | 0 0 | 0 1 | 17 0 | 2 7   |
| Chr10 | 48361623 | 48361623 | T | C | SNP | 0 0 | 1 1 | 18 0 | 0 8   |
| Chr10 | 48361679 | 48361679 | A | T | SNP | 0 0 | 0 1 | 28 0 | 1 12  |
| Chr10 | 48362089 | 48362089 | C | A | SNP | 0 1 | 0 1 | 67 6 | 5 12  |
| Chr10 | 48362412 | 48362412 | T | C | SNP | 0 0 | 0 1 | 51 1 | 4 13  |
| Chr10 | 48363275 | 48363275 | C | T | SNP | 0 0 | 0 1 | 19 1 | 3 11  |
| Chr10 | 48363756 | 48363756 | A | T | SNP | 0 0 | 0 1 | 66 3 | 4 8   |
| Chr10 | 48364484 | 48364484 | A | G | SNP | 0 0 | 0 1 | 44 1 | 5 10  |
| Chr10 | 48366859 | 48366859 | G | A | SNP | 0 1 | 0 1 | 41 3 | 3 5   |
| Chr10 | 48366926 | 48366926 | G | A | SNP | 0 0 | 0 1 | 33 0 | 5 4   |
| Chr10 | 48369022 | 48369022 | C | T | SNP | 0 0 | 0 1 | 35 0 | 8 8   |
| Chr10 | 48369291 | 48369291 | G | A | SNP | 0 0 | 0 1 | 63 0 | 3 8   |
| Chr10 | 48370133 | 48370133 | C | A | SNP | 0 0 | 0 1 | 45 3 | 10 15 |

|       |          |          |   |   |     |     |     |      |       |
|-------|----------|----------|---|---|-----|-----|-----|------|-------|
| Chr10 | 48370163 | 48370163 | G | A | SNP | 0 0 | 0 1 | 45 4 | 11 12 |
| Chr10 | 48370405 | 48370405 | T | G | SNP | 0 1 | 0 1 | 61 8 | 13 18 |
| Chr10 | 48370461 | 48370461 | T | C | SNP | 0 0 | 0 1 | 53 3 | 12 21 |
| Chr10 | 48370478 | 48370478 | G | A | SNP | 0 0 | 0 1 | 50 3 | 11 23 |
| Chr10 | 48370529 | 48370529 | G | A | SNP | 0 0 | 0 1 | 42 2 | 9 23  |
| Chr10 | 48370596 | 48370596 | A | G | SNP | 0 1 | 0 1 | 25 2 | 5 15  |
| Chr10 | 48370613 | 48370613 | C | G | SNP | 0 1 | 0 1 | 20 2 | 3 15  |
| Chr10 | 48370694 | 48370694 | C | T | SNP | 0 1 | 0 1 | 33 3 | 5 15  |
| Chr10 | 48370874 | 48370874 | G | A | SNP | 0 0 | 0 1 | 45 1 | 5 5   |
| Chr10 | 48370882 | 48370882 | G | A | SNP | 0 0 | 0 1 | 51 1 | 4 4   |
| Chr10 | 48370921 | 48370921 | C | T | SNP | 0 0 | 0 1 | 57 1 | 7 6   |
| Chr10 | 48371650 | 48371650 | T | C | SNP | 0 0 | 0 1 | 49 0 | 6 18  |
| Chr10 | 48373869 | 48373869 | A | T | SNP | 0 0 | 0 1 | 26 1 | 1 8   |
| Chr10 | 48373905 | 48373905 | C | A | SNP | 0 0 | 0 1 | 25 1 | 3 7   |
| Chr10 | 48373911 | 48373911 | A | G | SNP | 0 0 | 0 1 | 24 1 | 4 7   |
| Chr10 | 48374020 | 48374020 | T | C | SNP | 0 1 | 0 1 | 19 2 | 9 10  |
| Chr10 | 48374041 | 48374041 | C | T | SNP | 0 1 | 0 1 | 19 2 | 8 12  |
| Chr10 | 48374079 | 48374079 | G | A | SNP | 0 1 | 0 1 | 27 2 | 6 10  |
| Chr10 | 48374109 | 48374109 | C | T | SNP | 0 0 | 0 1 | 28 1 | 8 7   |
| Chr10 | 48374196 | 48374196 | A | T | SNP | 0 0 | 0 1 | 40 0 | 3 5   |
| Chr10 | 48374223 | 48374223 | G | A | SNP | 0 0 | 0 1 | 28 0 | 4 4   |
| Chr10 | 48374231 | 48374231 | A | G | SNP | 0 0 | 0 1 | 30 0 | 6 4   |
| Chr10 | 48375059 | 48375059 | C | A | SNP | 0 0 | 0 1 | 15 1 | 4 5   |
| Chr10 | 48375334 | 48375334 | T | G | SNP | 0 0 | 0 1 | 35 2 | 5 9   |
| Chr10 | 48375657 | 48375657 | T | A | SNP | 0 0 | 0 1 | 72 5 | 4 14  |
| Chr10 | 48375699 | 48375699 | G | A | SNP | 0 0 | 0 1 | 69 3 | 3 11  |
| Chr10 | 48376493 | 48376493 | A | G | SNP | 0 0 | 0 1 | 49 3 | 5 15  |
| Chr10 | 48380735 | 48380735 | T | C | SNP | 0 0 | 0 1 | 58 2 | 4 11  |
| Chr10 | 48380811 | 48380811 | A | T | SNP | 0 0 | 0 1 | 42 3 | 3 5   |
| Chr10 | 48381563 | 48381563 | C | T | SNP | 0 0 | 0 1 | 44 1 | 2 8   |
| Chr10 | 48382152 | 48382152 | A | T | SNP | 0 0 | 1 1 | 11 0 | 0 10  |
| Chr10 | 48382229 | 48382229 | T | C | SNP | 0 0 | 0 1 | 33 0 | 3 11  |
| Chr10 | 48382292 | 48382292 | C | T | SNP | 0 0 | 0 1 | 35 0 | 3 7   |
| Chr10 | 48382599 | 48382599 | A | G | SNP | 0 0 | 0 1 | 60 4 | 7 16  |
| Chr10 | 48382747 | 48382747 | G | T | SNP | 0 1 | 0 1 | 48 4 | 8 20  |
| Chr10 | 48382874 | 48382874 | T | C | SNP | 0 1 | 0 1 | 54 7 | 10 10 |
| Chr10 | 48382911 | 48382911 | T | C | SNP | 0 1 | 0 1 | 52 4 | 8 10  |
| Chr10 | 48384912 | 48384912 | A | G | SNP | 0 0 | 0 1 | 35 2 | 3 13  |
| Chr10 | 48385158 | 48385158 | C | G | SNP | 0 0 | 0 1 | 47 2 | 1 10  |
| Chr10 | 48388028 | 48388028 | A | T | SNP | 0 0 | 0 1 | 45 1 | 3 11  |
| Chr10 | 48388553 | 48388553 | G | A | SNP | 0 0 | 0 1 | 56 1 | 5 20  |
| Chr10 | 48389149 | 48389149 | A | G | SNP | 0 1 | 0 1 | 31 4 | 3 17  |

|       |          |          |   |   |     |     |     |      |      |
|-------|----------|----------|---|---|-----|-----|-----|------|------|
| Chr10 | 48391030 | 48391030 | T | C | SNP | 0 0 | 0 1 | 160  | 1 7  |
| Chr10 | 48393171 | 48393171 | G | C | SNP | 0 0 | 0 1 | 37 1 | 5 12 |
| Chr10 | 48393727 | 48393727 | A | G | SNP | 0 0 | 0 1 | 19 0 | 3 7  |
| Chr10 | 48393758 | 48393758 | G | A | SNP | 0 0 | 0 1 | 17 0 | 3 6  |
| Chr10 | 48393763 | 48393763 | C | T | SNP | 0 0 | 0 1 | 16 0 | 3 6  |
| Chr10 | 48393804 | 48393804 | G | A | SNP | 0 0 | 0 1 | 14 0 | 3 5  |
| Chr10 | 48393810 | 48393810 | G | A | SNP | 0 0 | 0 1 | 15 0 | 3 5  |
| Chr10 | 48393855 | 48393855 | C | T | SNP | 0 0 | 0 1 | 18 0 | 2 6  |
| Chr10 | 48393875 | 48393875 | G | C | SNP | 0 0 | 0 1 | 23 0 | 1 7  |
| Chr10 | 48393959 | 48393959 | C | T | SNP | 0 0 | 0 1 | 32 0 | 4 8  |
| Chr10 | 48393987 | 48393987 | C | T | SNP | 0 0 | 0 1 | 29 1 | 4 8  |
| Chr10 | 48394001 | 48394001 | C | T | SNP | 0 1 | 0 1 | 29 3 | 5 11 |
| Chr10 | 48394004 | 48394004 | A | G | SNP | 0 1 | 0 1 | 30 4 | 5 11 |
| Chr10 | 48396230 | 48396230 | C | T | SNP | 0 0 | 0 1 | 50 1 | 6 9  |
| Chr10 | 48396273 | 48396273 | A | G | SNP | 0 0 | 0 1 | 47 1 | 5 11 |
| Chr10 | 48398769 | 48398769 | A | T | SNP | 0 0 | 0 1 | 31 1 | 8 9  |
| Chr10 | 48398948 | 48398948 | T | G | SNP | 0 0 | 0 1 | 30 1 | 1 12 |
| Chr10 | 48399130 | 48399130 | T | C | SNP | 0 0 | 0 1 | 32 1 | 5 10 |
| Chr10 | 48399462 | 48399462 | G | T | SNP | 0 1 | 0 1 | 19 2 | 2 10 |
| Chr10 | 48400425 | 48400425 | T | C | SNP | 0 0 | 0 1 | 26 0 | 2 6  |
| Chr10 | 48400891 | 48400891 | C | T | SNP | 0 0 | 0 1 | 49 0 | 4 8  |
| Chr10 | 48400896 | 48400896 | C | A | SNP | 0 0 | 0 1 | 45 0 | 4 8  |
| Chr10 | 48402259 | 48402259 | A | C | SNP | 0 0 | 0 1 | 49 1 | 8 13 |
| Chr10 | 48403178 | 48403178 | T | A | SNP | 0 0 | 0 1 | 30 0 | 3 7  |
| Chr10 | 48405391 | 48405391 | A | C | SNP | 0 0 | 0 1 | 15 0 | 2 7  |
| Chr10 | 48406017 | 48406017 | T | A | SNP | 0 0 | 0 1 | 31 0 | 2 6  |
| Chr10 | 48406123 | 48406123 | G | A | SNP | 0 0 | 0 1 | 39 1 | 3 9  |
| Chr10 | 48406126 | 48406126 | T | C | SNP | 0 0 | 0 1 | 39 1 | 4 8  |
| Chr10 | 48406160 | 48406160 | A | C | SNP | 0 0 | 0 1 | 34 1 | 5 8  |
| Chr10 | 48406171 | 48406171 | T | C | SNP | 0 0 | 0 1 | 36 1 | 5 10 |
| Chr10 | 48406267 | 48406267 | A | G | SNP | 0 0 | 0 1 | 50 0 | 6 12 |
| Chr10 | 48406272 | 48406272 | C | T | SNP | 0 0 | 0 1 | 52 0 | 6 12 |
| Chr10 | 48406297 | 48406297 | C | T | SNP | 0 0 | 0 1 | 55 1 | 6 15 |
| Chr10 | 48406549 | 48406549 | G | T | SNP | 0 0 | 0 1 | 60 1 | 6 15 |
| Chr10 | 48406798 | 48406798 | A | G | SNP | 0 0 | 0 1 | 48 0 | 8 14 |
| Chr10 | 48408367 | 48408367 | A | T | SNP | 0 0 | 0 1 | 55 0 | 6 12 |
| Chr10 | 48408622 | 48408622 | T | C | SNP | 0 0 | 0 1 | 42 3 | 5 18 |
| Chr10 | 48408663 | 48408663 | G | A | SNP | 0 1 | 0 1 | 49 5 | 3 19 |
| Chr10 | 48409246 | 48409246 | T | A | SNP | 0 0 | 0 1 | 75 2 | 6 15 |
| Chr10 | 48409781 | 48409781 | A | C | SNP | 0 0 | 0 1 | 50 2 | 8 11 |
| Chr10 | 48409963 | 48409963 | C | T | SNP | 0 0 | 0 1 | 34 0 | 7 12 |
| Chr10 | 48410228 | 48410228 | T | C | SNP | 0 0 | 0 1 | 27 1 | 3 5  |

|       |          |          |   |   |     |     |     |      |       |
|-------|----------|----------|---|---|-----|-----|-----|------|-------|
| Chr10 | 48410523 | 48410523 | T | A | SNP | 0 0 | 0 1 | 45 0 | 2 12  |
| Chr10 | 48412209 | 48412209 | T | A | SNP | 0 0 | 0 1 | 68 0 | 1 12  |
| Chr10 | 48412835 | 48412835 | G | A | SNP | 0 1 | 0 1 | 61 5 | 9 15  |
| Chr10 | 48412951 | 48412951 | G | A | SNP | 0 0 | 0 1 | 40 1 | 5 16  |
| Chr10 | 48415542 | 48415542 | A | G | SNP | 0 0 | 0 1 | 10 0 | 4 5   |
| Chr10 | 48415988 | 48415988 | C | T | SNP | 0 0 | 0 1 | 13 0 | 4 4   |
| Chr10 | 48416953 | 48416953 | T | G | SNP | 0 0 | 0 1 | 38 0 | 2 11  |
| Chr10 | 48417269 | 48417269 | C | T | SNP | 0 0 | 0 1 | 42 0 | 5 13  |
| Chr10 | 48417417 | 48417417 | C | A | SNP | 0 0 | 0 1 | 26 0 | 2 6   |
| Chr10 | 48417462 | 48417462 | C | G | SNP | 0 0 | 0 1 | 23 0 | 2 6   |
| Chr10 | 48417942 | 48417942 | C | T | SNP | 0 0 | 0 1 | 30 0 | 3 8   |
| Chr10 | 48418354 | 48418354 | G | A | SNP | 0 0 | 0 1 | 45 2 | 9 13  |
| Chr10 | 48418675 | 48418675 | T | C | SNP | 0 0 | 0 1 | 22 0 | 3 11  |
| Chr10 | 48419781 | 48419781 | A | T | SNP | 0 0 | 0 1 | 46 1 | 5 14  |
| Chr10 | 48420097 | 48420097 | A | T | SNP | 0 0 | 0 1 | 22 0 | 5 4   |
| Chr10 | 48420113 | 48420113 | T | C | SNP | 0 0 | 0 1 | 23 0 | 5 4   |
| Chr10 | 48421664 | 48421664 | C | T | SNP | 0 0 | 0 1 | 14 1 | 2 10  |
| Chr10 | 48421781 | 48421781 | A | T | SNP | 0 0 | 0 1 | 10 0 | 3 6   |
| Chr10 | 48421782 | 48421782 | A | T | SNP | 0 0 | 0 1 | 10 0 | 3 6   |
| Chr10 | 48423831 | 48423831 | A | C | SNP | 0 1 | 0 1 | 73 9 | 8 11  |
| Chr10 | 48425086 | 48425086 | C | G | SNP | 0 0 | 0 1 | 46 3 | 7 14  |
| Chr10 | 48425151 | 48425151 | T | C | SNP | 0 0 | 0 1 | 37 3 | 9 13  |
| Chr10 | 48425370 | 48425370 | G | T | SNP | 0 0 | 0 1 | 24 1 | 5 14  |
| Chr10 | 48426462 | 48426462 | A | G | SNP | 0 0 | 0 1 | 16 1 | 4 5   |
| Chr10 | 48426907 | 48426907 | A | T | SNP | 0 0 | 0 1 | 17 0 | 1 9   |
| Chr10 | 48429086 | 48429086 | A | G | SNP | 0 0 | 0 1 | 15 1 | 5 3   |
| Chr10 | 48429306 | 48429306 | G | A | SNP | 0 1 | 0 1 | 12 1 | 3 10  |
| Chr10 | 48430696 | 48430696 | C | A | SNP | 0 0 | 0 1 | 24 1 | 2 6   |
| Chr10 | 48431629 | 48431629 | A | G | SNP | 0 0 | 0 1 | 9 0  | 4 4   |
| Chr10 | 48433526 | 48433526 | A | G | SNP | 0 0 | 0 1 | 36 1 | 5 10  |
| Chr10 | 48433614 | 48433614 | T | G | SNP | 0 0 | 0 1 | 34 2 | 11 11 |
| Chr10 | 48433970 | 48433970 | T | C | SNP | 0 1 | 0 1 | 28 3 | 9 4   |
| Chr10 | 48434455 | 48434455 | C | A | SNP | 0 0 | 0 1 | 62 4 | 7 17  |
| Chr10 | 48435065 | 48435065 | A | G | SNP | 0 0 | 0 1 | 69 0 | 10 13 |
| Chr10 | 48435258 | 48435258 | G | A | SNP | 0 0 | 0 1 | 54 0 | 5 15  |
| Chr10 | 48435384 | 48435384 | A | G | SNP | 0 0 | 0 1 | 54 0 | 10 19 |
| Chr10 | 48435745 | 48435745 | C | T | SNP | 0 0 | 0 1 | 42 1 | 11 21 |
| Chr10 | 48435801 | 48435801 | A | C | SNP | 0 0 | 0 1 | 44 0 | 10 16 |
| Chr10 | 48435961 | 48435961 | G | T | SNP | 0 0 | 0 1 | 35 1 | 4 11  |
| Chr10 | 48435962 | 48435962 | G | C | SNP | 0 0 | 0 1 | 34 1 | 4 11  |
| Chr10 | 48435965 | 48435965 | C | T | SNP | 0 0 | 0 1 | 34 1 | 4 11  |
| Chr10 | 48435995 | 48435995 | A | G | SNP | 0 0 | 1 1 | 29 1 | 0 8   |

|       |          |          |   |   |     |     |     |      |       |
|-------|----------|----------|---|---|-----|-----|-----|------|-------|
| Chr10 | 48436014 | 48436014 | A | G | SNP | 0 0 | 1 1 | 19 1 | 0 8   |
| Chr10 | 48436018 | 48436018 | C | A | SNP | 0 0 | 1 1 | 18 1 | 0 9   |
| Chr10 | 48436019 | 48436019 | A | G | SNP | 0 0 | 1 1 | 18 1 | 0 9   |
| Chr10 | 48436024 | 48436024 | A | G | SNP | 0 0 | 1 1 | 19 1 | 0 9   |
| Chr10 | 48436029 | 48436029 | T | C | SNP | 0 0 | 1 1 | 19 0 | 0 9   |
| Chr10 | 48436040 | 48436040 | G | A | SNP | 0 0 | 0 1 | 18 0 | 1 7   |
| Chr10 | 48436051 | 48436051 | G | A | SNP | 0 0 | 0 1 | 19 0 | 1 7   |
| Chr10 | 48436054 | 48436054 | G | A | SNP | 0 0 | 0 1 | 19 0 | 1 7   |
| Chr10 | 48436063 | 48436063 | A | G | SNP | 0 0 | 0 1 | 20 0 | 2 7   |
| Chr10 | 48436064 | 48436064 | C | T | SNP | 0 0 | 0 1 | 20 0 | 2 7   |
| Chr10 | 48436310 | 48436310 | C | G | SNP | 0 0 | 1 1 | 32 0 | 0 10  |
| Chr10 | 48436329 | 48436329 | T | C | SNP | 0 0 | 1 1 | 28 0 | 0 10  |
| Chr10 | 48436439 | 48436439 | A | T | SNP | 0 0 | 0 1 | 22 0 | 2 9   |
| Chr10 | 48437811 | 48437811 | T | A | SNP | 0 0 | 0 1 | 26 1 | 3 15  |
| Chr10 | 48437999 | 48437999 | T | G | SNP | 0 0 | 0 1 | 40 0 | 5 20  |
| Chr10 | 48439199 | 48439199 | A | G | SNP | 0 0 | 0 1 | 45 1 | 3 10  |
| Chr10 | 48443507 | 48443507 | G | A | SNP | 0 0 | 1 1 | 41 1 | 0 12  |
| Chr10 | 48443701 | 48443701 | T | C | SNP | 0 1 | 1 1 | 11 1 | 0 9   |
| Chr10 | 48447777 | 48447777 | C | T | SNP | 0 0 | 0 1 | 50 0 | 6 4   |
| Chr10 | 48447790 | 48447790 | T | C | SNP | 0 0 | 0 1 | 49 0 | 8 6   |
| Chr10 | 48448066 | 48448066 | T | C | SNP | 0 0 | 0 1 | 23 0 | 2 10  |
| Chr10 | 48448324 | 48448324 | T | A | SNP | 0 0 | 0 1 | 34 2 | 1 18  |
| Chr10 | 48448402 | 48448402 | T | A | SNP | 0 0 | 0 1 | 35 1 | 3 13  |
| Chr10 | 48448712 | 48448712 | T | C | SNP | 0 0 | 0 1 | 51 3 | 4 18  |
| Chr10 | 48449596 | 48449596 | G | A | SNP | 0 0 | 0 1 | 47 4 | 9 35  |
| Chr10 | 48450184 | 48450184 | G | A | SNP | 0 0 | 0 1 | 30 1 | 5 9   |
| Chr10 | 48450501 | 48450501 | T | C | SNP | 0 0 | 0 1 | 14 1 | 2 6   |
| Chr10 | 48450506 | 48450506 | C | G | SNP | 0 0 | 0 1 | 14 1 | 2 6   |
| Chr10 | 48450518 | 48450518 | A | G | SNP | 0 0 | 0 1 | 14 1 | 2 6   |
| Chr10 | 48450521 | 48450521 | C | A | SNP | 0 0 | 0 1 | 14 1 | 2 6   |
| Chr10 | 48450524 | 48450524 | G | A | SNP | 0 0 | 0 1 | 14 1 | 2 6   |
| Chr10 | 48451344 | 48451344 | C | T | SNP | 0 0 | 0 1 | 19 0 | 3 5   |
| Chr10 | 48451414 | 48451414 | A | G | SNP | 0 0 | 0 1 | 19 0 | 3 5   |
| Chr10 | 48451825 | 48451825 | G | T | SNP | 0 0 | 0 1 | 49 3 | 6 6   |
| Chr10 | 48451942 | 48451942 | T | G | SNP | 0 0 | 0 1 | 56 4 | 4 14  |
| Chr10 | 48452314 | 48452314 | A | G | SNP | 0 0 | 0 1 | 59 2 | 2 7   |
| Chr10 | 48452899 | 48452899 | C | T | SNP | 0 0 | 0 1 | 29 1 | 3 11  |
| Chr10 | 48453204 | 48453204 | G | C | SNP | 0 0 | 0 1 | 35 1 | 6 9   |
| Chr10 | 48454151 | 48454151 | A | G | SNP | 0 0 | 0 1 | 40 1 | 6 4   |
| Chr10 | 48454363 | 48454363 | G | A | SNP | 0 1 | 0 1 | 40 3 | 10 13 |
| Chr10 | 48454528 | 48454528 | C | T | SNP | 0 0 | 0 1 | 42 2 | 7 6   |
| Chr10 | 48454582 | 48454582 | T | G | SNP | 0 0 | 0 1 | 48 1 | 7 3   |



|       |          |          |   |   |     |     |     |      |      |
|-------|----------|----------|---|---|-----|-----|-----|------|------|
| Chr10 | 48454599 | 48454599 | A | G | SNP | 0 0 | 0 1 | 43 1 | 8 5  |
| Chr10 | 48454619 | 48454619 | C | T | SNP | 0 0 | 0 1 | 43 1 | 8 5  |
| Chr10 | 48454655 | 48454655 | T | C | SNP | 0 0 | 0 1 | 43 0 | 6 9  |
| Chr10 | 48454662 | 48454662 | G | A | SNP | 0 0 | 0 1 | 45 0 | 5 10 |
| Chr10 | 48454668 | 48454668 | A | G | SNP | 0 0 | 0 1 | 46 0 | 5 10 |
| Chr10 | 48454738 | 48454738 | G | A | SNP | 0 0 | 0 1 | 48 3 | 4 18 |
| Chr10 | 48454751 | 48454751 | C | T | SNP | 0 0 | 0 1 | 51 3 | 4 17 |
| Chr10 | 48455258 | 48455258 | T | C | SNP | 0 0 | 0 1 | 55 0 | 8 9  |
| Chr10 | 48458047 | 48458047 | C | T | SNP | 0 0 | 0 1 | 34 1 | 2 10 |
| Chr10 | 48458419 | 48458419 | T | C | SNP | 0 0 | 0 1 | 51 2 | 5 9  |
| Chr10 | 48458616 | 48458616 | G | A | SNP | 0 0 | 0 1 | 46 1 | 6 14 |
| Chr10 | 48459040 | 48459040 | A | G | SNP | 0 0 | 0 1 | 42 0 | 5 14 |
| Chr10 | 48460027 | 48460027 | G | A | SNP | 0 1 | 0 1 | 41 4 | 9 12 |
| Chr10 | 48460266 | 48460266 | T | C | SNP | 0 0 | 0 1 | 41 3 | 9 13 |
| Chr10 | 48462915 | 48462915 | C | T | SNP | 0 0 | 0 1 | 57 2 | 4 21 |
| Chr10 | 48463777 | 48463777 | C | T | SNP | 0 0 | 0 1 | 38 0 | 4 10 |
| Chr10 | 48463921 | 48463921 | C | T | SNP | 0 0 | 0 1 | 30 1 | 3 9  |
| Chr10 | 48463984 | 48463984 | T | C | SNP | 0 0 | 0 1 | 25 1 | 1 7  |
| Chr10 | 48464140 | 48464140 | A | C | SNP | 0 0 | 0 1 | 25 1 | 4 6  |
| Chr10 | 48465319 | 48465319 | T | A | SNP | 0 0 | 0 1 | 68 2 | 5 11 |
| Chr10 | 48467024 | 48467024 | A | G | SNP | 0 1 | 0 1 | 40 5 | 7 8  |
| Chr10 | 48467123 | 48467123 | A | G | SNP | 0 1 | 0 1 | 57 6 | 3 6  |
| Chr10 | 48468755 | 48468755 | A | G | SNP | 0 0 | 0 1 | 18 0 | 1 7  |
| Chr10 | 48468907 | 48468907 | C | G | SNP | 0 0 | 0 1 | 25 1 | 1 7  |
| Chr10 | 48469020 | 48469020 | C | T | SNP | 0 0 | 0 1 | 28 2 | 5 14 |
| Chr10 | 48469148 | 48469148 | G | A | SNP | 0 0 | 1 1 | 55 1 | 0 17 |
| Chr10 | 48470244 | 48470244 | C | T | SNP | 0 0 | 1 1 | 23 0 | 0 13 |
| Chr10 | 48470492 | 48470492 | T | G | SNP | 0 0 | 1 1 | 24 0 | 0 9  |
| Chr10 | 48470795 | 48470795 | A | C | SNP | 0 0 | 0 1 | 28 1 | 5 12 |
| Chr10 | 48471485 | 48471485 | T | C | SNP | 0 0 | 0 1 | 53 2 | 5 17 |
| Chr10 | 48471532 | 48471532 | C | T | SNP | 0 0 | 0 1 | 49 2 | 6 16 |
| Chr10 | 48471676 | 48471676 | C | T | SNP | 0 0 | 0 1 | 50 2 | 4 17 |
| Chr10 | 48471683 | 48471683 | C | A | SNP | 0 0 | 0 1 | 51 2 | 4 17 |
| Chr10 | 48472140 | 48472140 | T | A | SNP | 0 0 | 0 1 | 30 0 | 5 13 |
| Chr10 | 48472413 | 48472413 | A | C | SNP | 0 0 | 0 1 | 44 5 | 5 7  |
| Chr10 | 48473100 | 48473100 | A | G | SNP | 0 0 | 0 1 | 42 0 | 2 7  |
| Chr10 | 48473496 | 48473496 | C | T | SNP | 0 0 | 0 1 | 54 1 | 2 13 |
| Chr10 | 48473597 | 48473597 | C | A | SNP | 0 0 | 0 1 | 47 2 | 5 6  |
| Chr10 | 48473598 | 48473598 | G | A | SNP | 0 0 | 0 1 | 46 2 | 5 6  |
| Chr10 | 48473658 | 48473658 | G | T | SNP | 0 0 | 0 1 | 52 2 | 7 5  |
| Chr10 | 48473829 | 48473829 | G | A | SNP | 0 0 | 0 1 | 37 1 | 6 5  |
| Chr10 | 48474197 | 48474197 | C | G | SNP | 0 1 | 0 1 | 36 6 | 3 13 |

|       |          |          |   |   |     |     |     |      |       |
|-------|----------|----------|---|---|-----|-----|-----|------|-------|
| Chr10 | 48474422 | 48474422 | C | A | SNP | 0 0 | 0 1 | 35 0 | 3 11  |
| Chr10 | 48474586 | 48474586 | A | G | SNP | 0 0 | 0 1 | 61 1 | 10 13 |
| Chr10 | 48475051 | 48475051 | C | T | SNP | 0 0 | 0 1 | 57 1 | 5 12  |
| Chr10 | 48478016 | 48478016 | T | G | SNP | 0 0 | 0 1 | 68 1 | 5 14  |
| Chr10 | 48478210 | 48478210 | A | G | SNP | 0 0 | 0 1 | 55 1 | 3 6   |
| Chr10 | 48478291 | 48478291 | A | G | SNP | 0 0 | 0 1 | 55 0 | 2 6   |
| Chr10 | 48478595 | 48478595 | C | T | SNP | 0 0 | 0 1 | 60 2 | 11 19 |
| Chr10 | 48478950 | 48478950 | G | T | SNP | 0 0 | 0 1 | 46 4 | 10 20 |
| Chr10 | 48479004 | 48479004 | T | C | SNP | 0 0 | 0 1 | 45 2 | 10 11 |
| Chr10 | 48479396 | 48479396 | A | G | SNP | 0 0 | 0 1 | 43 0 | 6 13  |
| Chr10 | 48480572 | 48480572 | T | C | SNP | 0 0 | 0 1 | 22 0 | 5 10  |
| Chr10 | 48481730 | 48481730 | C | A | SNP | 0 0 | 0 1 | 56 2 | 6 5   |
| Chr10 | 48482214 | 48482214 | C | T | SNP | 0 0 | 0 1 | 46 0 | 7 9   |
| Chr10 | 48482566 | 48482566 | A | G | SNP | 0 0 | 0 1 | 29 0 | 4 8   |
| Chr10 | 48484588 | 48484588 | A | G | SNP | 0 0 | 0 1 | 30 2 | 1 11  |
| Chr10 | 48484619 | 48484619 | G | A | SNP | 0 0 | 0 1 | 34 1 | 1 8   |
| Chr10 | 48484634 | 48484634 | G | A | SNP | 0 0 | 0 1 | 30 1 | 1 8   |
| Chr10 | 48484646 | 48484646 | G | T | SNP | 0 0 | 0 1 | 31 2 | 1 10  |
| Chr10 | 48485207 | 48485207 | G | T | SNP | 0 1 | 0 1 | 19 3 | 6 9   |
| Chr10 | 48485237 | 48485237 | A | G | SNP | 0 1 | 0 1 | 20 5 | 5 12  |
| Chr10 | 48485273 | 48485273 | A | G | SNP | 0 1 | 0 1 | 28 4 | 7 20  |
| Chr10 | 48486508 | 48486508 | G | A | SNP | 0 0 | 0 1 | 48 1 | 4 26  |
| Chr10 | 48486809 | 48486809 | C | G | SNP | 0 0 | 0 1 | 42 0 | 7 14  |
| Chr10 | 48486907 | 48486907 | G | T | SNP | 0 0 | 0 1 | 47 1 | 5 10  |
| Chr10 | 48487431 | 48487431 | G | T | SNP | 0 0 | 0 1 | 47 4 | 5 14  |
| Chr10 | 48488022 | 48488022 | A | G | SNP | 0 0 | 0 1 | 44 0 | 2 13  |
| Chr10 | 48488457 | 48488457 | C | T | SNP | 0 1 | 0 1 | 37 3 | 2 12  |
| Chr10 | 48488605 | 48488605 | A | T | SNP | 0 0 | 0 1 | 23 1 | 1 8   |
| Chr10 | 48490035 | 48490035 | T | G | SNP | 0 0 | 1 1 | 54 0 | 0 9   |
| Chr10 | 48490069 | 48490069 | T | A | SNP | 0 0 | 0 1 | 54 0 | 1 9   |
| Chr10 | 48490180 | 48490180 | A | G | SNP | 0 0 | 0 1 | 62 1 | 5 10  |
| Chr10 | 48490571 | 48490571 | T | C | SNP | 0 0 | 0 1 | 65 0 | 11 18 |
| Chr10 | 48490940 | 48490940 | G | C | SNP | 0 0 | 0 1 | 46 2 | 2 7   |
| Chr10 | 48491171 | 48491171 | T | C | SNP | 0 1 | 0 1 | 60 5 | 3 11  |
| Chr10 | 48491737 | 48491737 | C | A | SNP | 0 0 | 0 1 | 32 1 | 16 16 |
| Chr10 | 48491882 | 48491882 | T | C | SNP | 0 0 | 0 1 | 67 2 | 5 10  |
| Chr10 | 48494123 | 48494123 | G | A | SNP | 0 0 | 0 1 | 36 1 | 3 11  |
| Chr10 | 48494281 | 48494281 | A | G | SNP | 0 0 | 0 1 | 20 0 | 6 7   |
| Chr10 | 48494312 | 48494312 | C | A | SNP | 0 0 | 0 1 | 19 0 | 7 6   |
| Chr10 | 48495385 | 48495385 | G | A | SNP | 0 0 | 0 1 | 28 1 | 7 11  |
| Chr10 | 48495392 | 48495392 | T | A | SNP | 0 0 | 0 1 | 27 1 | 6 12  |
| Chr10 | 48495461 | 48495461 | G | A | SNP | 0 0 | 0 1 | 38 1 | 6 10  |

|       |          |          |   |   |     |     |     |      |       |
|-------|----------|----------|---|---|-----|-----|-----|------|-------|
| Chr10 | 48495722 | 48495722 | G | A | SNP | 0 0 | 0 1 | 58 1 | 6 21  |
| Chr10 | 48495813 | 48495813 | A | G | SNP | 0 0 | 0 1 | 64 1 | 3 17  |
| Chr10 | 48495838 | 48495838 | T | A | SNP | 0 0 | 0 1 | 63 1 | 3 23  |
| Chr10 | 48496101 | 48496101 | C | G | SNP | 0 0 | 0 1 | 57 0 | 4 29  |
| Chr10 | 48496166 | 48496166 | C | T | SNP | 0 0 | 0 1 | 55 0 | 3 26  |
| Chr10 | 48496276 | 48496276 | G | A | SNP | 0 0 | 0 1 | 48 3 | 4 12  |
| Chr10 | 48496417 | 48496417 | C | A | SNP | 0 0 | 0 1 | 50 4 | 7 8   |
| Chr10 | 48496613 | 48496613 | G | A | SNP | 0 0 | 0 1 | 47 3 | 5 17  |
| Chr10 | 48496765 | 48496765 | C | T | SNP | 0 0 | 0 1 | 61 3 | 7 15  |
| Chr10 | 48496995 | 48496995 | C | G | SNP | 0 0 | 0 1 | 68 1 | 8 13  |
| Chr10 | 48499076 | 48499076 | C | T | SNP | 0 0 | 0 1 | 56 1 | 8 21  |
| Chr10 | 48499476 | 48499476 | T | C | SNP | 0 0 | 0 1 | 52 0 | 6 8   |
| Chr10 | 48499565 | 48499565 | G | C | SNP | 0 0 | 0 1 | 65 1 | 8 18  |
| Chr10 | 48499673 | 48499673 | A | G | SNP | 0 0 | 0 1 | 68 1 | 3 29  |
| Chr10 | 48499894 | 48499894 | A | G | SNP | 0 0 | 0 1 | 51 1 | 10 6  |
| Chr10 | 48500401 | 48500401 | G | C | SNP | 0 1 | 0 1 | 31 6 | 8 6   |
| Chr10 | 48500530 | 48500530 | T | A | SNP | 0 0 | 0 1 | 10 0 | 1 8   |
| Chr10 | 48501510 | 48501510 | T | G | SNP | 0 0 | 0 1 | 24 1 | 1 9   |
| Chr10 | 48501945 | 48501945 | G | T | SNP | 0 0 | 0 1 | 28 2 | 4 8   |
| Chr10 | 48502008 | 48502008 | A | C | SNP | 0 0 | 0 1 | 34 2 | 4 9   |
| Chr10 | 48502278 | 48502278 | G | A | SNP | 0 0 | 1 1 | 35 2 | 0 8   |
| Chr10 | 48502393 | 48502393 | C | T | SNP | 0 1 | 0 1 | 28 4 | 3 15  |
| Chr10 | 48502457 | 48502457 | A | G | SNP | 0 0 | 0 1 | 39 2 | 3 19  |
| Chr10 | 48502722 | 48502722 | T | A | SNP | 0 0 | 0 1 | 39 0 | 5 17  |
| Chr10 | 48503156 | 48503156 | C | T | SNP | 1 1 | 0 1 | 1 60 | 17 10 |
| Chr10 | 48503335 | 48503335 | G | A | SNP | 0 0 | 0 1 | 50 0 | 10 15 |
| Chr10 | 48505000 | 48505000 | A | T | SNP | 0 0 | 0 1 | 39 1 | 2 7   |
| Chr10 | 48505073 | 48505073 | G | A | SNP | 0 0 | 0 1 | 36 2 | 4 8   |
| Chr10 | 48505132 | 48505132 | A | T | SNP | 0 0 | 0 1 | 27 1 | 6 6   |
| Chr10 | 48505294 | 48505294 | T | G | SNP | 0 1 | 0 1 | 25 7 | 7 5   |
| Chr10 | 48505456 | 48505456 | G | A | SNP | 0 0 | 0 1 | 24 0 | 4 10  |
| Chr10 | 48505506 | 48505506 | G | C | SNP | 0 0 | 0 1 | 32 1 | 4 8   |
| Chr10 | 48507744 | 48507744 | A | T | SNP | 0 0 | 0 1 | 59 0 | 4 18  |
| Chr10 | 48508070 | 48508070 | T | A | SNP | 0 0 | 0 1 | 53 1 | 4 10  |
| Chr10 | 48509147 | 48509147 | T | C | SNP | 0 0 | 0 1 | 51 1 | 11 18 |
| Chr10 | 48509637 | 48509637 | A | T | SNP | 0 1 | 0 1 | 21 2 | 4 14  |
| Chr10 | 48509684 | 48509684 | G | A | SNP | 0 0 | 0 1 | 16 1 | 3 7   |
| Chr10 | 48509753 | 48509753 | A | T | SNP | 0 1 | 0 1 | 11 1 | 2 8   |
| Chr10 | 48509781 | 48509781 | A | T | SNP | 0 0 | 0 1 | 12 0 | 3 9   |
| Chr10 | 48509857 | 48509857 | C | A | SNP | 0 0 | 0 1 | 19 0 | 3 12  |
| Chr10 | 48509930 | 48509930 | C | T | SNP | 0 0 | 0 1 | 16 1 | 1 8   |
| Chr10 | 48510457 | 48510457 | A | T | SNP | 0 0 | 0 1 | 13 0 | 1 8   |

|       |          |          |   |   |     |     |     |      |       |
|-------|----------|----------|---|---|-----|-----|-----|------|-------|
| Chr10 | 48511551 | 48511551 | A | G | SNP | 0 0 | 0 1 | 9 0  | 2 6   |
| Chr10 | 48511575 | 48511575 | C | A | SNP | 0 0 | 0 1 | 14 0 | 2 8   |
| Chr10 | 48511582 | 48511582 | A | T | SNP | 0 0 | 0 1 | 14 0 | 2 8   |
| Chr10 | 48511720 | 48511720 | T | A | SNP | 0 0 | 0 1 | 16 0 | 5 3   |
| Chr10 | 48511745 | 48511745 | A | G | SNP | 0 0 | 0 1 | 14 0 | 3 6   |
| Chr10 | 48511801 | 48511801 | C | T | SNP | 0 0 | 0 1 | 16 0 | 2 6   |
| Chr10 | 48520944 | 48520944 | C | G | SNP | 0 0 | 0 1 | 54 1 | 4 16  |
| Chr10 | 48524424 | 48524424 | T | C | SNP | 0 1 | 0 1 | 11 1 | 6 7   |
| Chr10 | 48524444 | 48524444 | A | G | SNP | 0 0 | 0 1 | 8 0  | 5 3   |
| Chr10 | 48525015 | 48525015 | A | G | SNP | 0 0 | 0 1 | 30 1 | 3 7   |
| Chr10 | 48525026 | 48525026 | G | A | SNP | 0 0 | 0 1 | 27 1 | 3 6   |
| Chr10 | 48525039 | 48525039 | G | C | SNP | 0 0 | 0 1 | 25 1 | 3 6   |
| Chr10 | 48526864 | 48526864 | A | C | SNP | 0 1 | 0 1 | 17 2 | 4 5   |
| Chr10 | 48527000 | 48527000 | T | C | SNP | 0 1 | 0 1 | 23 2 | 4 4   |
| Chr10 | 48527644 | 48527644 | C | T | SNP | 0 0 | 0 1 | 9 0  | 4 6   |
| Chr10 | 48528314 | 48528314 | T | C | SNP | 0 0 | 0 1 | 13 0 | 2 7   |
| Chr10 | 48528334 | 48528334 | G | C | SNP | 0 0 | 0 1 | 15 0 | 2 7   |
| Chr10 | 48529549 | 48529549 | G | C | SNP | 0 0 | 0 1 | 21 0 | 1 8   |
| Chr10 | 48529626 | 48529626 | A | C | SNP | 0 0 | 0 1 | 21 0 | 2 6   |
| Chr10 | 48529867 | 48529867 | A | G | SNP | 0 0 | 0 1 | 11 0 | 1 10  |
| Chr10 | 48531018 | 48531018 | A | T | SNP | 0 0 | 0 1 | 14 1 | 6 3   |
| Chr10 | 48532363 | 48532363 | A | C | SNP | 0 0 | 0 1 | 59 4 | 10 19 |
| Chr10 | 48534394 | 48534394 | T | C | SNP | 0 0 | 0 1 | 44 1 | 6 8   |
| Chr10 | 48534664 | 48534664 | A | T | SNP | 0 0 | 0 1 | 44 1 | 6 10  |
| Chr10 | 48535953 | 48535953 | G | T | SNP | 0 1 | 0 1 | 9 6  | 6 6   |
| Chr10 | 48535998 | 48535998 | A | G | SNP | 0 1 | 0 1 | 8 4  | 4 5   |
| Chr10 | 48538214 | 48538214 | A | G | SNP | 0 1 | 0 1 | 12 1 | 3 6   |
| Chr10 | 48538506 | 48538506 | A | G | SNP | 0 0 | 0 1 | 53 2 | 4 9   |
| Chr10 | 48538906 | 48538906 | C | G | SNP | 0 1 | 0 1 | 66 7 | 9 16  |
| Chr10 | 48539374 | 48539374 | T | C | SNP | 0 0 | 0 1 | 31 2 | 1 9   |
| Chr10 | 48539606 | 48539606 | C | T | SNP | 0 0 | 0 1 | 48 2 | 5 9   |
| Chr10 | 48539930 | 48539930 | T | A | SNP | 0 0 | 0 1 | 51 2 | 6 14  |
| Chr10 | 48540387 | 48540387 | A | G | SNP | 0 0 | 0 1 | 58 1 | 5 17  |
| Chr10 | 48540583 | 48540583 | G | A | SNP | 0 0 | 0 1 | 58 1 | 5 13  |
| Chr10 | 48541003 | 48541003 | C | A | SNP | 0 1 | 0 1 | 51 4 | 11 19 |
| Chr10 | 48541087 | 48541087 | C | T | SNP | 0 1 | 0 1 | 53 4 | 6 16  |
| Chr10 | 48541088 | 48541088 | A | T | SNP | 0 1 | 0 1 | 53 4 | 6 15  |
| Chr10 | 48541149 | 48541149 | C | A | SNP | 0 0 | 0 1 | 62 4 | 8 7   |
| Chr10 | 48541155 | 48541155 | C | A | SNP | 0 0 | 0 1 | 63 4 | 7 6   |
| Chr10 | 48542412 | 48542412 | T | G | SNP | 0 0 | 0 1 | 62 3 | 10 18 |
| Chr10 | 48542759 | 48542759 | T | A | SNP | 0 0 | 0 1 | 44 0 | 1 10  |
| Chr10 | 48542934 | 48542934 | C | A | SNP | 0 0 | 0 1 | 38 0 | 10 9  |

|       |          |          |   |   |     |     |     |      |       |
|-------|----------|----------|---|---|-----|-----|-----|------|-------|
| Chr10 | 48543055 | 48543055 | A | T | SNP | 0 0 | 0 1 | 48 3 | 6 10  |
| Chr10 | 48543168 | 48543168 | T | C | SNP | 0 0 | 0 1 | 59 1 | 8 14  |
| Chr10 | 48545212 | 48545212 | A | G | SNP | 0 1 | 0 1 | 27 3 | 1 8   |
| Chr10 | 48545250 | 48545250 | C | T | SNP | 0 1 | 0 1 | 27 5 | 4 10  |
| Chr10 | 48545296 | 48545296 | A | G | SNP | 0 1 | 0 1 | 37 5 | 7 9   |
| Chr10 | 48545426 | 48545426 | T | A | SNP | 0 0 | 0 1 | 34 1 | 6 12  |
| Chr10 | 48546907 | 48546907 | T | G | SNP | 0 0 | 0 1 | 43 3 | 8 8   |
| Chr10 | 48547482 | 48547482 | T | C | SNP | 0 1 | 0 1 | 12 2 | 3 5   |
| Chr10 | 48547506 | 48547506 | A | G | SNP | 0 1 | 0 1 | 16 2 | 3 5   |
| Chr10 | 48547858 | 48547858 | C | G | SNP | 0 0 | 0 1 | 14 1 | 3 9   |
| Chr10 | 48547944 | 48547944 | G | A | SNP | 0 1 | 0 1 | 32 3 | 3 9   |
| Chr10 | 48548107 | 48548107 | C | T | SNP | 0 0 | 0 1 | 42 0 | 5 5   |
| Chr10 | 48549239 | 48549239 | T | A | SNP | 0 1 | 0 1 | 15 4 | 6 4   |
| Chr10 | 48549240 | 48549240 | T | A | SNP | 0 1 | 0 1 | 15 4 | 6 4   |
| Chr10 | 48549257 | 48549257 | T | A | SNP | 0 1 | 0 1 | 12 4 | 5 3   |
| Chr10 | 48549302 | 48549302 | A | G | SNP | 0 1 | 0 1 | 8 5  | 5 3   |
| Chr10 | 48549378 | 48549378 | T | C | SNP | 0 1 | 0 1 | 10 2 | 2 7   |
| Chr10 | 48551211 | 48551211 | T | C | SNP | 0 0 | 0 1 | 30 2 | 6 13  |
| Chr10 | 48551502 | 48551502 | G | T | SNP | 0 1 | 0 1 | 32 3 | 4 11  |
| Chr10 | 48551531 | 48551531 | T | G | SNP | 0 1 | 0 1 | 32 3 | 4 7   |
| Chr10 | 48551669 | 48551669 | A | C | SNP | 0 1 | 0 1 | 31 6 | 10 9  |
| Chr10 | 48552047 | 48552047 | C | T | SNP | 0 0 | 0 1 | 55 2 | 3 19  |
| Chr10 | 48553874 | 48553874 | T | G | SNP | 0 0 | 0 1 | 32 2 | 6 15  |
| Chr10 | 48554855 | 48554855 | C | T | SNP | 0 1 | 0 1 | 53 6 | 4 15  |
| Chr10 | 48554867 | 48554867 | T | A | SNP | 0 1 | 0 1 | 54 5 | 4 18  |
| Chr10 | 48554982 | 48554982 | T | C | SNP | 0 1 | 0 1 | 43 6 | 3 10  |
| Chr10 | 48555498 | 48555498 | T | C | SNP | 0 1 | 0 1 | 42 5 | 3 24  |
| Chr10 | 48555669 | 48555669 | T | G | SNP | 0 0 | 1 1 | 57 4 | 0 20  |
| Chr10 | 48555796 | 48555796 | T | C | SNP | 0 0 | 0 1 | 51 0 | 3 23  |
| Chr10 | 48556422 | 48556422 | T | G | SNP | 0 0 | 0 1 | 29 4 | 6 8   |
| Chr10 | 48556874 | 48556874 | C | G | SNP | 0 1 | 0 1 | 19 2 | 5 9   |
| Chr10 | 48557012 | 48557012 | G | A | SNP | 0 0 | 0 1 | 31 3 | 9 8   |
| Chr10 | 48557992 | 48557992 | T | G | SNP | 0 0 | 0 1 | 47 2 | 9 18  |
| Chr10 | 48558227 | 48558227 | G | A | SNP | 0 1 | 0 1 | 37 3 | 10 9  |
| Chr10 | 48558263 | 48558263 | G | A | SNP | 0 1 | 0 1 | 45 4 | 13 11 |
| Chr10 | 48558264 | 48558264 | C | T | SNP | 0 1 | 0 1 | 45 4 | 13 10 |
| Chr10 | 48558887 | 48558887 | C | G | SNP | 0 0 | 0 1 | 58 3 | 5 11  |
| Chr10 | 48559301 | 48559301 | T | A | SNP | 0 0 | 0 1 | 47 3 | 11 9  |
| Chr10 | 48559507 | 48559507 | G | T | SNP | 0 0 | 0 1 | 39 2 | 4 5   |
| Chr10 | 48559521 | 48559521 | G | A | SNP | 0 0 | 0 1 | 42 2 | 4 4   |
| Chr10 | 48559712 | 48559712 | A | T | SNP | 0 0 | 0 1 | 25 0 | 2 18  |
| Chr10 | 48560007 | 48560007 | C | A | SNP | 0 1 | 0 1 | 35 5 | 7 9   |

|       |          |          |   |   |     |     |     |       |       |
|-------|----------|----------|---|---|-----|-----|-----|-------|-------|
| Chr10 | 48560412 | 48560412 | A | G | SNP | 0 0 | 0 1 | 29 1  | 3 11  |
| Chr10 | 48560462 | 48560462 | C | T | SNP | 0 0 | 0 1 | 37 0  | 3 10  |
| Chr10 | 48560807 | 48560807 | T | C | SNP | 0 1 | 0 1 | 22 2  | 4 7   |
| Chr10 | 48561041 | 48561041 | A | G | SNP | 0 0 | 0 1 | 19 0  | 4 4   |
| Chr10 | 48561152 | 48561152 | C | T | SNP | 0 0 | 0 1 | 33 1  | 3 5   |
| Chr10 | 48561158 | 48561158 | C | T | SNP | 0 0 | 0 1 | 33 1  | 3 5   |
| Chr10 | 48561181 | 48561181 | G | T | SNP | 0 0 | 0 1 | 42 1  | 2 6   |
| Chr10 | 48561463 | 48561463 | C | A | SNP | 0 1 | 1 1 | 37 3  | 0 10  |
| Chr10 | 48561514 | 48561514 | A | T | SNP | 0 1 | 1 1 | 38 11 | 0 13  |
| Chr10 | 48561563 | 48561563 | G | T | SNP | 0 1 | 1 1 | 38 8  | 0 12  |
| Chr10 | 48562471 | 48562471 | T | C | SNP | 0 0 | 1 1 | 28 1  | 0 16  |
| Chr10 | 48562747 | 48562747 | G | A | SNP | 0 0 | 0 1 | 31 1  | 1 7   |
| Chr10 | 48564401 | 48564401 | A | G | SNP | 0 1 | 0 1 | 19 2  | 3 6   |
| Chr10 | 48564575 | 48564575 | C | T | SNP | 0 0 | 0 1 | 60 0  | 4 8   |
| Chr10 | 48564613 | 48564613 | T | C | SNP | 0 0 | 0 1 | 72 1  | 8 13  |
| Chr10 | 48565010 | 48565010 | A | G | SNP | 0 0 | 0 1 | 49 5  | 10 7  |
| Chr10 | 48565688 | 48565688 | C | T | SNP | 0 0 | 0 1 | 55 1  | 6 14  |
| Chr10 | 48565824 | 48565824 | T | C | SNP | 0 0 | 0 1 | 40 2  | 11 12 |
| Chr10 | 48566023 | 48566023 | G | A | SNP | 0 0 | 0 1 | 33 1  | 8 8   |
| Chr10 | 48566337 | 48566337 | T | A | SNP | 0 1 | 0 1 | 46 4  | 3 5   |
| Chr10 | 48567444 | 48567444 | C | T | SNP | 0 0 | 0 1 | 40 2  | 9 12  |
| Chr10 | 48567762 | 48567762 | A | T | SNP | 0 1 | 0 1 | 42 4  | 5 12  |
| Chr10 | 48568852 | 48568852 | C | G | SNP | 0 0 | 0 1 | 46 1  | 7 13  |
| Chr10 | 48569085 | 48569085 | A | C | SNP | 0 1 | 0 1 | 55 9  | 5 11  |
| Chr10 | 48574224 | 48574224 | G | A | SNP | 0 1 | 0 1 | 52 5  | 3 16  |
| Chr10 | 48574326 | 48574326 | G | T | SNP | 0 0 | 0 1 | 57 4  | 3 15  |
| Chr10 | 48574545 | 48574545 | A | T | SNP | 0 1 | 0 1 | 55 4  | 2 6   |
| Chr10 | 48574617 | 48574617 | G | A | SNP | 0 1 | 0 1 | 58 5  | 6 8   |
| Chr10 | 48574651 | 48574651 | C | T | SNP | 0 1 | 0 1 | 58 5  | 5 8   |
| Chr10 | 48574653 | 48574653 | A | T | SNP | 0 1 | 0 1 | 58 5  | 5 8   |
| Chr10 | 48574664 | 48574664 | A | T | SNP | 0 0 | 0 1 | 58 4  | 5 7   |
| Chr10 | 48574707 | 48574707 | C | T | SNP | 0 1 | 0 1 | 66 7  | 5 7   |
| Chr10 | 48574795 | 48574795 | A | G | SNP | 0 1 | 0 1 | 75 11 | 5 11  |
| Chr10 | 48574932 | 48574932 | G | T | SNP | 0 0 | 0 1 | 43 1  | 7 23  |
| Chr10 | 48575078 | 48575078 | G | A | SNP | 0 0 | 0 1 | 71 4  | 6 22  |
| Chr10 | 48575326 | 48575326 | G | A | SNP | 0 1 | 0 1 | 56 8  | 5 19  |
| Chr10 | 48575724 | 48575724 | T | C | SNP | 0 1 | 0 1 | 46 5  | 10 6  |
| Chr10 | 48575926 | 48575926 | T | A | SNP | 0 0 | 0 1 | 43 2  | 4 9   |
| Chr10 | 48576106 | 48576106 | A | T | SNP | 0 1 | 0 1 | 41 4  | 4 8   |
| Chr10 | 48576256 | 48576256 | C | A | SNP | 0 0 | 0 1 | 24 1  | 1 8   |
| Chr10 | 48576647 | 48576647 | A | G | SNP | 0 1 | 0 1 | 36 4  | 2 7   |
| Chr10 | 48577965 | 48577965 | G | A | SNP | 0 0 | 0 1 | 31 2  | 4 7   |

|       |          |          |   |   |     |     |     |       |       |
|-------|----------|----------|---|---|-----|-----|-----|-------|-------|
| Chr10 | 48578239 | 48578239 | G | A | SNP | 0 0 | 0 1 | 45 3  | 3 12  |
| Chr10 | 48578329 | 48578329 | C | A | SNP | 0 0 | 0 1 | 45 2  | 3 8   |
| Chr10 | 48578340 | 48578340 | C | A | SNP | 0 0 | 0 1 | 45 2  | 3 8   |
| Chr10 | 48578373 | 48578373 | A | G | SNP | 0 0 | 0 1 | 48 2  | 6 9   |
| Chr10 | 48578418 | 48578418 | C | T | SNP | 0 0 | 0 1 | 49 3  | 4 13  |
| Chr10 | 48578469 | 48578469 | T | A | SNP | 0 0 | 0 1 | 45 2  | 5 18  |
| Chr10 | 48578503 | 48578503 | T | C | SNP | 0 0 | 0 1 | 44 3  | 3 17  |
| Chr10 | 48578650 | 48578650 | G | A | SNP | 0 0 | 0 1 | 47 1  | 6 5   |
| Chr10 | 48578695 | 48578695 | T | C | SNP | 0 0 | 0 1 | 44 0  | 9 10  |
| Chr10 | 48578957 | 48578957 | A | T | SNP | 0 1 | 0 1 | 40 11 | 5 16  |
| Chr10 | 48579095 | 48579095 | A | G | SNP | 0 1 | 0 1 | 58 7  | 6 14  |
| Chr10 | 48579207 | 48579207 | T | C | SNP | 0 1 | 0 1 | 43 11 | 6 20  |
| Chr10 | 48579484 | 48579484 | A | G | SNP | 0 0 | 0 1 | 46 0  | 16 15 |
| Chr10 | 48579547 | 48579547 | T | A | SNP | 0 0 | 0 1 | 44 1  | 10 9  |
| Chr10 | 48579548 | 48579548 | T | A | SNP | 0 0 | 0 1 | 44 1  | 10 9  |
| Chr10 | 48579584 | 48579584 | G | A | SNP | 0 0 | 0 1 | 46 0  | 7 8   |
| Chr10 | 48579688 | 48579688 | A | C | SNP | 0 0 | 0 1 | 64 2  | 2 20  |
| Chr10 | 48580671 | 48580671 | G | C | SNP | 0 0 | 0 1 | 9 0   | 3 5   |
| Chr10 | 48580737 | 48580737 | G | A | SNP | 0 0 | 0 1 | 15 0  | 4 5   |
| Chr10 | 48580740 | 48580740 | A | G | SNP | 0 0 | 0 1 | 13 0  | 4 5   |
| Chr10 | 48580744 | 48580744 | G | C | SNP | 0 0 | 0 1 | 13 0  | 4 5   |
| Chr10 | 48580750 | 48580750 | T | G | SNP | 0 0 | 0 1 | 11 0  | 5 7   |
| Chr10 | 48580765 | 48580765 | G | A | SNP | 0 0 | 0 1 | 13 0  | 4 7   |
| Chr10 | 48580781 | 48580781 | G | T | SNP | 0 0 | 0 1 | 17 0  | 4 7   |
| Chr10 | 48580784 | 48580784 | A | C | SNP | 0 0 | 0 1 | 17 0  | 4 7   |
| Chr10 | 48580785 | 48580785 | C | T | SNP | 0 0 | 0 1 | 17 0  | 4 7   |
| Chr10 | 48580879 | 48580879 | C | T | SNP | 0 0 | 0 1 | 14 0  | 1 7   |
| Chr10 | 48582698 | 48582698 | C | G | SNP | 0 0 | 0 1 | 25 0  | 2 10  |
| Chr10 | 48582701 | 48582701 | C | T | SNP | 0 0 | 0 1 | 25 0  | 2 11  |
| Chr10 | 48582757 | 48582757 | A | G | SNP | 0 0 | 0 1 | 39 1  | 3 18  |
| Chr10 | 48582759 | 48582759 | A | G | SNP | 0 0 | 0 1 | 38 1  | 3 19  |
| Chr10 | 48582818 | 48582818 | G | A | SNP | 0 0 | 0 1 | 50 2  | 7 20  |
| Chr10 | 48582873 | 48582873 | T | C | SNP | 0 0 | 0 1 | 49 1  | 7 12  |
| Chr10 | 48582902 | 48582902 | T | A | SNP | 0 0 | 0 1 | 33 1  | 6 13  |
| Chr10 | 48582926 | 48582926 | T | A | SNP | 0 0 | 0 1 | 29 1  | 6 13  |
| Chr10 | 48582930 | 48582930 | G | C | SNP | 0 0 | 0 1 | 29 1  | 6 13  |
| Chr10 | 48582940 | 48582940 | C | T | SNP | 0 0 | 0 1 | 30 1  | 2 14  |
| Chr10 | 48583021 | 48583021 | C | T | SNP | 0 0 | 0 1 | 33 1  | 1 13  |
| Chr10 | 48584004 | 48584004 | C | T | SNP | 0 0 | 0 1 | 30 1  | 5 11  |
| Chr10 | 48584173 | 48584173 | A | G | SNP | 0 0 | 1 1 | 41 1  | 1 17  |
| Chr10 | 48585133 | 48585133 | A | G | SNP | 0 1 | 0 1 | 37 4  | 4 4   |
| Chr10 | 48585651 | 48585651 | T | A | SNP | 0 1 | 0 1 | 32 6  | 5 14  |

|       |          |          |   |   |     |     |     |      |       |
|-------|----------|----------|---|---|-----|-----|-----|------|-------|
| Chr10 | 48585791 | 48585791 | G | A | SNP | 0 1 | 0 1 | 31 8 | 3 14  |
| Chr10 | 48586356 | 48586356 | C | T | SNP | 0 1 | 0 1 | 30 9 | 6 20  |
| Chr10 | 48586491 | 48586491 | A | G | SNP | 0 1 | 0 1 | 29 3 | 3 8   |
| Chr10 | 48587139 | 48587139 | T | G | SNP | 0 0 | 0 1 | 46 4 | 5 21  |
| Chr10 | 48587654 | 48587654 | T | A | SNP | 0 0 | 0 1 | 45 1 | 5 12  |
| Chr10 | 48587704 | 48587704 | A | T | SNP | 0 0 | 0 1 | 44 2 | 5 13  |
| Chr10 | 48589382 | 48589382 | T | C | SNP | 0 0 | 0 1 | 32 2 | 4 6   |
| Chr10 | 48589700 | 48589700 | T | C | SNP | 0 1 | 0 1 | 51 6 | 4 10  |
| Chr10 | 48589747 | 48589747 | A | G | SNP | 0 0 | 0 1 | 59 3 | 3 10  |
| Chr10 | 48589835 | 48589835 | G | T | SNP | 0 1 | 0 1 | 59 8 | 1 15  |
| Chr10 | 48590007 | 48590007 | T | C | SNP | 0 0 | 0 1 | 70 4 | 5 22  |
| Chr10 | 48590347 | 48590347 | C | A | SNP | 0 1 | 0 1 | 66 6 | 3 17  |
| Chr10 | 48590800 | 48590800 | A | G | SNP | 0 0 | 0 1 | 38 1 | 7 12  |
| Chr10 | 48591636 | 48591636 | C | G | SNP | 0 0 | 0 1 | 54 1 | 3 8   |
| Chr10 | 48591680 | 48591680 | A | G | SNP | 0 1 | 0 1 | 53 4 | 5 7   |
| Chr10 | 48591874 | 48591874 | C | T | SNP | 0 0 | 0 1 | 63 5 | 6 18  |
| Chr10 | 48592005 | 48592005 | C | A | SNP | 0 0 | 0 1 | 65 2 | 9 19  |
| Chr10 | 48592116 | 48592116 | G | A | SNP | 0 0 | 0 1 | 48 2 | 6 9   |
| Chr10 | 48592311 | 48592311 | C | T | SNP | 0 1 | 0 1 | 51 5 | 7 28  |
| Chr10 | 48592799 | 48592799 | G | C | SNP | 0 0 | 0 1 | 41 1 | 13 7  |
| Chr10 | 48593398 | 48593398 | C | T | SNP | 0 0 | 1 1 | 32 1 | 1 15  |
| Chr10 | 48594388 | 48594388 | T | C | SNP | 0 0 | 0 1 | 60 2 | 7 16  |
| Chr10 | 48594479 | 48594479 | G | A | SNP | 0 0 | 0 1 | 59 3 | 12 17 |
| Chr10 | 48595049 | 48595049 | T | A | SNP | 0 0 | 0 1 | 48 4 | 4 14  |
| Chr10 | 48596313 | 48596313 | A | G | SNP | 0 0 | 0 1 | 48 3 | 9 13  |
| Chr10 | 48596630 | 48596630 | T | G | SNP | 0 0 | 0 1 | 51 2 | 6 8   |
| Chr10 | 48596702 | 48596702 | T | C | SNP | 0 0 | 0 1 | 65 3 | 3 9   |
| Chr10 | 48596870 | 48596870 | G | A | SNP | 0 1 | 0 1 | 35 5 | 12 9  |
| Chr10 | 48597791 | 48597791 | T | C | SNP | 0 0 | 0 1 | 47 2 | 14 14 |
| Chr10 | 48597793 | 48597793 | A | G | SNP | 0 0 | 0 1 | 48 2 | 14 14 |
| Chr10 | 48598942 | 48598942 | G | T | SNP | 0 1 | 0 1 | 37 8 | 7 19  |
| Chr10 | 48599387 | 48599387 | G | A | SNP | 0 0 | 0 1 | 47 0 | 4 8   |
| Chr10 | 48599633 | 48599633 | G | A | SNP | 0 0 | 0 1 | 36 1 | 8 22  |
| Chr10 | 48599694 | 48599694 | A | T | SNP | 0 0 | 0 1 | 42 2 | 9 12  |
| Chr10 | 48599733 | 48599733 | C | G | SNP | 0 0 | 0 1 | 50 3 | 5 14  |
| Chr10 | 48600639 | 48600639 | T | C | SNP | 0 0 | 0 1 | 42 3 | 3 15  |
| Chr10 | 48601471 | 48601471 | C | G | SNP | 0 0 | 0 1 | 24 2 | 9 9   |
| Chr10 | 48602232 | 48602232 | C | G | SNP | 0 0 | 0 1 | 52 2 | 4 11  |
| Chr10 | 48602388 | 48602388 | G | A | SNP | 0 0 | 0 1 | 34 3 | 4 11  |
| Chr10 | 48603758 | 48603758 | C | G | SNP | 0 1 | 0 1 | 44 5 | 9 18  |
| Chr10 | 48604811 | 48604811 | T | G | SNP | 0 1 | 0 1 | 44 8 | 7 13  |
| Chr10 | 48607157 | 48607157 | T | G | SNP | 0 1 | 0 1 | 25 3 | 4 8   |



|       |          |          |   |   |     |     |     |       |       |
|-------|----------|----------|---|---|-----|-----|-----|-------|-------|
| Chr10 | 48608052 | 48608052 | C | T | SNP | 0 0 | 0 1 | 400   | 6 10  |
| Chr10 | 48608110 | 48608110 | A | T | SNP | 0 0 | 0 1 | 51 0  | 8 10  |
| Chr10 | 48608322 | 48608322 | T | A | SNP | 0 1 | 0 1 | 63 8  | 4 20  |
| Chr10 | 48608746 | 48608746 | A | G | SNP | 0 0 | 0 1 | 57 2  | 7 6   |
| Chr10 | 48609669 | 48609669 | G | T | SNP | 0 0 | 0 1 | 26 1  | 3 8   |
| Chr10 | 48611372 | 48611372 | G | A | SNP | 0 1 | 0 1 | 35 5  | 11 6  |
| Chr10 | 48611376 | 48611376 | G | A | SNP | 0 1 | 0 1 | 37 5  | 11 6  |
| Chr10 | 48612161 | 48612161 | G | A | SNP | 0 1 | 0 1 | 46 4  | 6 19  |
| Chr10 | 48612934 | 48612934 | T | A | SNP | 0 1 | 0 1 | 33 14 | 3 16  |
| Chr10 | 48612992 | 48612992 | T | C | SNP | 0 1 | 0 1 | 33 10 | 4 10  |
| Chr10 | 48613175 | 48613175 | T | A | SNP | 0 1 | 0 1 | 13 4  | 5 5   |
| Chr10 | 48613389 | 48613389 | A | G | SNP | 0 0 | 0 1 | 49 3  | 4 11  |
| Chr10 | 48613841 | 48613841 | T | C | SNP | 0 0 | 0 1 | 12 0  | 5 4   |
| Chr10 | 48614628 | 48614628 | A | G | SNP | 0 0 | 0 1 | 21 1  | 7 3   |
| Chr10 | 48614722 | 48614722 | G | A | SNP | 0 1 | 0 1 | 27 2  | 5 5   |
| Chr10 | 48614760 | 48614760 | T | C | SNP | 0 0 | 0 1 | 18 1  | 5 4   |
| Chr10 | 48615726 | 48615726 | G | T | SNP | 0 0 | 0 1 | 25 1  | 3 7   |
| Chr10 | 48615727 | 48615727 | T | G | SNP | 0 0 | 0 1 | 25 1  | 3 7   |
| Chr10 | 48615748 | 48615748 | G | A | SNP | 0 1 | 0 1 | 25 2  | 4 13  |
| Chr10 | 48615972 | 48615972 | C | G | SNP | 0 1 | 0 1 | 27 10 | 8 11  |
| Chr10 | 48617466 | 48617466 | A | G | SNP | 0 0 | 0 1 | 55 1  | 9 20  |
| Chr10 | 48617483 | 48617483 | G | A | SNP | 0 0 | 0 1 | 51 3  | 9 17  |
| Chr10 | 48618756 | 48618756 | A | G | SNP | 0 0 | 0 1 | 49 2  | 10 19 |
| Chr10 | 48620860 | 48620860 | C | T | SNP | 0 0 | 1 1 | 36 2  | 0 8   |
| Chr10 | 48621413 | 48621413 | G | C | SNP | 0 0 | 0 1 | 39 2  | 5 4   |
| Chr10 | 48625708 | 48625708 | A | C | SNP | 0 1 | 0 1 | 8 3   | 1 7   |
| Chr10 | 48625915 | 48625915 | G | A | SNP | 0 0 | 0 1 | 26 1  | 1 8   |
| Chr10 | 48626126 | 48626126 | T | A | SNP | 0 0 | 0 1 | 32 0  | 6 13  |
| Chr10 | 48626139 | 48626139 | G | A | SNP | 0 0 | 0 1 | 39 0  | 6 11  |
| Chr10 | 48626281 | 48626281 | G | A | SNP | 0 1 | 0 1 | 53 4  | 3 6   |
| Chr10 | 48626597 | 48626597 | A | G | SNP | 0 1 | 0 1 | 58 7  | 6 14  |
| Chr10 | 48626642 | 48626642 | C | A | SNP | 0 1 | 0 1 | 56 9  | 6 13  |
| Chr10 | 48627186 | 48627186 | G | C | SNP | 0 0 | 0 1 | 77 4  | 14 11 |
| Chr10 | 48627656 | 48627656 | T | G | SNP | 0 0 | 0 1 | 82 1  | 5 14  |
| Chr10 | 48627850 | 48627850 | C | G | SNP | 0 0 | 0 1 | 68 3  | 10 9  |
| Chr10 | 48627986 | 48627986 | A | T | SNP | 0 0 | 0 1 | 53 1  | 7 18  |
| Chr10 | 48630786 | 48630786 | C | A | SNP | 0 0 | 0 1 | 44 2  | 6 8   |
| Chr10 | 48630826 | 48630826 | T | C | SNP | 0 0 | 0 1 | 42 2  | 6 10  |
| Chr10 | 48630884 | 48630884 | C | G | SNP | 0 1 | 0 1 | 38 4  | 8 13  |
| Chr10 | 48631055 | 48631055 | G | A | SNP | 0 1 | 0 1 | 25 5  | 7 9   |
| Chr10 | 48631108 | 48631108 | A | C | SNP | 0 1 | 0 1 | 14 5  | 7 9   |
| Chr10 | 48631115 | 48631115 | A | G | SNP | 0 1 | 0 1 | 14 5  | 7 9   |

|       |          |          |   |   |     |     |     |       |      |
|-------|----------|----------|---|---|-----|-----|-----|-------|------|
| Chr10 | 48631178 | 48631178 | C | A | SNP | 0 1 | 0 1 | 9 2   | 3 16 |
| Chr10 | 48631222 | 48631222 | T | A | SNP | 0 0 | 0 1 | 14 1  | 2 17 |
| Chr10 | 48631250 | 48631250 | A | G | SNP | 0 0 | 0 1 | 21 1  | 2 21 |
| Chr10 | 48631298 | 48631298 | A | T | SNP | 0 0 | 0 1 | 29 1  | 4 25 |
| Chr10 | 48632123 | 48632123 | G | C | SNP | 0 0 | 0 1 | 21 1  | 3 7  |
| Chr10 | 48632719 | 48632719 | T | A | SNP | 0 0 | 0 1 | 11 0  | 5 9  |
| Chr10 | 48632724 | 48632724 | T | A | SNP | 0 0 | 0 1 | 11 0  | 5 9  |
| Chr10 | 48632792 | 48632792 | G | T | SNP | 0 0 | 0 1 | 30 2  | 5 9  |
| Chr10 | 48633172 | 48633172 | G | A | SNP | 0 0 | 0 1 | 65 2  | 4 16 |
| Chr10 | 48633195 | 48633195 | G | T | SNP | 0 0 | 0 1 | 68 2  | 6 19 |
| Chr10 | 48633563 | 48633563 | A | C | SNP | 0 1 | 0 1 | 63 11 | 8 18 |
| Chr10 | 48635242 | 48635242 | T | G | SNP | 0 1 | 0 1 | 25 2  | 5 9  |
| Chr10 | 48635278 | 48635278 | C | T | SNP | 0 0 | 0 1 | 39 2  | 5 11 |
| Chr10 | 48635309 | 48635309 | A | G | SNP | 0 0 | 0 1 | 46 2  | 7 8  |
| Chr10 | 48635357 | 48635357 | A | T | SNP | 0 0 | 0 1 | 48 2  | 7 5  |
| Chr10 | 48639271 | 48639271 | G | A | SNP | 0 1 | 0 1 | 22 3  | 2 9  |
| Chr10 | 48639422 | 48639422 | A | G | SNP | 0 0 | 0 1 | 22 1  | 4 12 |
| Chr10 | 48639491 | 48639491 | G | A | SNP | 0 0 | 0 1 | 38 0  | 4 10 |
| Chr10 | 48640916 | 48640916 | A | T | SNP | 0 1 | 0 1 | 10 1  | 9 11 |
| Chr10 | 48645454 | 48645454 | G | A | SNP | 0 1 | 0 1 | 55 6  | 6 12 |
| Chr10 | 48645712 | 48645712 | A | T | SNP | 0 0 | 0 1 | 55 4  | 8 19 |
| Chr10 | 48645727 | 48645727 | A | G | SNP | 0 1 | 0 1 | 54 4  | 8 16 |
| Chr10 | 48645738 | 48645738 | C | T | SNP | 0 1 | 0 1 | 50 4  | 5 16 |
| Chr10 | 48648165 | 48648165 | C | A | SNP | 0 1 | 0 1 | 22 2  | 5 3  |
| Chr10 | 48648176 | 48648176 | G | C | SNP | 0 1 | 0 1 | 22 2  | 5 3  |
| Chr10 | 48648644 | 48648644 | G | A | SNP | 0 1 | 0 1 | 12 1  | 2 8  |
| Chr10 | 48648675 | 48648675 | G | T | SNP | 0 1 | 0 1 | 18 3  | 2 9  |
| Chr10 | 48649072 | 48649072 | G | T | SNP | 0 0 | 0 1 | 47 1  | 5 10 |
| Chr10 | 48649089 | 48649089 | T | A | SNP | 0 0 | 0 1 | 44 1  | 6 10 |
| Chr10 | 48649271 | 48649271 | G | A | SNP | 0 0 | 0 1 | 54 2  | 4 6  |
| Chr10 | 48649395 | 48649395 | A | G | SNP | 0 1 | 0 1 | 65 9  | 7 17 |
| Chr10 | 48649520 | 48649520 | A | T | SNP | 0 0 | 0 1 | 66 4  | 8 15 |
| Chr10 | 48649547 | 48649547 | C | A | SNP | 0 0 | 0 1 | 69 3  | 7 12 |
| Chr10 | 48649555 | 48649555 | G | A | SNP | 0 0 | 0 1 | 68 3  | 7 14 |
| Chr10 | 48649689 | 48649689 | C | T | SNP | 0 1 | 0 1 | 42 4  | 4 15 |
| Chr10 | 48649818 | 48649818 | T | G | SNP | 0 0 | 0 1 | 42 1  | 3 12 |
| Chr10 | 48649822 | 48649822 | G | A | SNP | 0 0 | 0 1 | 42 1  | 3 12 |
| Chr10 | 48650202 | 48650202 | T | C | SNP | 0 1 | 0 1 | 9 2   | 4 8  |
| Chr10 | 48650428 | 48650428 | G | T | SNP | 0 0 | 0 1 | 24 0  | 4 4  |
| Chr10 | 48650429 | 48650429 | T | A | SNP | 0 0 | 0 1 | 24 0  | 4 4  |
| Chr10 | 48650521 | 48650521 | G | C | SNP | 0 1 | 0 1 | 35 4  | 5 10 |
| Chr10 | 48650533 | 48650533 | A | C | SNP | 0 1 | 0 1 | 33 4  | 6 10 |

|       |          |          |   |   |     |     |     |      |      |
|-------|----------|----------|---|---|-----|-----|-----|------|------|
| Chr10 | 48650663 | 48650663 | G | T | SNP | 0 0 | 0 1 | 42 2 | 2 16 |
| Chr10 | 48651316 | 48651316 | T | A | SNP | 0 1 | 1 1 | 39 8 | 1 15 |
| Chr10 | 48651366 | 48651366 | G | A | SNP | 0 1 | 1 1 | 57 6 | 1 17 |
| Chr10 | 48651400 | 48651400 | G | A | SNP | 0 0 | 0 1 | 56 4 | 1 13 |
| Chr10 | 48651711 | 48651711 | C | T | SNP | 0 0 | 0 1 | 35 1 | 6 19 |
| Chr10 | 48652791 | 48652791 | T | A | SNP | 0 1 | 0 1 | 33 5 | 5 6  |
| Chr10 | 48652793 | 48652793 | T | A | SNP | 0 1 | 0 1 | 34 5 | 7 7  |
| Chr10 | 48653165 | 48653165 | C | G | SNP | 0 0 | 0 1 | 75 3 | 3 15 |
| Chr10 | 48653465 | 48653465 | G | C | SNP | 0 0 | 0 1 | 63 1 | 5 21 |
| Chr10 | 48655879 | 48655879 | C | A | SNP | 0 1 | 0 1 | 33 4 | 5 3  |
| Chr10 | 48656994 | 48656994 | A | C | SNP | 0 1 | 0 1 | 57 5 | 4 10 |
| Chr10 | 48657030 | 48657030 | T | C | SNP | 0 1 | 0 1 | 50 5 | 2 8  |
| Chr10 | 48657366 | 48657366 | G | A | SNP | 0 1 | 0 1 | 43 4 | 4 9  |
| Chr10 | 48657537 | 48657537 | A | G | SNP | 0 1 | 0 1 | 25 6 | 2 7  |
| Chr10 | 48657753 | 48657753 | T | C | SNP | 0 1 | 0 1 | 19 4 | 6 9  |
| Chr10 | 48657833 | 48657833 | G | A | SNP | 0 1 | 0 1 | 16 3 | 4 5  |
| Chr10 | 48657880 | 48657880 | T | C | SNP | 0 1 | 0 1 | 22 3 | 5 9  |
| Chr10 | 48658012 | 48658012 | A | G | SNP | 0 1 | 0 1 | 39 5 | 3 9  |
| Chr10 | 48658134 | 48658134 | A | T | SNP | 0 1 | 0 1 | 23 2 | 4 5  |
| Chr10 | 48658356 | 48658356 | A | G | SNP | 0 1 | 0 1 | 38 6 | 2 8  |
| Chr10 | 48658416 | 48658416 | A | G | SNP | 0 1 | 0 1 | 42 7 | 2 6  |
| Chr10 | 48658440 | 48658440 | G | A | SNP | 0 1 | 0 1 | 36 4 | 2 6  |
| Chr10 | 48658463 | 48658463 | G | T | SNP | 0 1 | 0 1 | 36 2 | 3 7  |
| Chr10 | 48658487 | 48658487 | G | T | SNP | 0 0 | 0 1 | 42 2 | 8 7  |
| Chr10 | 48658502 | 48658502 | G | T | SNP | 0 0 | 0 1 | 42 2 | 7 6  |
| Chr10 | 48658624 | 48658624 | A | T | SNP | 0 0 | 0 1 | 59 1 | 7 8  |
| Chr10 | 48658751 | 48658751 | A | T | SNP | 0 0 | 0 1 | 28 0 | 7 10 |
| Chr10 | 48658819 | 48658819 | G | A | SNP | 0 0 | 0 1 | 44 2 | 5 6  |
| Chr10 | 48658941 | 48658941 | C | T | SNP | 0 0 | 0 1 | 51 0 | 5 13 |
| Chr10 | 48658942 | 48658942 | C | T | SNP | 0 0 | 0 1 | 51 0 | 5 13 |
| Chr10 | 48659145 | 48659145 | T | A | SNP | 0 1 | 0 1 | 52 7 | 4 17 |
| Chr10 | 48659278 | 48659278 | C | G | SNP | 0 1 | 0 1 | 42 4 | 7 13 |
| Chr10 | 48660182 | 48660182 | T | C | SNP | 0 0 | 0 1 | 30 1 | 4 4  |
| Chr10 | 48660218 | 48660218 | G | C | SNP | 0 0 | 0 1 | 25 1 | 6 4  |
| Chr10 | 48660578 | 48660578 | C | A | SNP | 0 0 | 0 1 | 78 3 | 5 13 |
| Chr10 | 48661165 | 48661165 | G | A | SNP | 0 1 | 0 1 | 34 3 | 1 10 |
| Chr10 | 48661174 | 48661174 | T | G | SNP | 0 1 | 0 1 | 33 5 | 1 8  |
| Chr10 | 48661495 | 48661495 | A | G | SNP | 0 1 | 0 1 | 9 7  | 3 5  |
| Chr10 | 48661502 | 48661502 | T | G | SNP | 0 1 | 0 1 | 9 7  | 3 5  |
| Chr10 | 48661551 | 48661551 | C | T | SNP | 0 1 | 0 1 | 12 5 | 3 8  |
| Chr10 | 48661757 | 48661757 | C | T | SNP | 0 1 | 0 1 | 29 3 | 3 6  |
| Chr10 | 48662263 | 48662263 | T | A | SNP | 0 0 | 0 1 | 29 2 | 3 8  |

|       |          |          |   |   |     |     |     |      |       |
|-------|----------|----------|---|---|-----|-----|-----|------|-------|
| Chr10 | 48662349 | 48662349 | C | G | SNP | 0 0 | 0 1 | 31 2 | 2 14  |
| Chr10 | 48663163 | 48663163 | T | G | SNP | 0 0 | 0 1 | 13 0 | 3 9   |
| Chr10 | 48663958 | 48663958 | G | A | SNP | 0 0 | 0 1 | 34 2 | 2 7   |
| Chr10 | 48664241 | 48664241 | A | G | SNP | 0 0 | 0 1 | 13 0 | 5 4   |
| Chr10 | 48664990 | 48664990 | C | T | SNP | 0 1 | 0 1 | 18 3 | 5 8   |
| Chr10 | 48665232 | 48665232 | C | T | SNP | 0 0 | 0 1 | 18 0 | 1 7   |
| Chr10 | 48665361 | 48665361 | G | T | SNP | 0 0 | 0 1 | 28 2 | 3 11  |
| Chr10 | 48665671 | 48665671 | C | A | SNP | 0 0 | 0 1 | 48 2 | 8 19  |
| Chr10 | 48665705 | 48665705 | A | C | SNP | 0 0 | 0 1 | 42 0 | 5 23  |
| Chr10 | 48665740 | 48665740 | T | C | SNP | 0 0 | 0 1 | 51 0 | 7 22  |
| Chr10 | 48666574 | 48666574 | C | T | SNP | 0 0 | 0 1 | 36 3 | 4 5   |
| Chr10 | 48668636 | 48668636 | T | G | SNP | 0 1 | 0 1 | 65 9 | 4 14  |
| Chr10 | 48668703 | 48668703 | A | G | SNP | 0 1 | 0 1 | 60 8 | 12 18 |
| Chr10 | 48669722 | 48669722 | G | A | SNP | 0 0 | 0 1 | 44 2 | 2 10  |
| Chr10 | 48669723 | 48669723 | T | A | SNP | 0 0 | 0 1 | 44 2 | 2 10  |
| Chr10 | 48670365 | 48670365 | T | G | SNP | 0 0 | 0 1 | 22 1 | 4 11  |
| Chr10 | 48670376 | 48670376 | G | A | SNP | 0 0 | 0 1 | 25 1 | 5 13  |
| Chr10 | 48670430 | 48670430 | A | C | SNP | 0 0 | 0 1 | 28 1 | 3 18  |
| Chr10 | 48670447 | 48670447 | A | G | SNP | 0 0 | 0 1 | 31 1 | 3 17  |
| Chr10 | 48670558 | 48670558 | A | G | SNP | 0 0 | 0 1 | 43 2 | 7 16  |
| Chr10 | 48670629 | 48670629 | C | T | SNP | 0 0 | 0 1 | 35 2 | 12 12 |
| Chr10 | 48670631 | 48670631 | G | T | SNP | 0 0 | 0 1 | 35 2 | 12 12 |
| Chr10 | 48670634 | 48670634 | G | T | SNP | 0 0 | 0 1 | 35 2 | 12 11 |
| Chr10 | 48670848 | 48670848 | G | A | SNP | 0 0 | 0 1 | 37 2 | 5 13  |
| Chr10 | 48670868 | 48670868 | G | A | SNP | 0 0 | 0 1 | 36 2 | 3 10  |
| Chr10 | 48670942 | 48670942 | G | T | SNP | 0 0 | 0 1 | 34 2 | 4 8   |
| Chr10 | 48671006 | 48671006 | T | A | SNP | 0 0 | 1 1 | 34 3 | 1 15  |
| Chr10 | 48671205 | 48671205 | A | C | SNP | 0 1 | 0 1 | 37 5 | 2 6   |
| Chr10 | 48671231 | 48671231 | A | G | SNP | 0 1 | 0 1 | 35 5 | 3 5   |
| Chr10 | 48671790 | 48671790 | A | C | SNP | 0 0 | 0 1 | 21 0 | 4 4   |
| Chr10 | 48672234 | 48672234 | T | C | SNP | 0 0 | 0 1 | 26 0 | 1 7   |
| Chr10 | 48672249 | 48672249 | T | C | SNP | 0 0 | 0 1 | 27 0 | 1 7   |
| Chr10 | 48672295 | 48672295 | T | C | SNP | 0 0 | 0 1 | 26 1 | 3 8   |
| Chr10 | 48672306 | 48672306 | A | C | SNP | 0 1 | 0 1 | 27 2 | 3 9   |
| Chr10 | 48672317 | 48672317 | T | C | SNP | 0 1 | 0 1 | 27 2 | 4 10  |
| Chr10 | 48672322 | 48672322 | C | T | SNP | 0 1 | 0 1 | 27 2 | 4 10  |
| Chr10 | 48672328 | 48672328 | T | C | SNP | 0 0 | 0 1 | 29 2 | 4 10  |
| Chr10 | 48672332 | 48672332 | G | C | SNP | 0 0 | 0 1 | 28 2 | 4 13  |
| Chr10 | 48672339 | 48672339 | C | T | SNP | 0 0 | 0 1 | 32 2 | 4 15  |
| Chr10 | 48672348 | 48672348 | T | C | SNP | 0 0 | 0 1 | 36 2 | 4 16  |
| Chr10 | 48672362 | 48672362 | C | G | SNP | 0 0 | 0 1 | 43 2 | 4 15  |
| Chr10 | 48672385 | 48672385 | T | C | SNP | 0 0 | 0 1 | 48 2 | 4 14  |

|       |          |          |   |   |     |     |     |      |       |
|-------|----------|----------|---|---|-----|-----|-----|------|-------|
| Chr10 | 48672391 | 48672391 | C | T | SNP | 0 0 | 0 1 | 49 2 | 4 14  |
| Chr10 | 48672434 | 48672434 | A | G | SNP | 0 0 | 0 1 | 64 2 | 6 15  |
| Chr10 | 48672557 | 48672557 | A | G | SNP | 0 1 | 0 1 | 68 5 | 4 19  |
| Chr10 | 48672566 | 48672566 | G | A | SNP | 0 1 | 0 1 | 68 5 | 4 20  |
| Chr10 | 48672830 | 48672830 | T | C | SNP | 0 0 | 0 1 | 49 1 | 10 9  |
| Chr10 | 48672879 | 48672879 | G | T | SNP | 0 0 | 0 1 | 38 1 | 10 12 |
| Chr10 | 48673018 | 48673018 | T | G | SNP | 0 0 | 0 1 | 44 2 | 6 3   |
| Chr10 | 48676211 | 48676211 | G | A | SNP | 0 0 | 0 1 | 39 1 | 7 3   |
| Chr10 | 48676219 | 48676219 | G | A | SNP | 0 0 | 0 1 | 43 1 | 7 3   |
| Chr10 | 48676223 | 48676223 | T | C | SNP | 0 0 | 0 1 | 43 0 | 7 3   |
| Chr10 | 48676229 | 48676229 | C | T | SNP | 0 0 | 0 1 | 43 0 | 7 3   |
| Chr10 | 48676237 | 48676237 | G | A | SNP | 0 0 | 0 1 | 44 0 | 5 3   |
| Chr10 | 48676247 | 48676247 | T | C | SNP | 0 0 | 0 1 | 36 0 | 5 3   |
| Chr10 | 48676253 | 48676253 | G | A | SNP | 0 0 | 0 1 | 35 0 | 6 3   |
| Chr10 | 48676257 | 48676257 | G | A | SNP | 0 0 | 0 1 | 36 0 | 5 3   |
| Chr10 | 48676262 | 48676262 | G | A | SNP | 0 0 | 0 1 | 38 0 | 5 3   |
| Chr10 | 48676280 | 48676280 | G | A | SNP | 0 0 | 0 1 | 39 0 | 5 3   |
| Chr10 | 48676284 | 48676284 | C | T | SNP | 0 0 | 0 1 | 39 0 | 5 3   |
| Chr10 | 48676442 | 48676442 | T | C | SNP | 0 0 | 0 1 | 23 0 | 4 7   |
| Chr10 | 48676513 | 48676513 | A | C | SNP | 0 1 | 0 1 | 22 2 | 8 5   |
| Chr10 | 48676549 | 48676549 | C | A | SNP | 0 1 | 0 1 | 21 2 | 7 4   |
| Chr10 | 48680571 | 48680571 | T | G | SNP | 0 0 | 0 1 | 55 3 | 8 12  |
| Chr10 | 48680577 | 48680577 | A | C | SNP | 0 0 | 0 1 | 62 3 | 8 13  |
| Chr10 | 48680679 | 48680679 | T | G | SNP | 0 0 | 0 1 | 52 3 | 2 13  |
| Chr10 | 48680764 | 48680764 | A | G | SNP | 0 0 | 0 1 | 55 2 | 2 17  |
| Chr10 | 48680805 | 48680805 | T | G | SNP | 0 1 | 0 1 | 54 4 | 4 17  |
| Chr10 | 48680937 | 48680937 | A | C | SNP | 0 1 | 0 1 | 55 4 | 5 17  |
| Chr10 | 48680959 | 48680959 | T | C | SNP | 0 1 | 0 1 | 54 4 | 3 16  |
| Chr10 | 48681280 | 48681280 | C | T | SNP | 0 0 | 0 1 | 61 1 | 12 16 |
| Chr10 | 48681319 | 48681319 | G | C | SNP | 0 0 | 0 1 | 63 2 | 11 19 |
| Chr10 | 48681531 | 48681531 | A | T | SNP | 0 0 | 0 1 | 60 4 | 9 13  |
| Chr10 | 48682082 | 48682082 | A | G | SNP | 0 1 | 0 1 | 46 4 | 3 8   |
| Chr10 | 48682162 | 48682162 | C | T | SNP | 0 0 | 0 1 | 60 4 | 4 6   |
| Chr10 | 48682163 | 48682163 | T | C | SNP | 0 0 | 0 1 | 59 4 | 4 6   |
| Chr10 | 48682401 | 48682401 | C | T | SNP | 0 0 | 0 1 | 76 2 | 12 19 |
| Chr10 | 48682461 | 48682461 | A | C | SNP | 0 0 | 0 1 | 77 2 | 11 15 |
| Chr10 | 48682619 | 48682619 | C | A | SNP | 0 1 | 1 1 | 64 7 | 1 21  |
| Chr10 | 48683420 | 48683420 | G | T | SNP | 0 0 | 0 1 | 13 0 | 4 5   |
| Chr10 | 48683577 | 48683577 | A | G | SNP | 0 1 | 0 1 | 37 3 | 2 6   |
| Chr10 | 48684185 | 48684185 | G | C | SNP | 0 0 | 0 1 | 58 2 | 9 6   |
| Chr10 | 48684310 | 48684310 | A | T | SNP | 0 0 | 0 1 | 55 3 | 9 12  |
| Chr10 | 48684351 | 48684351 | C | G | SNP | 0 0 | 0 1 | 48 3 | 9 8   |

|       |          |          |   |   |     |     |     |      |       |
|-------|----------|----------|---|---|-----|-----|-----|------|-------|
| Chr10 | 48684472 | 48684472 | C | G | SNP | 0 0 | 0 1 | 49 1 | 6 8   |
| Chr10 | 48684756 | 48684756 | A | G | SNP | 0 0 | 0 1 | 35 0 | 3 12  |
| Chr10 | 48684997 | 48684997 | G | T | SNP | 0 1 | 0 1 | 40 5 | 1 12  |
| Chr10 | 48685085 | 48685085 | T | C | SNP | 0 1 | 0 1 | 32 6 | 1 11  |
| Chr10 | 48685101 | 48685101 | C | A | SNP | 0 1 | 0 1 | 34 6 | 1 13  |
| Chr10 | 48685183 | 48685183 | A | T | SNP | 0 0 | 1 1 | 37 2 | 0 14  |
| Chr10 | 48685218 | 48685218 | G | A | SNP | 0 0 | 1 1 | 43 0 | 0 10  |
| Chr10 | 48685597 | 48685597 | T | A | SNP | 0 0 | 0 1 | 53 3 | 6 16  |
| Chr10 | 48685703 | 48685703 | T | C | SNP | 0 1 | 0 1 | 37 5 | 4 16  |
| Chr10 | 48686293 | 48686293 | G | A | SNP | 0 0 | 0 1 | 42 3 | 5 12  |
| Chr10 | 48686741 | 48686741 | T | A | SNP | 0 1 | 1 1 | 22 2 | 0 9   |
| Chr10 | 48686750 | 48686750 | A | T | SNP | 0 1 | 0 1 | 20 2 | 1 9   |
| Chr10 | 48687027 | 48687027 | C | T | SNP | 0 0 | 0 1 | 25 0 | 2 14  |
| Chr10 | 48687947 | 48687947 | C | T | SNP | 0 0 | 0 1 | 26 1 | 3 7   |
| Chr10 | 48688223 | 48688223 | A | G | SNP | 0 0 | 0 1 | 39 0 | 4 7   |
| Chr10 | 48688252 | 48688252 | T | C | SNP | 0 0 | 0 1 | 39 0 | 6 8   |
| Chr10 | 48688583 | 48688583 | A | G | SNP | 0 1 | 0 1 | 47 6 | 4 17  |
| Chr10 | 48689540 | 48689540 | C | T | SNP | 0 0 | 0 1 | 65 0 | 10 13 |
| Chr10 | 48690060 | 48690060 | C | G | SNP | 0 0 | 0 1 | 59 4 | 11 9  |
| Chr10 | 48690259 | 48690259 | A | G | SNP | 0 1 | 0 1 | 52 4 | 8 17  |
| Chr10 | 48691897 | 48691897 | T | C | SNP | 0 0 | 0 1 | 30 2 | 3 7   |
| Chr10 | 48692446 | 48692446 | C | T | SNP | 0 1 | 0 1 | 40 9 | 6 14  |
| Chr10 | 48692693 | 48692693 | A | T | SNP | 0 1 | 0 1 | 45 4 | 5 12  |
| Chr10 | 48692695 | 48692695 | G | T | SNP | 0 1 | 0 1 | 45 4 | 5 12  |
| Chr10 | 48692988 | 48692988 | G | T | SNP | 0 0 | 0 1 | 45 3 | 9 15  |
| Chr10 | 48694224 | 48694224 | G | T | SNP | 0 1 | 0 1 | 16 2 | 4 4   |
| Chr10 | 48694502 | 48694502 | T | A | SNP | 0 1 | 0 1 | 10 1 | 5 4   |
| Chr10 | 48694587 | 48694587 | G | A | SNP | 0 1 | 0 1 | 11 2 | 7 7   |
| Chr10 | 48694715 | 48694715 | C | T | SNP | 0 1 | 0 1 | 17 2 | 5 9   |
| Chr10 | 48694802 | 48694802 | G | A | SNP | 0 1 | 0 1 | 19 6 | 5 20  |
| Chr10 | 48694848 | 48694848 | A | G | SNP | 0 1 | 0 1 | 23 5 | 3 16  |
| Chr10 | 48694889 | 48694889 | A | G | SNP | 0 1 | 1 1 | 31 4 | 2 15  |
| Chr10 | 48694905 | 48694905 | T | C | SNP | 0 1 | 0 1 | 32 4 | 2 10  |
| Chr10 | 48694957 | 48694957 | C | T | SNP | 0 0 | 0 1 | 22 0 | 4 6   |
| Chr10 | 48695063 | 48695063 | A | G | SNP | 0 1 | 0 1 | 14 3 | 2 6   |
| Chr10 | 48695541 | 48695541 | T | A | SNP | 0 1 | 0 1 | 10 2 | 2 6   |
| Chr10 | 48695781 | 48695781 | A | G | SNP | 0 0 | 0 1 | 46 3 | 5 19  |
| Chr10 | 48695811 | 48695811 | T | G | SNP | 0 0 | 0 1 | 50 2 | 3 18  |
| Chr10 | 48696487 | 48696487 | G | A | SNP | 0 0 | 0 1 | 22 1 | 3 12  |
| Chr10 | 48697429 | 48697429 | C | T | SNP | 0 1 | 0 1 | 66 5 | 8 8   |
| Chr10 | 48697764 | 48697764 | T | G | SNP | 0 1 | 0 1 | 55 5 | 12 13 |
| Chr10 | 48698344 | 48698344 | G | A | SNP | 0 1 | 0 1 | 37 4 | 5 9   |

|       |          |          |   |   |     |     |     |       |       |
|-------|----------|----------|---|---|-----|-----|-----|-------|-------|
| Chr10 | 48699467 | 48699467 | A | C | SNP | 0 0 | 0 1 | 51 1  | 5 14  |
| Chr10 | 48700169 | 48700169 | A | C | SNP | 0 0 | 0 1 | 33 3  | 11 16 |
| Chr10 | 48700578 | 48700578 | G | A | SNP | 0 1 | 0 1 | 36 8  | 8 8   |
| Chr10 | 48702429 | 48702429 | A | T | SNP | 0 1 | 0 1 | 25 4  | 5 7   |
| Chr10 | 48702430 | 48702430 | A | T | SNP | 0 1 | 0 1 | 26 4  | 5 7   |
| Chr10 | 48702431 | 48702431 | A | T | SNP | 0 1 | 0 1 | 26 4  | 5 7   |
| Chr10 | 48702811 | 48702811 | C | T | SNP | 0 0 | 0 1 | 45 1  | 11 13 |
| Chr10 | 48703926 | 48703926 | A | T | SNP | 0 0 | 0 1 | 22 0  | 2 10  |
| Chr10 | 48705545 | 48705545 | C | A | SNP | 0 1 | 0 1 | 38 4  | 3 8   |
| Chr10 | 48705662 | 48705662 | G | A | SNP | 0 0 | 0 1 | 49 1  | 2 13  |
| Chr10 | 48705932 | 48705932 | G | A | SNP | 0 1 | 0 1 | 44 11 | 8 7   |
| Chr10 | 48706903 | 48706903 | T | C | SNP | 0 1 | 0 1 | 44 4  | 5 12  |
| Chr10 | 48707094 | 48707094 | A | G | SNP | 0 0 | 0 1 | 31 0  | 4 13  |
| Chr10 | 48707192 | 48707192 | G | C | SNP | 0 0 | 0 1 | 34 0  | 3 12  |
| Chr10 | 48707615 | 48707615 | T | C | SNP | 0 0 | 0 1 | 45 1  | 7 5   |
| Chr10 | 48713269 | 48713269 | G | A | SNP | 0 1 | 0 1 | 27 5  | 3 6   |
| Chr10 | 48717351 | 48717351 | C | T | SNP | 0 1 | 0 1 | 30 3  | 6 13  |
| Chr10 | 48719373 | 48719373 | C | T | SNP | 0 1 | 0 1 | 41 8  | 5 11  |
| Chr10 | 48719400 | 48719400 | A | C | SNP | 0 1 | 0 1 | 42 8  | 3 12  |
| Chr10 | 48719511 | 48719511 | C | T | SNP | 0 1 | 0 1 | 25 6  | 3 16  |
| Chr10 | 48719570 | 48719570 | G | C | SNP | 0 0 | 0 1 | 40 3  | 2 19  |
| Chr10 | 48719600 | 48719600 | T | A | SNP | 0 0 | 0 1 | 49 4  | 2 18  |
| Chr10 | 48719678 | 48719678 | C | T | SNP | 0 1 | 0 1 | 49 4  | 2 15  |
| Chr10 | 48719679 | 48719679 | T | A | SNP | 0 1 | 0 1 | 48 4  | 2 15  |
| Chr10 | 48720678 | 48720678 | G | A | SNP | 0 1 | 0 1 | 30 4  | 6 4   |
| Chr10 | 48722910 | 48722910 | A | G | SNP | 0 0 | 0 1 | 24 1  | 2 12  |
| Chr10 | 48722945 | 48722945 | A | G | SNP | 0 1 | 0 1 | 28 3  | 2 12  |
| Chr10 | 48723132 | 48723132 | A | G | SNP | 0 0 | 0 1 | 34 2  | 5 9   |
| Chr10 | 48723250 | 48723250 | C | A | SNP | 0 0 | 0 1 | 21 1  | 4 5   |
| Chr10 | 48723251 | 48723251 | T | A | SNP | 0 0 | 0 1 | 21 1  | 4 5   |
| Chr10 | 48723473 | 48723473 | T | A | SNP | 0 0 | 0 1 | 15 0  | 4 5   |
| Chr10 | 48724870 | 48724870 | G | C | SNP | 0 1 | 0 1 | 21 11 | 1 10  |
| Chr10 | 48727894 | 48727894 | A | T | SNP | 0 0 | 0 1 | 44 5  | 3 13  |
| Chr10 | 48731730 | 48731730 | T | C | SNP | 0 0 | 0 1 | 74 5  | 6 22  |
| Chr10 | 48732383 | 48732383 | G | A | SNP | 0 1 | 0 1 | 70 4  | 9 7   |
| Chr10 | 48732397 | 48732397 | C | T | SNP | 0 0 | 0 1 | 71 5  | 9 8   |
| Chr10 | 48732689 | 48732689 | C | G | SNP | 0 0 | 0 1 | 36 1  | 2 7   |
| Chr10 | 48733167 | 48733167 | A | T | SNP | 0 0 | 0 1 | 13 0  | 2 8   |
| Chr10 | 48734272 | 48734272 | G | T | SNP | 0 1 | 0 1 | 9 4   | 2 7   |
| Chr10 | 48735482 | 48735482 | T | A | SNP | 0 0 | 0 1 | 48 5  | 3 6   |
| Chr10 | 48735532 | 48735532 | G | C | SNP | 0 0 | 0 1 | 39 2  | 3 7   |
| Chr10 | 48736222 | 48736222 | G | A | SNP | 0 0 | 0 1 | 56 2  | 4 14  |

|       |          |          |   |   |     |     |     |       |       |
|-------|----------|----------|---|---|-----|-----|-----|-------|-------|
| Chr10 | 48736355 | 48736355 | A | T | SNP | 0 1 | 0 1 | 61 9  | 3 15  |
| Chr10 | 48736839 | 48736839 | A | C | SNP | 0 1 | 0 1 | 51 7  | 1 19  |
| Chr10 | 48737635 | 48737635 | A | T | SNP | 0 0 | 0 1 | 59 3  | 7 9   |
| Chr10 | 48740699 | 48740699 | C | G | SNP | 0 1 | 1 1 | 14 2  | 0 9   |
| Chr10 | 48740756 | 48740756 | G | T | SNP | 0 1 | 0 1 | 19 2  | 2 13  |
| Chr10 | 48741105 | 48741105 | T | C | SNP | 0 0 | 0 1 | 72 4  | 5 14  |
| Chr10 | 48741133 | 48741133 | T | C | SNP | 0 0 | 0 1 | 60 4  | 6 15  |
| Chr10 | 48741165 | 48741165 | A | G | SNP | 0 1 | 0 1 | 52 9  | 7 15  |
| Chr10 | 48741461 | 48741461 | G | A | SNP | 0 1 | 0 1 | 45 5  | 5 11  |
| Chr10 | 48742045 | 48742045 | A | T | SNP | 0 1 | 0 1 | 52 7  | 5 20  |
| Chr10 | 48742305 | 48742305 | T | C | SNP | 0 1 | 0 1 | 50 6  | 9 10  |
| Chr10 | 48742601 | 48742601 | C | T | SNP | 0 1 | 0 1 | 49 7  | 7 15  |
| Chr10 | 48742642 | 48742642 | T | A | SNP | 0 1 | 0 1 | 53 5  | 6 15  |
| Chr10 | 48743263 | 48743263 | C | G | SNP | 0 0 | 0 1 | 51 4  | 7 12  |
| Chr10 | 48743324 | 48743324 | T | G | SNP | 0 1 | 0 1 | 52 4  | 5 11  |
| Chr10 | 48743372 | 48743372 | G | A | SNP | 0 1 | 0 1 | 46 7  | 4 14  |
| Chr10 | 48743475 | 48743475 | C | T | SNP | 0 1 | 0 1 | 42 6  | 10 11 |
| Chr10 | 48743477 | 48743477 | C | A | SNP | 0 1 | 0 1 | 41 6  | 10 11 |
| Chr10 | 48743762 | 48743762 | T | C | SNP | 0 1 | 0 1 | 38 4  | 4 7   |
| Chr10 | 48743763 | 48743763 | G | A | SNP | 0 1 | 0 1 | 38 4  | 4 7   |
| Chr10 | 48743852 | 48743852 | A | C | SNP | 0 1 | 0 1 | 44 4  | 6 9   |
| Chr10 | 48743889 | 48743889 | C | T | SNP | 0 1 | 0 1 | 42 4  | 8 10  |
| Chr10 | 48744035 | 48744035 | C | G | SNP | 0 1 | 0 1 | 64 5  | 11 23 |
| Chr10 | 48744092 | 48744092 | T | C | SNP | 0 1 | 0 1 | 71 9  | 10 19 |
| Chr10 | 48744276 | 48744276 | G | A | SNP | 0 1 | 0 1 | 63 8  | 6 19  |
| Chr10 | 48744347 | 48744347 | T | C | SNP | 0 0 | 0 1 | 82 7  | 5 25  |
| Chr10 | 48744423 | 48744423 | A | C | SNP | 0 0 | 0 1 | 71 7  | 9 20  |
| Chr10 | 48744821 | 48744821 | C | G | SNP | 0 1 | 0 1 | 63 11 | 8 12  |
| Chr10 | 48744940 | 48744940 | T | C | SNP | 0 1 | 0 1 | 57 7  | 5 18  |
| Chr10 | 48745163 | 48745163 | C | T | SNP | 0 1 | 0 1 | 56 6  | 8 17  |
| Chr10 | 48745226 | 48745226 | C | A | SNP | 0 1 | 1 1 | 37 5  | 1 16  |
| Chr10 | 48745341 | 48745341 | A | C | SNP | 0 0 | 0 1 | 46 2  | 2 8   |
| Chr10 | 48745741 | 48745741 | G | A | SNP | 0 1 | 0 1 | 35 4  | 11 20 |
| Chr10 | 48745820 | 48745820 | G | A | SNP | 0 0 | 0 1 | 43 3  | 11 19 |
| Chr10 | 48745960 | 48745960 | G | A | SNP | 0 0 | 0 1 | 34 2  | 5 12  |
| Chr10 | 48746103 | 48746103 | T | C | SNP | 0 0 | 0 1 | 43 1  | 6 11  |
| Chr10 | 48746110 | 48746110 | C | T | SNP | 0 0 | 0 1 | 44 1  | 6 12  |
| Chr10 | 48746261 | 48746261 | T | C | SNP | 0 0 | 0 1 | 62 0  | 7 17  |
| Chr10 | 48746431 | 48746431 | C | G | SNP | 0 1 | 0 1 | 35 3  | 1 13  |
| Chr10 | 48746778 | 48746778 | G | A | SNP | 0 1 | 0 1 | 36 4  | 6 6   |
| Chr10 | 48747425 | 48747425 | G | A | SNP | 0 0 | 0 1 | 11 0  | 3 7   |
| Chr10 | 48747431 | 48747431 | G | C | SNP | 0 0 | 0 1 | 11 0  | 3 5   |



|       |          |          |   |   |     |     |     |      |      |
|-------|----------|----------|---|---|-----|-----|-----|------|------|
| Chr10 | 48749500 | 48749500 | G | T | SNP | 0 1 | 0 1 | 36 3 | 3 12 |
| Chr10 | 48752722 | 48752722 | T | C | SNP | 0 0 | 0 1 | 48 3 | 8 20 |
| Chr10 | 48752737 | 48752737 | A | G | SNP | 0 0 | 0 1 | 47 3 | 9 20 |
| Chr10 | 48753597 | 48753597 | A | G | SNP | 0 1 | 0 1 | 51 5 | 9 11 |
| Chr10 | 48753641 | 48753641 | A | G | SNP | 0 0 | 0 1 | 45 3 | 9 10 |
| Chr10 | 48754709 | 48754709 | T | C | SNP | 0 1 | 0 1 | 55 6 | 11 8 |
| Chr10 | 48755332 | 48755332 | A | G | SNP | 0 1 | 0 1 | 53 6 | 6 16 |
| Chr10 | 48755373 | 48755373 | C | T | SNP | 0 1 | 0 1 | 42 6 | 6 16 |
| Chr10 | 48755753 | 48755753 | G | C | SNP | 0 0 | 0 1 | 53 2 | 9 19 |
| Chr10 | 48756117 | 48756117 | G | T | SNP | 0 0 | 0 1 | 37 0 | 5 13 |
| Chr10 | 48756143 | 48756143 | C | T | SNP | 0 0 | 0 1 | 33 0 | 6 16 |
| Chr10 | 48757048 | 48757048 | T | A | SNP | 0 0 | 0 1 | 41 3 | 4 10 |
| Chr10 | 48757086 | 48757086 | G | T | SNP | 0 0 | 0 1 | 48 3 | 8 8  |
| Chr10 | 48757207 | 48757207 | A | T | SNP | 0 1 | 0 1 | 39 3 | 4 4  |
| Chr10 | 48757726 | 48757726 | G | A | SNP | 0 0 | 0 1 | 42 2 | 6 3  |
| Chr10 | 48757755 | 48757755 | A | C | SNP | 0 0 | 0 1 | 35 2 | 6 6  |
| Chr10 | 48758197 | 48758197 | G | C | SNP | 0 0 | 0 1 | 54 4 | 4 18 |
| Chr10 | 48758267 | 48758267 | T | A | SNP | 0 0 | 0 1 | 70 4 | 3 22 |
| Chr10 | 48758917 | 48758917 | T | C | SNP | 0 0 | 0 1 | 15 2 | 1 7  |
| Chr10 | 48759250 | 48759250 | C | T | SNP | 0 0 | 0 1 | 19 0 | 6 5  |
| Chr10 | 48759541 | 48759541 | A | C | SNP | 0 1 | 1 1 | 35 5 | 0 17 |
| Chr10 | 48760427 | 48760427 | C | T | SNP | 0 1 | 0 1 | 65 7 | 11 9 |
| Chr10 | 48760871 | 48760871 | A | T | SNP | 0 1 | 0 1 | 19 8 | 8 8  |
| Chr10 | 48762117 | 48762117 | C | G | SNP | 0 1 | 0 1 | 9 2  | 1 8  |
| Chr10 | 48763587 | 48763587 | G | A | SNP | 0 0 | 0 1 | 36 1 | 3 17 |
| Chr10 | 48765186 | 48765186 | A | T | SNP | 0 0 | 0 1 | 44 2 | 3 8  |
| Chr10 | 48765248 | 48765248 | C | A | SNP | 0 0 | 0 1 | 52 3 | 2 7  |
| Chr10 | 48765295 | 48765295 | T | A | SNP | 0 0 | 0 1 | 50 4 | 2 7  |
| Chr10 | 48765351 | 48765351 | A | T | SNP | 0 1 | 0 1 | 46 6 | 6 8  |
| Chr10 | 48765501 | 48765501 | T | C | SNP | 0 0 | 0 1 | 37 2 | 6 13 |
| Chr10 | 48765594 | 48765594 | T | C | SNP | 0 1 | 0 1 | 41 3 | 3 8  |
| Chr10 | 48765710 | 48765710 | T | C | SNP | 0 1 | 0 1 | 26 4 | 2 7  |
| Chr10 | 48765809 | 48765809 | A | G | SNP | 0 1 | 0 1 | 10 2 | 1 7  |
| Chr10 | 48766703 | 48766703 | C | T | SNP | 0 0 | 0 1 | 64 3 | 1 9  |
| Chr10 | 48767026 | 48767026 | A | T | SNP | 0 0 | 0 1 | 59 3 | 3 11 |
| Chr10 | 48767062 | 48767062 | T | C | SNP | 0 0 | 0 1 | 53 3 | 2 10 |
| Chr10 | 48767471 | 48767471 | G | T | SNP | 0 1 | 0 1 | 23 9 | 5 4  |
| Chr10 | 48767538 | 48767538 | A | T | SNP | 0 1 | 0 1 | 28 6 | 5 4  |
| Chr10 | 48767778 | 48767778 | T | C | SNP | 0 1 | 0 1 | 42 5 | 3 8  |
| Chr10 | 48767823 | 48767823 | G | A | SNP | 0 1 | 0 1 | 49 4 | 1 13 |
| Chr10 | 48769223 | 48769223 | A | G | SNP | 0 0 | 0 1 | 43 2 | 1 10 |
| Chr10 | 48769652 | 48769652 | A | G | SNP | 0 1 | 0 1 | 59 5 | 7 18 |

|       |          |          |   |   |     |     |     |       |       |
|-------|----------|----------|---|---|-----|-----|-----|-------|-------|
| Chr10 | 48769762 | 48769762 | A | G | SNP | 0 1 | 0 1 | 45 5  | 7 20  |
| Chr10 | 48770139 | 48770139 | A | T | SNP | 0 1 | 0 1 | 53 6  | 9 7   |
| Chr10 | 48770667 | 48770667 | G | T | SNP | 0 1 | 0 1 | 69 6  | 8 10  |
| Chr10 | 48770957 | 48770957 | A | G | SNP | 0 1 | 0 1 | 12 1  | 3 6   |
| Chr10 | 48772965 | 48772965 | C | G | SNP | 0 1 | 0 1 | 49 10 | 6 16  |
| Chr10 | 48773810 | 48773810 | G | C | SNP | 0 1 | 0 1 | 65 9  | 10 15 |
| Chr10 | 48773848 | 48773848 | A | G | SNP | 0 1 | 0 1 | 64 9  | 11 13 |
| Chr10 | 48773851 | 48773851 | C | T | SNP | 0 1 | 0 1 | 64 9  | 11 12 |
| Chr10 | 48774117 | 48774117 | T | A | SNP | 0 1 | 0 1 | 53 5  | 5 9   |
| Chr10 | 48774424 | 48774424 | C | G | SNP | 0 1 | 0 1 | 54 7  | 6 15  |
| Chr10 | 48774649 | 48774649 | G | A | SNP | 0 0 | 0 1 | 54 3  | 4 19  |
| Chr10 | 48774928 | 48774928 | T | A | SNP | 0 1 | 0 1 | 35 5  | 9 10  |
| Chr10 | 48775249 | 48775249 | G | C | SNP | 0 1 | 0 1 | 7 4   | 4 7   |
| Chr10 | 48775608 | 48775608 | C | T | SNP | 0 0 | 0 1 | 42 2  | 8 7   |
| Chr10 | 48775610 | 48775610 | T | C | SNP | 0 0 | 0 1 | 44 2  | 8 7   |
| Chr10 | 48775836 | 48775836 | T | C | SNP | 0 0 | 0 1 | 43 2  | 4 8   |
| Chr10 | 48775966 | 48775966 | C | T | SNP | 0 1 | 0 1 | 65 6  | 7 20  |
| Chr10 | 48776182 | 48776182 | G | A | SNP | 0 0 | 0 1 | 91 4  | 7 16  |
| Chr10 | 48777960 | 48777960 | A | G | SNP | 0 1 | 0 1 | 46 9  | 1 10  |
| Chr10 | 48778983 | 48778983 | G | T | SNP | 0 0 | 0 1 | 58 2  | 7 13  |
| Chr10 | 48779164 | 48779164 | G | A | SNP | 0 0 | 0 1 | 74 4  | 4 10  |
| Chr10 | 48779404 | 48779404 | A | G | SNP | 0 0 | 0 1 | 42 2  | 1 9   |
| Chr10 | 48780093 | 48780093 | T | A | SNP | 0 1 | 0 1 | 43 8  | 3 7   |
| Chr10 | 48780510 | 48780510 | G | T | SNP | 0 0 | 0 1 | 53 4  | 4 7   |
| Chr10 | 48780965 | 48780965 | C | T | SNP | 0 1 | 0 1 | 23 4  | 2 7   |
| Chr10 | 48781151 | 48781151 | A | G | SNP | 0 0 | 0 1 | 18 1  | 6 6   |
| Chr10 | 48781522 | 48781522 | G | A | SNP | 0 1 | 0 1 | 33 6  | 4 9   |
| Chr10 | 48782153 | 48782153 | A | G | SNP | 0 1 | 0 1 | 28 7  | 5 11  |
| Chr10 | 48782300 | 48782300 | A | T | SNP | 0 0 | 0 1 | 48 2  | 3 12  |
| Chr10 | 48783554 | 48783554 | A | G | SNP | 0 1 | 0 1 | 47 10 | 2 12  |
| Chr10 | 48783919 | 48783919 | A | T | SNP | 0 0 | 0 1 | 34 2  | 6 9   |
| Chr10 | 48785134 | 48785134 | G | T | SNP | 0 1 | 0 1 | 35 4  | 4 7   |
| Chr10 | 48785976 | 48785976 | G | C | SNP | 0 0 | 0 1 | 47 1  | 7 15  |
| Chr10 | 48786364 | 48786364 | T | C | SNP | 0 1 | 0 1 | 41 7  | 6 7   |
| Chr10 | 48786640 | 48786640 | G | A | SNP | 0 0 | 0 1 | 57 3  | 3 9   |
| Chr10 | 48787020 | 48787020 | A | T | SNP | 0 1 | 0 1 | 47 7  | 5 17  |
| Chr10 | 48787115 | 48787115 | A | G | SNP | 0 0 | 0 1 | 35 1  | 5 20  |
| Chr10 | 48787790 | 48787790 | T | A | SNP | 0 0 | 0 1 | 28 1  | 3 11  |
| Chr10 | 48787850 | 48787850 | C | A | SNP | 0 0 | 0 1 | 33 1  | 5 4   |
| Chr10 | 48791039 | 48791039 | A | T | SNP | 0 1 | 0 1 | 46 4  | 6 21  |
| Chr10 | 48791452 | 48791452 | G | T | SNP | 0 1 | 0 1 | 36 4  | 2 14  |
| Chr10 | 48791621 | 48791621 | A | C | SNP | 0 1 | 0 1 | 26 3  | 1 8   |

|       |          |          |   |   |     |     |     |       |       |
|-------|----------|----------|---|---|-----|-----|-----|-------|-------|
| Chr10 | 48791629 | 48791629 | A | G | SNP | 0 1 | 0 1 | 23 3  | 1 8   |
| Chr10 | 48791692 | 48791692 | A | G | SNP | 0 1 | 0 1 | 14 3  | 2 8   |
| Chr10 | 48791715 | 48791715 | G | A | SNP | 0 1 | 0 1 | 16 2  | 2 8   |
| Chr10 | 48791950 | 48791950 | A | C | SNP | 0 1 | 0 1 | 18 2  | 3 7   |
| Chr10 | 48792611 | 48792611 | C | T | SNP | 0 1 | 0 1 | 20 3  | 1 7   |
| Chr10 | 48792612 | 48792612 | A | G | SNP | 0 1 | 0 1 | 20 3  | 1 7   |
| Chr10 | 48792629 | 48792629 | G | A | SNP | 0 1 | 0 1 | 21 3  | 1 7   |
| Chr10 | 48792648 | 48792648 | T | C | SNP | 0 1 | 0 1 | 23 2  | 3 7   |
| Chr10 | 48792826 | 48792826 | C | T | SNP | 0 0 | 0 1 | 25 2  | 2 6   |
| Chr10 | 48792847 | 48792847 | T | A | SNP | 0 0 | 0 1 | 21 0  | 2 8   |
| Chr10 | 48793396 | 48793396 | A | T | SNP | 0 1 | 0 1 | 11 2  | 2 9   |
| Chr10 | 48796665 | 48796665 | A | C | SNP | 0 1 | 0 1 | 20 2  | 5 5   |
| Chr10 | 48796735 | 48796735 | G | A | SNP | 0 1 | 0 1 | 25 1  | 3 7   |
| Chr10 | 48796736 | 48796736 | G | A | SNP | 0 1 | 0 1 | 25 1  | 3 7   |
| Chr10 | 48796749 | 48796749 | G | A | SNP | 0 1 | 0 1 | 24 2  | 4 6   |
| Chr10 | 48796750 | 48796750 | T | C | SNP | 0 1 | 0 1 | 24 2  | 4 6   |
| Chr10 | 48797051 | 48797051 | A | G | SNP | 0 0 | 0 1 | 44 3  | 5 7   |
| Chr10 | 48797074 | 48797074 | C | T | SNP | 0 1 | 0 1 | 51 5  | 5 7   |
| Chr10 | 48797154 | 48797154 | C | T | SNP | 0 0 | 0 1 | 48 3  | 4 5   |
| Chr10 | 48797155 | 48797155 | C | T | SNP | 0 0 | 0 1 | 48 3  | 4 5   |
| Chr10 | 48797200 | 48797200 | C | T | SNP | 0 1 | 0 1 | 46 5  | 2 7   |
| Chr10 | 48798373 | 48798373 | G | A | SNP | 0 1 | 1 1 | 24 6  | 0 9   |
| Chr10 | 48798595 | 48798595 | A | G | SNP | 0 1 | 0 1 | 31 4  | 2 9   |
| Chr10 | 48798608 | 48798608 | G | A | SNP | 0 1 | 0 1 | 31 4  | 2 9   |
| Chr10 | 48798615 | 48798615 | A | G | SNP | 0 1 | 0 1 | 31 3  | 1 9   |
| Chr10 | 48798780 | 48798780 | A | C | SNP | 0 1 | 0 1 | 36 7  | 2 6   |
| Chr10 | 48798945 | 48798945 | C | T | SNP | 0 0 | 0 1 | 41 1  | 4 11  |
| Chr10 | 48799491 | 48799491 | G | T | SNP | 0 0 | 0 1 | 31 2  | 5 14  |
| Chr10 | 48800817 | 48800817 | C | T | SNP | 0 1 | 0 1 | 25 4  | 5 14  |
| Chr10 | 48801452 | 48801452 | G | C | SNP | 0 0 | 0 1 | 40 2  | 3 11  |
| Chr10 | 48801728 | 48801728 | G | A | SNP | 0 1 | 0 1 | 42 7  | 1 10  |
| Chr10 | 48803043 | 48803043 | C | T | SNP | 0 0 | 0 1 | 15 1  | 5 3   |
| Chr10 | 48804531 | 48804531 | T | A | SNP | 0 0 | 0 1 | 15 1  | 2 11  |
| Chr10 | 48804539 | 48804539 | G | A | SNP | 0 0 | 0 1 | 16 1  | 2 14  |
| Chr10 | 48804561 | 48804561 | G | A | SNP | 0 1 | 1 1 | 16 3  | 0 14  |
| Chr10 | 48806258 | 48806258 | G | A | SNP | 0 1 | 0 1 | 33 10 | 3 8   |
| Chr10 | 48807379 | 48807379 | C | T | SNP | 0 0 | 0 1 | 63 5  | 9 18  |
| Chr10 | 48807977 | 48807977 | A | G | SNP | 0 1 | 0 1 | 63 8  | 10 12 |
| Chr10 | 48808277 | 48808277 | A | G | SNP | 0 1 | 0 1 | 41 6  | 5 12  |
| Chr10 | 48808663 | 48808663 | T | C | SNP | 0 0 | 0 1 | 37 1  | 4 7   |
| Chr10 | 48809105 | 48809105 | T | A | SNP | 0 0 | 0 1 | 18 1  | 8 4   |
| Chr10 | 48810763 | 48810763 | G | T | SNP | 0 0 | 0 1 | 28 1  | 2 7   |

|       |          |          |   |   |     |     |     |      |       |
|-------|----------|----------|---|---|-----|-----|-----|------|-------|
| Chr10 | 48810815 | 48810815 | T | C | SNP | 0 0 | 0 1 | 33 0 | 2 6   |
| Chr10 | 48811724 | 48811724 | C | T | SNP | 0 0 | 0 1 | 26 2 | 3 5   |
| Chr10 | 48813449 | 48813449 | T | A | SNP | 0 0 | 0 1 | 20 1 | 2 9   |
| Chr10 | 48813570 | 48813570 | A | T | SNP | 0 1 | 0 1 | 29 7 | 4 7   |
| Chr10 | 48813696 | 48813696 | C | A | SNP | 0 1 | 0 1 | 28 5 | 7 9   |
| Chr10 | 48813721 | 48813721 | G | A | SNP | 0 1 | 0 1 | 32 4 | 11 13 |
| Chr10 | 48813736 | 48813736 | C | A | SNP | 0 1 | 0 1 | 33 4 | 13 10 |
| Chr10 | 48813765 | 48813765 | C | T | SNP | 0 1 | 0 1 | 38 3 | 11 11 |
| Chr10 | 48813792 | 48813792 | A | G | SNP | 0 0 | 0 1 | 44 2 | 11 16 |
| Chr10 | 48813835 | 48813835 | T | C | SNP | 0 0 | 0 1 | 55 2 | 13 17 |
| Chr10 | 48813955 | 48813955 | T | C | SNP | 0 0 | 0 1 | 59 3 | 7 21  |
| Chr10 | 48813961 | 48813961 | C | A | SNP | 0 0 | 0 1 | 58 3 | 7 22  |
| Chr10 | 48814112 | 48814112 | G | A | SNP | 0 1 | 0 1 | 51 7 | 15 17 |
| Chr10 | 48814166 | 48814166 | G | A | SNP | 0 0 | 0 1 | 52 5 | 14 25 |
| Chr10 | 48814205 | 48814205 | G | A | SNP | 0 1 | 0 1 | 59 5 | 14 22 |
| Chr10 | 48814206 | 48814206 | T | C | SNP | 0 1 | 0 1 | 59 5 | 14 23 |
| Chr10 | 48814217 | 48814217 | T | G | SNP | 0 1 | 0 1 | 57 5 | 15 24 |
| Chr10 | 48814226 | 48814226 | C | T | SNP | 0 1 | 0 1 | 54 5 | 15 24 |
| Chr10 | 48814322 | 48814322 | G | T | SNP | 0 0 | 0 1 | 44 0 | 6 12  |
| Chr10 | 48814381 | 48814381 | G | T | SNP | 0 0 | 0 1 | 32 0 | 7 9   |
| Chr10 | 48815818 | 48815818 | T | A | SNP | 0 1 | 0 1 | 24 3 | 2 12  |
| Chr10 | 48816916 | 48816916 | C | A | SNP | 0 0 | 0 1 | 11 0 | 2 8   |
| Chr10 | 48817603 | 48817603 | A | C | SNP | 0 0 | 0 1 | 48 4 | 6 14  |
| Chr10 | 48818217 | 48818217 | A | G | SNP | 0 1 | 0 1 | 48 7 | 8 25  |
| Chr10 | 48818911 | 48818911 | A | G | SNP | 0 1 | 0 1 | 57 5 | 5 22  |
| Chr10 | 48820456 | 48820456 | C | T | SNP | 0 1 | 0 1 | 49 6 | 6 18  |
| Chr10 | 48820981 | 48820981 | A | T | SNP | 0 1 | 0 1 | 41 6 | 3 13  |
| Chr10 | 48821422 | 48821422 | C | A | SNP | 0 1 | 0 1 | 44 7 | 5 30  |
| Chr10 | 48824175 | 48824175 | A | T | SNP | 0 1 | 0 1 | 16 4 | 6 21  |
| Chr10 | 48824288 | 48824288 | C | T | SNP | 0 1 | 0 1 | 26 4 | 7 10  |
| Chr10 | 48824355 | 48824355 | T | C | SNP | 0 1 | 0 1 | 22 4 | 5 10  |
| Chr10 | 48826295 | 48826295 | A | T | SNP | 0 1 | 0 1 | 32 5 | 4 11  |
| Chr10 | 48826415 | 48826415 | G | A | SNP | 0 1 | 0 1 | 41 4 | 5 20  |
| Chr10 | 48827896 | 48827896 | T | C | SNP | 0 1 | 0 1 | 54 6 | 3 13  |
| Chr10 | 48828257 | 48828257 | G | A | SNP | 0 1 | 0 1 | 27 4 | 3 11  |
| Chr10 | 48828322 | 48828322 | A | G | SNP | 0 1 | 0 1 | 28 5 | 5 13  |
| Chr10 | 48830324 | 48830324 | T | G | SNP | 0 1 | 0 1 | 21 3 | 4 5   |
| Chr10 | 48830383 | 48830383 | G | A | SNP | 0 0 | 0 1 | 18 1 | 6 4   |
| Chr10 | 48830749 | 48830749 | G | A | SNP | 0 0 | 0 1 | 42 2 | 9 14  |
| Chr10 | 48830929 | 48830929 | A | C | SNP | 0 0 | 0 1 | 41 2 | 13 10 |
| Chr10 | 48831106 | 48831106 | T | G | SNP | 0 1 | 0 1 | 32 3 | 3 8   |
| Chr10 | 48831612 | 48831612 | T | G | SNP | 0 0 | 0 1 | 62 1 | 4 12  |

|       |          |          |   |   |     |     |     |      |       |
|-------|----------|----------|---|---|-----|-----|-----|------|-------|
| Chr10 | 48831689 | 48831689 | C | T | SNP | 0 0 | 0 1 | 52 2 | 5 10  |
| Chr10 | 48832095 | 48832095 | A | C | SNP | 0 1 | 0 1 | 21 2 | 2 9   |
| Chr10 | 48832141 | 48832141 | C | T | SNP | 0 1 | 0 1 | 21 2 | 4 17  |
| Chr10 | 48832317 | 48832317 | T | A | SNP | 0 1 | 1 1 | 29 4 | 0 15  |
| Chr10 | 48832461 | 48832461 | C | G | SNP | 0 1 | 0 1 | 33 3 | 1 9   |
| Chr10 | 48833365 | 48833365 | A | G | SNP | 0 0 | 0 1 | 19 0 | 5 6   |
| Chr10 | 48835208 | 48835208 | G | A | SNP | 0 0 | 0 1 | 22 1 | 2 7   |
| Chr10 | 48837629 | 48837629 | A | C | SNP | 0 1 | 0 1 | 31 3 | 5 8   |
| Chr10 | 48838167 | 48838167 | A | T | SNP | 0 1 | 0 1 | 33 3 | 3 7   |
| Chr10 | 48838535 | 48838535 | C | A | SNP | 0 1 | 0 1 | 43 4 | 4 19  |
| Chr10 | 48839412 | 48839412 | A | G | SNP | 0 1 | 0 1 | 9 1  | 3 8   |
| Chr10 | 48839434 | 48839434 | A | G | SNP | 0 1 | 0 1 | 7 1  | 4 11  |
| Chr10 | 48839452 | 48839452 | T | C | SNP | 0 1 | 0 1 | 8 1  | 4 12  |
| Chr10 | 48839456 | 48839456 | G | A | SNP | 0 1 | 0 1 | 8 1  | 4 13  |
| Chr10 | 48839465 | 48839465 | T | C | SNP | 0 1 | 0 1 | 8 1  | 2 13  |
| Chr10 | 48839523 | 48839523 | G | A | SNP | 0 0 | 0 1 | 8 0  | 4 6   |
| Chr10 | 48839536 | 48839536 | T | C | SNP | 0 0 | 0 1 | 9 0  | 6 4   |
| Chr10 | 48839609 | 48839609 | A | G | SNP | 0 0 | 0 1 | 9 0  | 4 4   |
| Chr10 | 48839839 | 48839839 | C | T | SNP | 0 1 | 0 1 | 8 1  | 3 5   |
| Chr10 | 48839840 | 48839840 | A | G | SNP | 0 1 | 0 1 | 8 1  | 3 5   |
| Chr10 | 48840431 | 48840431 | G | A | SNP | 0 1 | 0 1 | 21 2 | 3 8   |
| Chr10 | 48840956 | 48840956 | T | C | SNP | 0 0 | 1 1 | 12 0 | 0 8   |
| Chr10 | 48841042 | 48841042 | T | C | SNP | 0 1 | 0 1 | 22 3 | 1 7   |
| Chr10 | 48841050 | 48841050 | C | T | SNP | 0 1 | 0 1 | 23 3 | 1 7   |
| Chr10 | 48841582 | 48841582 | T | C | SNP | 0 1 | 0 1 | 25 2 | 2 6   |
| Chr10 | 48841858 | 48841858 | G | C | SNP | 0 0 | 0 1 | 33 1 | 3 10  |
| Chr10 | 48841993 | 48841993 | A | T | SNP | 0 0 | 0 1 | 32 2 | 3 12  |
| Chr10 | 48842046 | 48842046 | T | A | SNP | 0 1 | 0 1 | 29 6 | 5 13  |
| Chr10 | 48842077 | 48842077 | G | C | SNP | 0 1 | 0 1 | 34 6 | 5 11  |
| Chr10 | 48842694 | 48842694 | G | A | SNP | 0 1 | 0 1 | 24 3 | 6 8   |
| Chr10 | 48842718 | 48842718 | G | A | SNP | 0 1 | 0 1 | 32 3 | 6 8   |
| Chr10 | 48842771 | 48842771 | T | C | SNP | 0 0 | 0 1 | 44 3 | 6 7   |
| Chr10 | 48842816 | 48842816 | A | G | SNP | 0 1 | 0 1 | 39 3 | 3 5   |
| Chr10 | 48842909 | 48842909 | A | G | SNP | 0 1 | 0 1 | 34 6 | 3 8   |
| Chr10 | 48842935 | 48842935 | A | G | SNP | 0 1 | 0 1 | 35 6 | 3 5   |
| Chr10 | 48842951 | 48842951 | C | G | SNP | 0 1 | 0 1 | 41 6 | 4 4   |
| Chr10 | 48842975 | 48842975 | A | G | SNP | 0 1 | 0 1 | 43 5 | 4 5   |
| Chr10 | 48844921 | 48844921 | C | G | SNP | 0 1 | 1 1 | 20 2 | 0 8   |
| Chr10 | 48846020 | 48846020 | C | T | SNP | 0 1 | 0 1 | 54 4 | 10 11 |
| Chr10 | 48847388 | 48847388 | C | G | SNP | 0 0 | 0 1 | 32 2 | 11 11 |
| Chr10 | 48847881 | 48847881 | C | T | SNP | 0 0 | 0 1 | 34 1 | 4 7   |
| Chr10 | 48848361 | 48848361 | A | T | SNP | 0 1 | 0 1 | 29 3 | 2 10  |

|       |          |          |   |   |     |     |     |       |       |
|-------|----------|----------|---|---|-----|-----|-----|-------|-------|
| Chr10 | 48848514 | 48848514 | C | A | SNP | 0 0 | 0 1 | 30 2  | 11 10 |
| Chr10 | 48848832 | 48848832 | T | A | SNP | 0 0 | 0 1 | 14 0  | 3 12  |
| Chr10 | 48848919 | 48848919 | C | G | SNP | 0 0 | 0 1 | 16 0  | 2 15  |
| Chr10 | 48848927 | 48848927 | C | A | SNP | 0 0 | 0 1 | 15 0  | 4 14  |
| Chr10 | 48848999 | 48848999 | C | T | SNP | 0 0 | 0 1 | 16 1  | 3 6   |
| Chr10 | 48850139 | 48850139 | T | G | SNP | 0 0 | 0 1 | 24 0  | 3 5   |
| Chr10 | 48850199 | 48850199 | G | A | SNP | 0 0 | 0 1 | 24 0  | 3 5   |
| Chr10 | 48852907 | 48852907 | T | G | SNP | 0 0 | 0 1 | 42 2  | 7 13  |
| Chr10 | 48853600 | 48853600 | A | G | SNP | 0 1 | 0 1 | 40 8  | 4 9   |
| Chr10 | 48854062 | 48854062 | A | C | SNP | 0 1 | 0 1 | 28 6  | 3 8   |
| Chr10 | 48854596 | 48854596 | G | A | SNP | 0 1 | 0 1 | 33 3  | 3 5   |
| Chr10 | 48854597 | 48854597 | T | C | SNP | 0 1 | 0 1 | 33 3  | 3 5   |
| Chr10 | 48855564 | 48855564 | A | T | SNP | 0 1 | 0 1 | 49 5  | 8 17  |
| Chr10 | 48855599 | 48855599 | T | G | SNP | 0 1 | 0 1 | 48 4  | 6 13  |
| Chr10 | 48855906 | 48855906 | C | A | SNP | 0 1 | 0 1 | 38 5  | 4 7   |
| Chr10 | 48856445 | 48856445 | T | C | SNP | 0 1 | 0 1 | 34 7  | 2 10  |
| Chr10 | 48857431 | 48857431 | C | T | SNP | 0 1 | 0 1 | 28 6  | 2 8   |
| Chr10 | 48857549 | 48857549 | C | A | SNP | 0 0 | 0 1 | 33 2  | 3 5   |
| Chr10 | 48858087 | 48858087 | T | G | SNP | 0 1 | 0 1 | 30 4  | 3 12  |
| Chr10 | 48858331 | 48858331 | G | A | SNP | 0 0 | 0 1 | 24 1  | 4 5   |
| Chr10 | 48858983 | 48858983 | A | G | SNP | 0 1 | 0 1 | 45 9  | 3 9   |
| Chr10 | 48860124 | 48860124 | A | G | SNP | 0 1 | 0 1 | 40 4  | 5 15  |
| Chr10 | 48860256 | 48860256 | A | C | SNP | 0 0 | 0 1 | 36 1  | 3 11  |
| Chr10 | 48860404 | 48860404 | G | A | SNP | 0 0 | 0 1 | 40 2  | 4 10  |
| Chr10 | 48860429 | 48860429 | C | G | SNP | 0 0 | 0 1 | 41 0  | 5 10  |
| Chr10 | 48860704 | 48860704 | A | G | SNP | 0 1 | 0 1 | 40 5  | 2 16  |
| Chr10 | 48862087 | 48862087 | T | C | SNP | 0 1 | 0 1 | 40 5  | 3 9   |
| Chr10 | 48862318 | 48862318 | A | C | SNP | 0 1 | 0 1 | 24 3  | 2 10  |
| Chr10 | 48862486 | 48862486 | A | T | SNP | 0 1 | 0 1 | 11 1  | 4 7   |
| Chr10 | 48864064 | 48864064 | G | A | SNP | 0 0 | 0 1 | 15 0  | 2 7   |
| Chr10 | 48864187 | 48864187 | G | A | SNP | 0 0 | 0 1 | 16 0  | 2 11  |
| Chr10 | 48864193 | 48864193 | A | C | SNP | 0 0 | 0 1 | 15 0  | 2 10  |
| Chr10 | 48865093 | 48865093 | G | T | SNP | 0 1 | 0 1 | 36 4  | 5 9   |
| Chr10 | 48866898 | 48866898 | A | T | SNP | 0 0 | 0 1 | 37 1  | 3 10  |
| Chr10 | 48867730 | 48867730 | G | A | SNP | 0 1 | 0 1 | 34 5  | 4 7   |
| Chr10 | 48867849 | 48867849 | A | T | SNP | 0 1 | 0 1 | 44 13 | 16 7  |
| Chr10 | 48867853 | 48867853 | C | T | SNP | 0 1 | 0 1 | 48 13 | 16 8  |
| Chr10 | 48867856 | 48867856 | C | T | SNP | 0 1 | 0 1 | 47 13 | 16 8  |
| Chr10 | 48867879 | 48867879 | T | C | SNP | 0 1 | 0 1 | 51 13 | 16 7  |
| Chr10 | 48867917 | 48867917 | T | G | SNP | 0 1 | 0 1 | 51 13 | 14 11 |
| Chr10 | 48867926 | 48867926 | G | A | SNP | 0 1 | 0 1 | 51 12 | 16 11 |
| Chr10 | 48867965 | 48867965 | G | C | SNP | 0 1 | 0 1 | 53 15 | 22 12 |

|       |          |          |   |   |     |     |     |       |       |
|-------|----------|----------|---|---|-----|-----|-----|-------|-------|
| Chr10 | 48867973 | 48867973 | G | A | SNP | 0 1 | 0 1 | 49 13 | 2 19  |
| Chr10 | 48867989 | 48867989 | A | T | SNP | 0 1 | 0 1 | 43 11 | 17 8  |
| Chr10 | 48868737 | 48868737 | C | T | SNP | 0 0 | 0 1 | 22 0  | 5 5   |
| Chr10 | 48869140 | 48869140 | C | A | SNP | 0 1 | 0 1 | 43 4  | 3 24  |
| Chr10 | 48870279 | 48870279 | A | C | SNP | 0 1 | 0 1 | 52 10 | 26 12 |
| Chr10 | 48870283 | 48870283 | A | T | SNP | 0 1 | 0 1 | 52 11 | 25 12 |
| Chr10 | 48870289 | 48870289 | G | A | SNP | 0 1 | 0 1 | 51 13 | 23 17 |
| Chr10 | 48870309 | 48870309 | C | T | SNP | 0 1 | 0 1 | 52 20 | 18 17 |
| Chr10 | 48870363 | 48870363 | T | C | SNP | 0 1 | 0 1 | 54 18 | 21 13 |
| Chr10 | 48870364 | 48870364 | G | A | SNP | 0 1 | 0 1 | 53 18 | 21 13 |
| Chr10 | 48870369 | 48870369 | C | T | SNP | 0 1 | 0 1 | 54 18 | 20 13 |
| Chr10 | 48871689 | 48871689 | A | T | SNP | 0 1 | 0 1 | 74 10 | 3 7   |
| Chr10 | 48873043 | 48873043 | A | T | SNP | 0 1 | 0 1 | 36 9  | 5 4   |
| Chr10 | 48877522 | 48877522 | G | T | SNP | 0 0 | 0 1 | 55 3  | 7 9   |
| Chr10 | 48878389 | 48878389 | G | A | SNP | 0 1 | 0 1 | 38 5  | 7 9   |
| Chr10 | 48878432 | 48878432 | T | A | SNP | 0 1 | 0 1 | 38 5  | 6 6   |
| Chr10 | 48878856 | 48878856 | A | C | SNP | 0 1 | 0 1 | 38 3  | 2 13  |
| Chr10 | 48879090 | 48879090 | A | G | SNP | 0 0 | 0 1 | 45 2  | 4 15  |
| Chr10 | 48879242 | 48879242 | A | T | SNP | 0 1 | 0 1 | 39 4  | 6 8   |
| Chr10 | 48879423 | 48879423 | T | C | SNP | 0 1 | 0 1 | 17 2  | 2 9   |
| Chr10 | 48879722 | 48879722 | A | C | SNP | 0 1 | 0 1 | 26 2  | 6 6   |
| Chr10 | 48880053 | 48880053 | A | C | SNP | 0 1 | 0 1 | 54 5  | 14 20 |
| Chr10 | 48880054 | 48880054 | G | A | SNP | 0 1 | 0 1 | 55 5  | 14 20 |
| Chr10 | 48880642 | 48880642 | A | T | SNP | 0 0 | 0 1 | 22 1  | 5 16  |
| Chr10 | 48880914 | 48880914 | A | G | SNP | 0 1 | 0 1 | 13 4  | 2 6   |
| Chr10 | 48881297 | 48881297 | A | T | SNP | 0 1 | 0 1 | 19 2  | 3 5   |
| Chr10 | 48881726 | 48881726 | C | T | SNP | 0 0 | 0 1 | 77 6  | 5 22  |
| Chr10 | 48882656 | 48882656 | A | T | SNP | 0 1 | 0 1 | 33 3  | 3 6   |
| Chr10 | 48884053 | 48884053 | C | G | SNP | 0 0 | 0 1 | 73 4  | 9 10  |
| Chr10 | 48884601 | 48884601 | A | G | SNP | 0 1 | 0 1 | 36 4  | 8 16  |
| Chr10 | 48884850 | 48884850 | C | G | SNP | 0 1 | 0 1 | 27 8  | 6 9   |
| Chr10 | 48884937 | 48884937 | C | T | SNP | 0 1 | 0 1 | 21 4  | 3 5   |
| Chr10 | 48885296 | 48885296 | A | G | SNP | 0 1 | 0 1 | 48 5  | 10 16 |
| Chr10 | 48886114 | 48886114 | C | A | SNP | 0 0 | 0 1 | 47 3  | 4 16  |
| Chr10 | 48886423 | 48886423 | C | T | SNP | 0 0 | 0 1 | 59 3  | 8 15  |
| Chr10 | 48886565 | 48886565 | G | A | SNP | 0 0 | 0 1 | 31 2  | 4 9   |
| Chr10 | 48886569 | 48886569 | T | C | SNP | 0 0 | 0 1 | 30 2  | 3 9   |
| Chr10 | 48886618 | 48886618 | T | C | SNP | 0 0 | 0 1 | 26 1  | 2 8   |
| Chr10 | 48887673 | 48887673 | A | G | SNP | 0 1 | 0 1 | 9 4   | 2 8   |
| Chr10 | 48887697 | 48887697 | T | C | SNP | 0 1 | 0 1 | 10 4  | 2 9   |
| Chr10 | 48887710 | 48887710 | A | G | SNP | 0 1 | 0 1 | 9 4   | 3 11  |
| Chr10 | 48887720 | 48887720 | T | G | SNP | 0 1 | 0 1 | 10 4  | 3 11  |

|       |          |          |   |   |     |     |     |       |       |
|-------|----------|----------|---|---|-----|-----|-----|-------|-------|
| Chr10 | 48887749 | 48887749 | A | G | SNP | 0 1 | 0 1 | 12 7  | 3 17  |
| Chr10 | 48887774 | 48887774 | A | G | SNP | 0 1 | 0 1 | 14 5  | 2 17  |
| Chr10 | 48887795 | 48887795 | G | T | SNP | 0 1 | 1 1 | 15 5  | 1 17  |
| Chr10 | 48887862 | 48887862 | A | T | SNP | 0 1 | 1 1 | 13 3  | 0 14  |
| Chr10 | 48887863 | 48887863 | C | T | SNP | 0 1 | 1 1 | 13 3  | 0 14  |
| Chr10 | 48887864 | 48887864 | A | T | SNP | 0 1 | 1 1 | 13 3  | 0 14  |
| Chr10 | 48887942 | 48887942 | A | C | SNP | 0 1 | 0 1 | 14 2  | 2 10  |
| Chr10 | 48888267 | 48888267 | G | A | SNP | 0 1 | 0 1 | 37 10 | 4 7   |
| Chr10 | 48888390 | 48888390 | C | G | SNP | 0 1 | 0 1 | 46 7  | 7 7   |
| Chr10 | 48888486 | 48888486 | A | G | SNP | 0 1 | 0 1 | 39 5  | 6 12  |
| Chr10 | 48888501 | 48888501 | A | C | SNP | 0 1 | 0 1 | 46 6  | 6 17  |
| Chr10 | 48891654 | 48891654 | G | A | SNP | 0 0 | 0 1 | 79 2  | 12 16 |
| Chr10 | 48891868 | 48891868 | T | C | SNP | 0 0 | 0 1 | 48 0  | 2 9   |
| Chr10 | 48891964 | 48891964 | T | A | SNP | 0 0 | 0 1 | 35 0  | 4 7   |
| Chr10 | 48892661 | 48892661 | C | G | SNP | 0 1 | 0 1 | 50 9  | 12 10 |
| Chr10 | 48892682 | 48892682 | T | C | SNP | 0 1 | 0 1 | 44 12 | 10 12 |
| Chr10 | 48892700 | 48892700 | T | C | SNP | 0 1 | 0 1 | 40 12 | 8 13  |
| Chr10 | 48893062 | 48893062 | A | G | SNP | 0 0 | 0 1 | 50 2  | 11 12 |
| Chr10 | 48894996 | 48894996 | C | A | SNP | 0 1 | 0 1 | 35 8  | 8 7   |
| Chr10 | 48895612 | 48895612 | C | T | SNP | 0 1 | 0 1 | 43 5  | 9 11  |
| Chr10 | 48895697 | 48895697 | T | A | SNP | 0 0 | 0 1 | 40 1  | 5 4   |

---
